# Supplementary material for: Assembly and comparison of two closely related Brassica napus genomes
Source: PubMed Central journal article supplement (PMC5698052; doi:10.1111/pbi.12742), 2017-06-14
Supplement: PBI-15-1602-s004.pdf [file PBI-15-1602-s004.pdf]

Supplementary Table 1: Overlap between collections of previously unplaced contigs and contigs placed in the improved Darmor assembly

| Collection of unplaced contigs | Contigs placed on same chromosome by contigPlacer | Previously unplaced contigs | Percentage overlap |
|--------------------------------|---------------------------------------------------|-----------------------------|--------------------|
| chrA01                         | 101                                               | 101                         | 1                  |
| chrA02                         | 57                                                | 58                          | 0.983              |
| chrA03                         | 116                                               | 117                         | 0.992              |
| chrA04                         | 75                                                | 77                          | 0.974              |
| chrA05                         | 92                                                | 99                          | 0.929              |
| chrA06                         | 110                                               | 111                         | 0.991              |
| chrA07                         | 88                                                | 90                          | 0.978              |
| chrA08                         | 49                                                | 51                          | 0.961              |
| chrA09                         | 126                                               | 128                         | 0.984              |
| chrA10                         | 74                                                | 75                          | 0.987              |
| chrC01                         | 155                                               | 159                         | 0.975              |
| chrC02                         | 149                                               | 153                         | 0.974              |
| chrC03                         | 146                                               | 151                         | 0.967              |
| chrC04                         | 149                                               | 150                         | 0.993              |
| chrC05                         | 95                                                | 97                          | 0.979              |
| chrC06                         | 105                                               | 105                         | 1                  |
| chrC07                         | 71                                                | 72                          | 0.986              |
| chrC08                         | 127                                               | 129                         | 0.984              |
| chrC09                         | 139                                               | 140                         | 0.993              |

Supplementary Table 2: Repeats in Darmor and Tapidor

|                            | Darmor             |             |            | Tapidor            |             |            |
|----------------------------|--------------------|-------------|------------|--------------------|-------------|------------|
|                            | Number of elements | Length (bp) | Percentage | Number of elements | Length (bp) | Percentage |
| SINEs:                     | 13,830             | 2,268,190   | 0.27%      | 13,747             | 2,250,366   | 0.35%      |
| LINEs:                     | 36,548             | 27,166,176  | 3.19%      | 39,123             | 24,143,511  | 3.79%      |
| LINE1                      | 35,766             | 26,761,196  | 3.15%      | 36,227             | 23,159,907  | 3.64%      |
| LTR elements:              | 124,318            | 115,347,362 | 13.57%     | 115,389            | 69,213,440  | 10.88%     |
| ERV_classII                | 265                | 155,291     | 0.02%      | 92                 | 46,791      | 0.01%      |
| DNA elements:              | 165,572            | 65,516,456  | 7.71%      | 148,658            | 41,426,419  | 6.51%      |
| hAT-Charlie                | 957                | 199,738     | 0.02%      | 2,535              | 815,769     | 0.13%      |
| Unclassified:              | 267,271            | 88,073,813  | 10.36%     | 283,158            | 77,334,410  | 12.15%     |
| Total interspersed repeats |                    | 298,371,997 | 35.09%     |                    | 214,368,146 | 33.69%     |
| Small RNA:                 | 10,873             | 2,670,218   | 0.31%      | 11,619             | 2,010,379   | 0.32%      |
| Satellites:                | 1,911              | 818,211     | 0.1%       | 3,289              | 758,232     | 0.12%      |
| Simple repeats:            | 171,999            | 8,512,400   | 1%         | 150,456            | 6,905,421   | 1.09%      |
| Low complexity:            | 38,370             | 1,946,233   | 0.23%      | 33,853             | 1,693,601   | 0.27%      |

Supplementary Table 3: Gene expression values for 73 genes present in Darmor and predicted to be absent in Tapidor using RNA-Seq data from Darmor,

| Gene             | Library                       | Unique Counts | FPKM      | FPKM Confidence low |
|------------------|-------------------------------|---------------|-----------|---------------------|
| BnaA10g04830.1D2 | Darmor_AUP_AOSW_2_D09BTACXX.I | 9             | 0.271828  | 0.271828            |
|                  | Darmor_AUP_BOSW_3_D09BTACXX.I | 15            | 0.6124845 | 0.6124845           |
|                  | Darmor_AUP_DOSW_2_D09BTACXX.I | 0             | 0         | 0                   |
|                  | Darmor_AUP_FOSW_4_D09BTACXX.I | 0             | 0         | 0                   |
|                  | Darmor_AUP_HOSW_5_D09BTACXX.I | 7             | 0.2871137 | 0.2871137           |
|                  | Darmor_AUP_IAOSW_1_1_C0UW4A   | 29            | 0.3935434 | 0.3935434           |
|                  | Darmor_AUP_KAOSW_2_1_C0UW4A   | 61            | 0.8264428 | 0.8264428           |
|                  | Darmor_AUP_LAOSW_3_1_C0UW4A   | 0             | 0         | 0                   |
|                  | Darmor_AUP_MAOSW_4_1_C0UW4A   | 0             | 0         | 0                   |
|                  | Darmor_AUP_NAOSW_5_1_C0UW4A   | 0             | 0         | 0                   |
|                  | Darmor_AUP_PAOSW_6_1_C0UW4A   | 185           | 2.561089  | 2.561089            |
|                  | Ningyou_ERR037335             | 0             | 7.38E-37  | 0                   |
|                  | TN04_ERR037297                | 0             | 0         | 0                   |
|                  | TN05_ERR037298                | 0             | 0         | 0                   |
|                  | TN08_ERR037301                | 0             | 0         | 0                   |
|                  | TN103_ERR037317               | 0             | 0         | 0                   |
|                  | TN108_ERR037318               | 0             | 0         | 0                   |
|                  | TN109_ERR037319               | 0             | 0         | 0                   |
|                  | TN10_ERR037294                | 0             | 0         | 0                   |
|                  | TN121_ERR037320               | 0             | 0         | 0                   |
|                  | TN124_ERR037321               | 0             | 0         | 0                   |
|                  | TN126_ERR037322               | 0             | 0         | 0                   |
|                  | TN128_ERR037323               | 0             | 0         | 0                   |
|                  | TN129_ERR037324               | 0             | 0         | 0                   |
|                  | TN12_ERR037302                | 0             | 0         | 0                   |
|                  | TN138_ERR037325               | 0             | 0         | 0                   |
|                  | TN149_ERR037326               | 0             | 0         | 0                   |
|                  | TN161_ERR037327               | 0             | 0         | 0                   |
|                  | TN163_ERR037328               | 0             | 0         | 0                   |
|                  | TN170_ERR037329               | 0             | 0         | 0                   |
|                  | TN171_ERR037332               | 0             | 0         | 0                   |

|                  |                               |     |            |            |
|------------------|-------------------------------|-----|------------|------------|
|                  | TN172_ERR037333               | 0   | 0          | 0          |
|                  | TN176_ERR037330               | 0   | 0          | 0          |
|                  | TN177_ERR037331               | 0   | 0          | 0          |
|                  | TN24_ERR037299                | 0   | 0          | 0          |
|                  | TN28_ERR037295                | 0   | 0          | 0          |
|                  | TN30_ERR037305                | 0   | 0          | 0          |
|                  | TN31_ERR037303                | 0   | 0          | 0          |
|                  | TN38_ERR037304                | 0   | 0          | 0          |
|                  | TN44_ERR037306                | 0   | 0          | 0          |
|                  | TN48_ERR037307                | 0   | 0          | 0          |
|                  | TN51_ERR037308                | 0   | 0          | 0          |
|                  | TN57_ERR037309                | 0   | 0          | 0          |
|                  | TN72_ERR037312                | 0   | 0          | 0          |
|                  | TN76_ERR037311                | 0   | 0          | 0          |
|                  | TN77_ERR037310                | 0   | 0          | 0          |
|                  | TN85_ERR037315                | 0   | 0          | 0          |
|                  | TN88_ERR037313                | 0   | 0          | 0          |
|                  | TN90_ERR037316                | 0   | 0          | 0          |
|                  | Tapidor_ERR037334             | 0   | 0          | 0          |
| BnaC02g10670.1D2 | Darmor_AUP_AOSW_2_D09BTACXX.I | 168 | 4.067222   | 3.500619   |
|                  | Darmor_AUP_BOSW_3_D09BTACXX.I | 279 | 8.732537   | 8.056763   |
|                  | Darmor_AUP_DOSW_2_D09BTACXX.I | 205 | 5.00943    | 4.494313   |
|                  | Darmor_AUP_FOSW_4_D09BTACXX.I | 140 | 4.380874   | 3.900246   |
|                  | Darmor_AUP_HOSW_5_D09BTACXX.I | 106 | 3.844972   | 3.777374   |
|                  | Darmor_AUP_IAOSW_1_1_C0UW4A   | 454 | 4.973223   | 4.487683   |
|                  | Darmor_AUP_KAOSW_2_1_C0UW4A   | 438 | 4.971961   | 4.70785    |
|                  | Darmor_AUP_LAOSW_3_1_C0UW4A   | 488 | 5.370184   | 5.05407    |
|                  | Darmor_AUP_MAOSW_4_1_C0UW4A   | 496 | 5.652043   | 5.336384   |
|                  | Darmor_AUP_NAOSW_5_1_C0UW4A   | 558 | 6.392542   | 5.997986   |
|                  | Darmor_AUP_PAOSW_6_1_C0UW4A   | 506 | 5.429244   | 5.354958   |
|                  | Ningyou_ERR037335             | 1   | 0.04036543 | 0.04029376 |
|                  | TN04_ERR037297                | 0   | 2.98E-27   | 0          |
|                  | TN05_ERR037298                | 2   | 0.2041114  | 0.2040762  |

|  |                 |   |            |            |
|--|-----------------|---|------------|------------|
|  | TN08_ERR037301  | 0 | 6.34E-29   | 0          |
|  | TN103_ERR037317 | 2 | 0.09506797 | 0.09506794 |
|  | TN108_ERR037318 | 0 | 4.30E-28   | 0          |
|  | TN109_ERR037319 | 1 | 0.03735975 | 0.03596505 |
|  | TN10_ERR037294  | 0 | 2.14E-17   | 0          |
|  | TN121_ERR037320 | 0 | 4.43E-23   | 0          |
|  | TN124_ERR037321 | 1 | 0.03077969 | 0.02861889 |
|  | TN126_ERR037322 | 1 | 0.07195103 | 0.05611165 |
|  | TN128_ERR037323 | 0 | 1.06E-28   | 0          |
|  | TN129_ERR037324 | 0 | 1.53E-18   | 0          |
|  | TN12_ERR037302  | 1 | 0.03682674 | 0.03533539 |
|  | TN138_ERR037325 | 0 | 1.61E-28   | 0          |
|  | TN149_ERR037326 | 1 | 0.09795869 | 0          |
|  | TN161_ERR037327 | 1 | 0.05085907 | 0          |
|  | TN163_ERR037328 | 2 | 0.07432646 | 0.02804435 |
|  | TN170_ERR037329 | 2 | 0.06230237 | 0.06005022 |
|  | TN171_ERR037332 | 0 | 2.20E-18   | 0          |
|  | TN172_ERR037333 | 2 | 0.06236717 | 0.06199623 |
|  | TN176_ERR037330 | 0 | 3.79E-33   | 0          |
|  | TN177_ERR037331 | 0 | 2.58E-29   | 0          |
|  | TN24_ERR037299  | 1 | 0.04373916 | 0.03403113 |
|  | TN28_ERR037295  | 0 | 4.86E-26   | 0          |
|  | TN30_ERR037305  | 0 | 1.20E-13   | 0          |
|  | TN31_ERR037303  | 0 | 1.27E-25   | 0          |
|  | TN38_ERR037304  | 1 | 0.03639125 | 0.01520706 |
|  | TN44_ERR037306  | 0 | 5.20E-25   | 0          |
|  | TN48_ERR037307  | 1 | 0.03856766 | 0.03856685 |
|  | TN51_ERR037308  | 1 | 0.04422641 | 0.0332304  |
|  | TN57_ERR037309  | 1 | 0.03225864 | 0.018385   |
|  | TN72_ERR037312  | 0 | 2.04E-16   | 0          |
|  | TN76_ERR037311  | 1 | 0.03454714 | 0.03115492 |
|  | TN77_ERR037310  | 0 | 1.24E-28   | 0          |
|  | TN85_ERR037315  | 0 | 2.32E-26   | 0          |

|                  |                               |   |            |            |
|------------------|-------------------------------|---|------------|------------|
|                  | TN88_ERR037313                | 0 | 1.07E-28   | 0          |
|                  | TN90_ERR037316                | 2 | 0.06843885 | 0.05689483 |
|                  | Tapidor_ERR037334             | 0 | 5.68E-26   | 0          |
| BnaC02g07340.1D2 | Darmor_AUP_AOSW_2_D09BTACXX.I | 0 | 0          | 0          |
|                  | Darmor_AUP_BOSW_3_D09BTACXX.I | 0 | 0          | 0          |
|                  | Darmor_AUP_DOSW_2_D09BTACXX.I | 0 | 0          | 0          |
|                  | Darmor_AUP_FOSW_4_D09BTACXX.I | 0 | 0          | 0          |
|                  | Darmor_AUP_HOSW_5_D09BTACXX.I | 0 | 0          | 0          |
|                  | Darmor_AUP_IAOSW_1_1_C0UW4A   | 0 | 0          | 0          |
|                  | Darmor_AUP_KAOSW_2_1_C0UW4A   | 0 | 6.43E-44   | 0          |
|                  | Darmor_AUP_LAOSW_3_1_C0UW4A   | 0 | 0          | 0          |
|                  | Darmor_AUP_MAOSW_4_1_C0UW4A   | 0 | 0          | 0          |
|                  | Darmor_AUP_NAOSW_5_1_C0UW4A   | 0 | 0          | 0          |
|                  | Darmor_AUP_PAOSW_6_1_C0UW4A   | 0 | 0          | 0          |
|                  | Ningyou_ERR037335             | 0 | 8.50E-29   | 0          |
|                  | TN04_ERR037297                | 0 | 0          | 0          |
|                  | TN05_ERR037298                | 0 | 0          | 0          |
|                  | TN08_ERR037301                | 0 | 0          | 0          |
|                  | TN103_ERR037317               | 0 | 0          | 0          |
|                  | TN108_ERR037318               | 0 | 0          | 0          |
|                  | TN109_ERR037319               | 0 | 0          | 0          |
|                  | TN10_ERR037294                | 0 | 0          | 0          |
|                  | TN121_ERR037320               | 0 | 0          | 0          |
|                  | TN124_ERR037321               | 0 | 0          | 0          |
|                  | TN126_ERR037322               | 0 | 0          | 0          |
|                  | TN128_ERR037323               | 0 | 0          | 0          |
|                  | TN129_ERR037324               | 0 | 8.34E-33   | 0          |
|                  | TN12_ERR037302                | 0 | 0          | 0          |
|                  | TN138_ERR037325               | 0 | 0          | 0          |
|                  | TN149_ERR037326               | 0 | 0          | 0          |
|                  | TN161_ERR037327               | 0 | 0          | 0          |
|                  | TN163_ERR037328               | 0 | 0          | 0          |
|                  | TN170_ERR037329               | 0 | 0          | 0          |

|                  |                               |   |            |   |
|------------------|-------------------------------|---|------------|---|
|                  | TN171_ERR037332               | 0 | 0          | 0 |
|                  | TN172_ERR037333               | 0 | 0          | 0 |
|                  | TN176_ERR037330               | 0 | 0          | 0 |
|                  | TN177_ERR037331               | 0 | 0          | 0 |
|                  | TN24_ERR037299                | 0 | 0          | 0 |
|                  | TN28_ERR037295                | 0 | 0          | 0 |
|                  | TN30_ERR037305                | 0 | 0          | 0 |
|                  | TN31_ERR037303                | 0 | 0          | 0 |
|                  | TN38_ERR037304                | 0 | 0          | 0 |
|                  | TN44_ERR037306                | 0 | 0          | 0 |
|                  | TN48_ERR037307                | 0 | 0          | 0 |
|                  | TN51_ERR037308                | 0 | 0          | 0 |
|                  | TN57_ERR037309                | 0 | 0          | 0 |
|                  | TN72_ERR037312                | 0 | 0          | 0 |
|                  | TN76_ERR037311                | 0 | 0          | 0 |
|                  | TN77_ERR037310                | 0 | 0          | 0 |
|                  | TN85_ERR037315                | 0 | 0          | 0 |
|                  | TN88_ERR037313                | 0 | 4.40E-39   | 0 |
|                  | TN90_ERR037316                | 0 | 0          | 0 |
|                  | Tapidor_ERR037334             | 0 | 6.28E-41   | 0 |
| BnaU01g26060.1D2 | Darmor_AUP_AOSW_2_D09BTACXX.I | 0 | 0.06225868 | 0 |
|                  | Darmor_AUP_BOSW_3_D09BTACXX.I | 0 | 2.29E-34   | 0 |
|                  | Darmor_AUP_DOSW_2_D09BTACXX.I | 0 | 7.91E-38   | 0 |
|                  | Darmor_AUP_FOSW_4_D09BTACXX.I | 0 | 0          | 0 |
|                  | Darmor_AUP_HOSW_5_D09BTACXX.I | 0 | 0          | 0 |
|                  | Darmor_AUP_IAOSW_1_1_C0UW4A   | 0 | 0          | 0 |
|                  | Darmor_AUP_KAOSW_2_1_C0UW4A   | 0 | 0          | 0 |
|                  | Darmor_AUP_LAOSW_3_1_C0UW4A   | 0 | 0          | 0 |
|                  | Darmor_AUP_MAOSW_4_1_C0UW4A   | 0 | 0          | 0 |
|                  | Darmor_AUP_NAOSW_5_1_C0UW4A   | 0 | 0          | 0 |
|                  | Darmor_AUP_PAOSW_6_1_C0UW4A   | 0 | 0.05810465 | 0 |
|                  | Ningyou_ERR037335             | 0 | 0          | 0 |
|                  | TN04_ERR037297                | 0 | 0          | 0 |

|  |                 |   |          |   |
|--|-----------------|---|----------|---|
|  | TN05_ERR037298  | 0 | 0        | 0 |
|  | TN08_ERR037301  | 0 | 0        | 0 |
|  | TN103_ERR037317 | 0 | 0        | 0 |
|  | TN108_ERR037318 | 0 | 0        | 0 |
|  | TN109_ERR037319 | 0 | 0        | 0 |
|  | TN10_ERR037294  | 0 | 0        | 0 |
|  | TN121_ERR037320 | 0 | 0        | 0 |
|  | TN124_ERR037321 | 0 | 0        | 0 |
|  | TN126_ERR037322 | 0 | 0        | 0 |
|  | TN128_ERR037323 | 0 | 0        | 0 |
|  | TN129_ERR037324 | 0 | 0        | 0 |
|  | TN12_ERR037302  | 0 | 0        | 0 |
|  | TN138_ERR037325 | 0 | 0        | 0 |
|  | TN149_ERR037326 | 0 | 0        | 0 |
|  | TN161_ERR037327 | 0 | 0        | 0 |
|  | TN163_ERR037328 | 0 | 0        | 0 |
|  | TN170_ERR037329 | 0 | 0        | 0 |
|  | TN171_ERR037332 | 0 | 0        | 0 |
|  | TN172_ERR037333 | 0 | 0        | 0 |
|  | TN176_ERR037330 | 0 | 0        | 0 |
|  | TN177_ERR037331 | 0 | 1.23E-35 | 0 |
|  | TN24_ERR037299  | 0 | 3.20E-31 | 0 |
|  | TN28_ERR037295  | 0 | 4.03E-37 | 0 |
|  | TN30_ERR037305  | 0 | 3.93E-64 | 0 |
|  | TN31_ERR037303  | 0 | 0        | 0 |
|  | TN38_ERR037304  | 0 | 0        | 0 |
|  | TN44_ERR037306  | 0 | 0        | 0 |
|  | TN48_ERR037307  | 0 | 0        | 0 |
|  | TN51_ERR037308  | 0 | 0        | 0 |
|  | TN57_ERR037309  | 0 | 0        | 0 |
|  | TN72_ERR037312  | 0 | 1.89E-41 | 0 |
|  | TN76_ERR037311  | 0 | 0        | 0 |
|  | TN77_ERR037310  | 0 | 0        | 0 |



|                  |                               |   |            |            |
|------------------|-------------------------------|---|------------|------------|
|                  | TN85_ERR037315                | 0 | 2.67E-29   | 0          |
|                  | TN88_ERR037313                | 0 | 0          | 0          |
|                  | TN90_ERR037316                | 0 | 2.05E-41   | 0          |
|                  | Tapidor_ERR037334             | 0 | 0          | 0          |
| BnaC02g07350.1D2 | Darmor_AUP_AOSW_2_D09BTACXX.I | 4 | 0.1200806  | 0.1191515  |
|                  | Darmor_AUP_BOSW_3_D09BTACXX.I | 2 | 0.08221762 | 0.08220911 |
|                  | Darmor_AUP_DOSW_2_D09BTACXX.I | 0 | 4.13E-37   | 0          |
|                  | Darmor_AUP_FOSW_4_D09BTACXX.I | 0 | 0          | 0          |
|                  | Darmor_AUP_HOSW_5_D09BTACXX.I | 1 | 0.04206064 | 0.04206064 |
|                  | Darmor_AUP_IAOSW_1_1_COUW4A   | 2 | 0.02813636 | 0.02813636 |
|                  | Darmor_AUP_KAOSW_2_1_COUW4A   | 3 | 0.0421691  | 0.0421691  |
|                  | Darmor_AUP_LAOSW_3_1_COUW4A   | 0 | 0          | 0          |
|                  | Darmor_AUP_MAOSW_4_1_COUW4A   | 0 | 0          | 0          |
|                  | Darmor_AUP_NAOSW_5_1_COUW4A   | 0 | 0          | 0          |
|                  | Darmor_AUP_PAOSW_6_1_COUW4A   | 3 | 0.03984651 | 0.03984651 |
|                  | Ningyou_ERR037335             | 0 | 2.44E-45   | 0          |
|                  | TN04_ERR037297                | 0 | 0          | 0          |
|                  | TN05_ERR037298                | 0 | 0          | 0          |
|                  | TN08_ERR037301                | 0 | 0          | 0          |
|                  | TN103_ERR037317               | 0 | 0          | 0          |
|                  | TN108_ERR037318               | 0 | 0          | 0          |
|                  | TN109_ERR037319               | 0 | 8.77E-33   | 0          |
|                  | TN10_ERR037294                | 0 | 0          | 0          |
|                  | TN121_ERR037320               | 0 | 0          | 0          |
|                  | TN124_ERR037321               | 0 | 0          | 0          |
|                  | TN126_ERR037322               | 0 | 0          | 0          |
|                  | TN128_ERR037323               | 0 | 0          | 0          |
|                  | TN129_ERR037324               | 0 | 2.05E-44   | 0          |
|                  | TN12_ERR037302                | 0 | 0          | 0          |
|                  | TN138_ERR037325               | 0 | 0          | 0          |
|                  | TN149_ERR037326               | 0 | 0          | 0          |
|                  | TN161_ERR037327               | 0 | 0          | 0          |
|                  | TN163_ERR037328               | 0 | 0          | 0          |

|                  |                               |   |          |   |
|------------------|-------------------------------|---|----------|---|
|                  | TN170_ERR037329               | 0 | 0        | 0 |
|                  | TN171_ERR037332               | 0 | 0        | 0 |
|                  | TN172_ERR037333               | 0 | 0        | 0 |
|                  | TN176_ERR037330               | 0 | 6.66E-27 | 0 |
|                  | TN177_ERR037331               | 0 | 0        | 0 |
|                  | TN24_ERR037299                | 0 | 0        | 0 |
|                  | TN28_ERR037295                | 0 | 0        | 0 |
|                  | TN30_ERR037305                | 0 | 0        | 0 |
|                  | TN31_ERR037303                | 0 | 0        | 0 |
|                  | TN38_ERR037304                | 0 | 0        | 0 |
|                  | TN44_ERR037306                | 0 | 0        | 0 |
|                  | TN48_ERR037307                | 0 | 0        | 0 |
|                  | TN51_ERR037308                | 0 | 0        | 0 |
|                  | TN57_ERR037309                | 0 | 0        | 0 |
|                  | TN72_ERR037312                | 0 | 0        | 0 |
|                  | TN76_ERR037311                | 0 | 0        | 0 |
|                  | TN77_ERR037310                | 0 | 0        | 0 |
|                  | TN85_ERR037315                | 0 | 0        | 0 |
|                  | TN88_ERR037313                | 0 | 0        | 0 |
|                  | TN90_ERR037316                | 0 | 0        | 0 |
|                  | Tapidor_ERR037334             | 0 | 0        | 0 |
| BnaA05g15540.1D2 | Darmor_AUP_AOSW_2_D09BTACXX.I | 0 | 0        | 0 |
|                  | Darmor_AUP_BOSW_3_D09BTACXX.I | 0 | 0        | 0 |
|                  | Darmor_AUP_DOSW_2_D09BTACXX.I | 0 | 0        | 0 |
|                  | Darmor_AUP_FOSW_4_D09BTACXX.I | 0 | 0        | 0 |
|                  | Darmor_AUP_HOSW_5_D09BTACXX.I | 0 | 0        | 0 |
|                  | Darmor_AUP_IAOSW_1_1_C0UW4A   | 0 | 0        | 0 |
|                  | Darmor_AUP_KAOSW_2_1_C0UW4A   | 0 | 0        | 0 |
|                  | Darmor_AUP_LAOSW_3_1_C0UW4A   | 0 | 0        | 0 |
|                  | Darmor_AUP_MAOSW_4_1_C0UW4A   | 0 | 0        | 0 |
|                  | Darmor_AUP_NAOSW_5_1_C0UW4A   | 0 | 0        | 0 |
|                  | Darmor_AUP_PAOSW_6_1_C0UW4A   | 0 | 0        | 0 |
|                  | Ningyou_ERR037335             | 0 | 0        | 0 |

|  |                 |   |   |   |
|--|-----------------|---|---|---|
|  | TN04_ERR037297  | 0 | 0 | 0 |
|  | TN05_ERR037298  | 0 | 0 | 0 |
|  | TN08_ERR037301  | 0 | 0 | 0 |
|  | TN103_ERR037317 | 0 | 0 | 0 |
|  | TN108_ERR037318 | 0 | 0 | 0 |
|  | TN109_ERR037319 | 0 | 0 | 0 |
|  | TN10_ERR037294  | 0 | 0 | 0 |
|  | TN121_ERR037320 | 0 | 0 | 0 |
|  | TN124_ERR037321 | 0 | 0 | 0 |
|  | TN126_ERR037322 | 0 | 0 | 0 |
|  | TN128_ERR037323 | 0 | 0 | 0 |
|  | TN129_ERR037324 | 0 | 0 | 0 |
|  | TN12_ERR037302  | 0 | 0 | 0 |
|  | TN138_ERR037325 | 0 | 0 | 0 |
|  | TN149_ERR037326 | 0 | 0 | 0 |
|  | TN161_ERR037327 | 0 | 0 | 0 |
|  | TN163_ERR037328 | 0 | 0 | 0 |
|  | TN170_ERR037329 | 0 | 0 | 0 |
|  | TN171_ERR037332 | 0 | 0 | 0 |
|  | TN172_ERR037333 | 0 | 0 | 0 |
|  | TN176_ERR037330 | 0 | 0 | 0 |
|  | TN177_ERR037331 | 0 | 0 | 0 |
|  | TN24_ERR037299  | 0 | 0 | 0 |
|  | TN28_ERR037295  | 0 | 0 | 0 |
|  | TN30_ERR037305  | 0 | 0 | 0 |
|  | TN31_ERR037303  | 0 | 0 | 0 |
|  | TN38_ERR037304  | 0 | 0 | 0 |
|  | TN44_ERR037306  | 0 | 0 | 0 |
|  | TN48_ERR037307  | 0 | 0 | 0 |
|  | TN51_ERR037308  | 0 | 0 | 0 |
|  | TN57_ERR037309  | 0 | 0 | 0 |
|  | TN72_ERR037312  | 0 | 0 | 0 |
|  | TN76_ERR037311  | 0 | 0 | 0 |

|                  |                               |     |           |           |
|------------------|-------------------------------|-----|-----------|-----------|
|                  | TN77_ERR037310                | 0   | 0         | 0         |
|                  | TN85_ERR037315                | 0   | 0         | 0         |
|                  | TN88_ERR037313                | 0   | 0         | 0         |
|                  | TN90_ERR037316                | 0   | 0         | 0         |
|                  | Tapidor_ERR037334             | 0   | 0         | 0         |
| BnaC02g07770.1D2 | Darmor_AUP_AOSW_2_D09BTACXX.I | 9   | 3.278829  | 0         |
|                  | Darmor_AUP_BOSW_3_D09BTACXX.I | 5   | 2.920688  | 2.096864  |
|                  | Darmor_AUP_DOSW_2_D09BTACXX.I | 9   | 7.346969  | 3.111699  |
|                  | Darmor_AUP_FOSW_4_D09BTACXX.I | 75  | 51.45008  | 39.90045  |
|                  | Darmor_AUP_HOSW_5_D09BTACXX.I | 8   | 6.731986  | 1.85505   |
|                  | Darmor_AUP_IAOSW_1_1_C0UW4A   | 17  | 0.7292452 | 0.6642075 |
|                  | Darmor_AUP_KAOSW_2_1_C0UW4A   | 25  | 1.717391  | 0.9438207 |
|                  | Darmor_AUP_LAOSW_3_1_C0UW4A   | 486 | 41.04238  | 36.27229  |
|                  | Darmor_AUP_MAOSW_4_1_C0UW4A   | 546 | 48.71424  | 43.40487  |
|                  | Darmor_AUP_NAOSW_5_1_C0UW4A   | 304 | 30.95781  | 26.53315  |
|                  | Darmor_AUP_PAOSW_6_1_C0UW4A   | 4   | 0.449109  | 0         |
|                  | Ningyou_ERR037335             | 1   | 0.182466  | 0.1823432 |
|                  | TN04_ERR037297                | 0   | 4.14E-25  | 0         |
|                  | TN05_ERR037298                | 0   | 1.21E-17  | 0         |
|                  | TN08_ERR037301                | 0   | 4.21E-26  | 0         |
|                  | TN103_ERR037317               | 0   | 4.07E-22  | 0         |
|                  | TN108_ERR037318               | 0   | 2.46E-25  | 0         |
|                  | TN109_ERR037319               | 0   | 1.69E-26  | 0         |
|                  | TN10_ERR037294                | 1   | 0.1529709 | 0         |
|                  | TN121_ERR037320               | 0   | 1.86E-26  | 0         |
|                  | TN124_ERR037321               | 0   | 3.94E-24  | 0         |
|                  | TN126_ERR037322               | 0   | 1.97E-23  | 0         |
|                  | TN128_ERR037323               | 0   | 2.22E-19  | 0         |
|                  | TN129_ERR037324               | 0   | 4.85E-22  | 0         |
|                  | TN12_ERR037302                | 0   | 7.65E-19  | 0         |
|                  | TN138_ERR037325               | 0   | 1.74E-25  | 0         |
|                  | TN149_ERR037326               | 0   | 2.69E-25  | 0         |
|                  | TN161_ERR037327               | 0   | 6.35E-26  | 0         |

|                  |                               |   |           |           |
|------------------|-------------------------------|---|-----------|-----------|
|                  | TN163_ERR037328               | 0 | 1.77E-18  | 0         |
|                  | TN170_ERR037329               | 0 | 4.99E-24  | 0         |
|                  | TN171_ERR037332               | 0 | 1.09E-20  | 0         |
|                  | TN172_ERR037333               | 1 | 0.138145  | 0.1342519 |
|                  | TN176_ERR037330               | 1 | 1.49636   | 1.473566  |
|                  | TN177_ERR037331               | 0 | 1.65E-11  | 0         |
|                  | TN24_ERR037299                | 0 | 1.38E-22  | 0         |
|                  | TN28_ERR037295                | 0 | 3.16E-11  | 0         |
|                  | TN30_ERR037305                | 0 | 1.40E-25  | 0         |
|                  | TN31_ERR037303                | 2 | 0.3266913 | 0.2750329 |
|                  | TN38_ERR037304                | 0 | 3.12E-20  | 0         |
|                  | TN44_ERR037306                | 0 | 3.46E-18  | 0         |
|                  | TN48_ERR037307                | 0 | 9.75E-24  | 0         |
|                  | TN51_ERR037308                | 0 | 9.61E-18  | 0         |
|                  | TN57_ERR037309                | 0 | 2.59E-22  | 0         |
|                  | TN72_ERR037312                | 0 | 2.72E-23  | 0         |
|                  | TN76_ERR037311                | 0 | 7.20E-20  | 0         |
|                  | TN77_ERR037310                | 0 | 4.45E-25  | 0         |
|                  | TN85_ERR037315                | 0 | 3.53E-25  | 0         |
|                  | TN88_ERR037313                | 0 | 9.83E-23  | 0         |
|                  | TN90_ERR037316                | 0 | 1.07E-22  | 0         |
|                  | Tapidor_ERR037334             | 1 | 0.1582819 | 0.1209907 |
| BnaA09g14660.1D2 | Darmor_AUP_AOSW_2_D09BTACXX.I | 0 | 0         | 0         |
|                  | Darmor_AUP_BOSW_3_D09BTACXX.I | 0 | 0         | 0         |
|                  | Darmor_AUP_DOSW_2_D09BTACXX.I | 0 | 0         | 0         |
|                  | Darmor_AUP_FOSW_4_D09BTACXX.I | 0 | 0         | 0         |
|                  | Darmor_AUP_HOSW_5_D09BTACXX.I | 0 | 0         | 0         |
|                  | Darmor_AUP_IAOSW_1_1_C0UW4A   | 0 | 0         | 0         |
|                  | Darmor_AUP_KAOSW_2_1_C0UW4A   | 0 | 0         | 0         |
|                  | Darmor_AUP_LAOSW_3_1_C0UW4A   | 0 | 0         | 0         |
|                  | Darmor_AUP_MAOSW_4_1_C0UW4A   | 0 | 0         | 0         |
|                  | Darmor_AUP_NAOSW_5_1_C0UW4A   | 0 | 0         | 0         |
|                  | Darmor_AUP_PAOSW_6_1_C0UW4A   | 0 | 0         | 0         |

|  |                   |   |   |   |
|--|-------------------|---|---|---|
|  | Ningyou_ERR037335 | 0 | 0 | 0 |
|  | TN04_ERR037297    | 0 | 0 | 0 |
|  | TN05_ERR037298    | 0 | 0 | 0 |
|  | TN08_ERR037301    | 0 | 0 | 0 |
|  | TN103_ERR037317   | 0 | 0 | 0 |
|  | TN108_ERR037318   | 0 | 0 | 0 |
|  | TN109_ERR037319   | 0 | 0 | 0 |
|  | TN10_ERR037294    | 0 | 0 | 0 |
|  | TN121_ERR037320   | 0 | 0 | 0 |
|  | TN124_ERR037321   | 0 | 0 | 0 |
|  | TN126_ERR037322   | 0 | 0 | 0 |
|  | TN128_ERR037323   | 0 | 0 | 0 |
|  | TN129_ERR037324   | 0 | 0 | 0 |
|  | TN12_ERR037302    | 0 | 0 | 0 |
|  | TN138_ERR037325   | 0 | 0 | 0 |
|  | TN149_ERR037326   | 0 | 0 | 0 |
|  | TN161_ERR037327   | 0 | 0 | 0 |
|  | TN163_ERR037328   | 0 | 0 | 0 |
|  | TN170_ERR037329   | 0 | 0 | 0 |
|  | TN171_ERR037332   | 0 | 0 | 0 |
|  | TN172_ERR037333   | 0 | 0 | 0 |
|  | TN176_ERR037330   | 0 | 0 | 0 |
|  | TN177_ERR037331   | 0 | 0 | 0 |
|  | TN24_ERR037299    | 0 | 0 | 0 |
|  | TN28_ERR037295    | 0 | 0 | 0 |
|  | TN30_ERR037305    | 0 | 0 | 0 |
|  | TN31_ERR037303    | 0 | 0 | 0 |
|  | TN38_ERR037304    | 0 | 0 | 0 |
|  | TN44_ERR037306    | 0 | 0 | 0 |
|  | TN48_ERR037307    | 0 | 0 | 0 |
|  | TN51_ERR037308    | 0 | 0 | 0 |
|  | TN57_ERR037309    | 0 | 0 | 0 |
|  | TN72_ERR037312    | 0 | 0 | 0 |

|                  |                               |   |             |   |
|------------------|-------------------------------|---|-------------|---|
|                  | TN76_ERR037311                | 0 | 0           | 0 |
|                  | TN77_ERR037310                | 0 | 0           | 0 |
|                  | TN85_ERR037315                | 0 | 0           | 0 |
|                  | TN88_ERR037313                | 0 | 0           | 0 |
|                  | TN90_ERR037316                | 0 | 0           | 0 |
|                  | Tapidor_ERR037334             | 0 | 0           | 0 |
| BnaA01g31810.1D2 | Darmor_AUP_AOSW_2_D09BTACXX.I | 0 | 3.08E-39    | 0 |
|                  | Darmor_AUP_BOSW_3_D09BTACXX.I | 0 | 2.37E-32    | 0 |
|                  | Darmor_AUP_DOSW_2_D09BTACXX.I | 0 | 3.78E-38    | 0 |
|                  | Darmor_AUP_FOSW_4_D09BTACXX.I | 0 | 0.006880779 | 0 |
|                  | Darmor_AUP_HOSW_5_D09BTACXX.I | 0 | 0.2687108   | 0 |
|                  | Darmor_AUP_IAOSW_1_1_C0UW4A   | 0 | 0           | 0 |
|                  | Darmor_AUP_KAOSW_2_1_C0UW4A   | 0 | 0           | 0 |
|                  | Darmor_AUP_LAOSW_3_1_C0UW4A   | 0 | 0           | 0 |
|                  | Darmor_AUP_MAOSW_4_1_C0UW4A   | 0 | 0.002769109 | 0 |
|                  | Darmor_AUP_NAOSW_5_1_C0UW4A   | 0 | 0           | 0 |
|                  | Darmor_AUP_PAOSW_6_1_C0UW4A   | 0 | 1.18E-48    | 0 |
|                  | Ningyou_ERR037335             | 0 | 1.88E-06    | 0 |
|                  | TN04_ERR037297                | 0 | 3.18E-43    | 0 |
|                  | TN05_ERR037298                | 0 | 3.00E-35    | 0 |
|                  | TN08_ERR037301                | 0 | 0           | 0 |
|                  | TN103_ERR037317               | 0 | 2.64E-32    | 0 |
|                  | TN108_ERR037318               | 0 | 3.07E-28    | 0 |
|                  | TN109_ERR037319               | 0 | 0           | 0 |
|                  | TN10_ERR037294                | 0 | 1.32E-37    | 0 |
|                  | TN121_ERR037320               | 0 | 5.98E-33    | 0 |
|                  | TN124_ERR037321               | 0 | 3.05E-09    | 0 |
|                  | TN126_ERR037322               | 0 | 8.86E-34    | 0 |
|                  | TN128_ERR037323               | 0 | 0           | 0 |
|                  | TN129_ERR037324               | 0 | 2.47E-25    | 0 |
|                  | TN12_ERR037302                | 0 | 1.90E-31    | 0 |
|                  | TN138_ERR037325               | 0 | 6.41E-32    | 0 |
|                  | TN149_ERR037326               | 0 | 4.88E-27    | 0 |

|                  |                               |     |             |          |
|------------------|-------------------------------|-----|-------------|----------|
|                  | TN161_ERR037327               | 0   | 2.02E-31    | 0        |
|                  | TN163_ERR037328               | 0   | 2.35E-27    | 0        |
|                  | TN170_ERR037329               | 0   | 1.25E-09    | 0        |
|                  | TN171_ERR037332               | 0   | 4.61E-35    | 0        |
|                  | TN172_ERR037333               | 0   | 6.79E-40    | 0        |
|                  | TN176_ERR037330               | 0   | 1.63E-45    | 0        |
|                  | TN177_ERR037331               | 0   | 6.50E-06    | 0        |
|                  | TN24_ERR037299                | 0   | 1.84E-25    | 0        |
|                  | TN28_ERR037295                | 0   | 2.82E-33    | 0        |
|                  | TN30_ERR037305                | 0   | 3.71E-31    | 0        |
|                  | TN31_ERR037303                | 0   | 4.06E-31    | 0        |
|                  | TN38_ERR037304                | 0   | 2.80E-35    | 0        |
|                  | TN44_ERR037306                | 0   | 0.001789722 | 0        |
|                  | TN48_ERR037307                | 0   | 1.80E-29    | 0        |
|                  | TN51_ERR037308                | 0   | 1.28E-27    | 0        |
|                  | TN57_ERR037309                | 0   | 1.29E-32    | 0        |
|                  | TN72_ERR037312                | 0   | 5.76E-32    | 0        |
|                  | TN76_ERR037311                | 0   | 7.32E-33    | 0        |
|                  | TN77_ERR037310                | 0   | 1.47E-41    | 0        |
|                  | TN85_ERR037315                | 0   | 0           | 0        |
|                  | TN88_ERR037313                | 0   | 8.18E-33    | 0        |
|                  | TN90_ERR037316                | 0   | 0           | 0        |
|                  | Tapidor_ERR037334             | 0   | 0.00150621  | 0        |
| BnaC02g10520.1D2 | Darmor_AUP_AOSW_2_D09BTACXX.I | 255 | 6.198481    | 6.175581 |
|                  | Darmor_AUP_BOSW_3_D09BTACXX.I | 579 | 17.3758     | 17.06444 |
|                  | Darmor_AUP_DOSW_2_D09BTACXX.I | 273 | 6.061403    | 5.57572  |
|                  | Darmor_AUP_FOSW_4_D09BTACXX.I | 187 | 5.191876    | 5.190859 |
|                  | Darmor_AUP_HOSW_5_D09BTACXX.I | 80  | 2.524683    | 2.523177 |
|                  | Darmor_AUP_IAOSW_1_1_COUW4A   | 467 | 4.732678    | 4.680868 |
|                  | Darmor_AUP_KAOSW_2_1_COUW4A   | 567 | 5.7592      | 5.759191 |
|                  | Darmor_AUP_LAOSW_3_1_COUW4A   | 245 | 2.365455    | 2.365455 |
|                  | Darmor_AUP_MAOSW_4_1_COUW4A   | 274 | 2.632846    | 2.632846 |
|                  | Darmor_AUP_NAOSW_5_1_COUW4A   | 283 | 2.740802    | 2.740802 |



|  |                             |     |           |           |
|--|-----------------------------|-----|-----------|-----------|
|  | Darmor_AUP_PAOSW_6_1_COUW4A | 465 | 4.539664  | 4.539663  |
|  | Ningyou_ERR037335           | 0   | 3.44E-31  | 0         |
|  | TN04_ERR037297              | 0   | 3.22E-32  | 0         |
|  | TN05_ERR037298              | 0   | 5.59E-28  | 0         |
|  | TN08_ERR037301              | 0   | 0         | 0         |
|  | TN103_ERR037317             | 0   | 1.26E-25  | 0         |
|  | TN108_ERR037318             | 0   | 2.46E-28  | 0         |
|  | TN109_ERR037319             | 0   | 2.39E-32  | 0         |
|  | TN10_ERR037294              | 1   | 0.1400114 | 0.1400114 |
|  | TN121_ERR037320             | 0   | 4.39E-31  | 0         |
|  | TN124_ERR037321             | 0   | 1.73E-32  | 0         |
|  | TN126_ERR037322             | 0   | 1.57E-27  | 0         |
|  | TN128_ERR037323             | 0   | 4.87E-33  | 0         |
|  | TN129_ERR037324             | 0   | 2.97E-28  | 0         |
|  | TN12_ERR037302              | 0   | 1.52E-32  | 0         |
|  | TN138_ERR037325             | 0   | 1.65E-31  | 0         |
|  | TN149_ERR037326             | 0   | 1.71E-25  | 0         |
|  | TN161_ERR037327             | 0   | 2.19E-32  | 0         |
|  | TN163_ERR037328             | 0   | 6.75E-26  | 0         |
|  | TN170_ERR037329             | 0   | 4.83E-33  | 0         |
|  | TN171_ERR037332             | 0   | 1.13E-27  | 0         |
|  | TN172_ERR037333             | 0   | 7.98E-27  | 0         |
|  | TN176_ERR037330             | 0   | 3.40E-30  | 0         |
|  | TN177_ERR037331             | 0   | 1.61E-32  | 0         |
|  | TN24_ERR037299              | 0   | 8.61E-23  | 0         |
|  | TN28_ERR037295              | 0   | 6.34E-32  | 0         |
|  | TN30_ERR037305              | 0   | 1.48E-27  | 0         |
|  | TN31_ERR037303              | 0   | 9.09E-33  | 0         |
|  | TN38_ERR037304              | 0   | 2.47E-27  | 0         |
|  | TN44_ERR037306              | 0   | 2.26E-30  | 0         |
|  | TN48_ERR037307              | 0   | 0         | 0         |
|  | TN51_ERR037308              | 0   | 9.08E-31  | 0         |
|  | TN57_ERR037309              | 0   | 2.36E-33  | 0         |

|                  |                               |     |           |            |
|------------------|-------------------------------|-----|-----------|------------|
|                  | TN72_ERR037312                | 0   | 1.45E-26  | 0          |
|                  | TN76_ERR037311                | 0   | 4.01E-27  | 0          |
|                  | TN77_ERR037310                | 0   | 0         | 0          |
|                  | TN85_ERR037315                | 0   | 2.86E-32  | 0          |
|                  | TN88_ERR037313                | 0   | 3.49E-30  | 0          |
|                  | TN90_ERR037316                | 0   | 1.43E-27  | 0          |
|                  | Tapidor_ERR037334             | 0   | 2.45E-28  | 0          |
| BnaC02g03370.1D2 | Darmor_AUP_AOSW_2_D09BTACXX.I | 37  | 3.385918  | 1.780796   |
|                  | Darmor_AUP_BOSW_3_D09BTACXX.I | 33  | 3.290473  | 1.528751   |
|                  | Darmor_AUP_DOSW_2_D09BTACXX.I | 54  | 4.215122  | 2.400275   |
|                  | Darmor_AUP_FOSW_4_D09BTACXX.I | 53  | 5.756592  | 4.45033    |
|                  | Darmor_AUP_HOSW_5_D09BTACXX.I | 47  | 6.57417   | 4.270597   |
|                  | Darmor_AUP_IAOSW_1_1_C0UW4A   | 120 | 2.240835  | 1.926212   |
|                  | Darmor_AUP_KAOSW_2_1_C0UW4A   | 107 | 2.566721  | 2.026766   |
|                  | Darmor_AUP_LAOSW_3_1_C0UW4A   | 100 | 3.043608  | 2.317623   |
|                  | Darmor_AUP_MAOSW_4_1_C0UW4A   | 124 | 3.488815  | 3.097148   |
|                  | Darmor_AUP_NAOSW_5_1_C0UW4A   | 89  | 2.230323  | 1.507074   |
|                  | Darmor_AUP_PAOSW_6_1_C0UW4A   | 135 | 3.289329  | 2.186153   |
|                  | Ningyou_ERR037335             | 15  | 3.677173  | 1.419031   |
|                  | TN04_ERR037297                | 9   | 0.5288692 | 0.03294517 |
|                  | TN05_ERR037298                | 9   | 1.33778   | 0.1528431  |
|                  | TN08_ERR037301                | 10  | 1.587948  | 1.024508   |
|                  | TN103_ERR037317               | 12  | 2.084146  | 0.07112644 |
|                  | TN108_ERR037318               | 9   | 2.772641  | 1.680867   |
|                  | TN109_ERR037319               | 9   | 1.703404  | 0.926589   |
|                  | TN10_ERR037294                | 8   | 0.3920883 | 0          |
|                  | TN121_ERR037320               | 10  | 0.9307568 | 0.1010623  |
|                  | TN124_ERR037321               | 11  | 0.9294572 | 0.3312731  |
|                  | TN126_ERR037322               | 9   | 0.8892498 | 0.1965928  |
|                  | TN128_ERR037323               | 0   | 1.09E-15  | 0          |
|                  | TN129_ERR037324               | 13  | 1.940466  | 0.1406476  |
|                  | TN12_ERR037302                | 11  | 0.7316539 | 0.6555316  |
|                  | TN138_ERR037325               | 10  | 1.098413  | 0.1451567  |

|                  |                               |    |           |            |
|------------------|-------------------------------|----|-----------|------------|
|                  | TN149_ERR037326               | 1  | 1.115998  | 0          |
|                  | TN161_ERR037327               | 4  | 1.0828    | 0          |
|                  | TN163_ERR037328               | 6  | 0.652399  | 0          |
|                  | TN170_ERR037329               | 18 | 2.99238   | 1.243176   |
|                  | TN171_ERR037332               | 0  | 8.24E-18  | 0          |
|                  | TN172_ERR037333               | 26 | 3.351587  | 1.693299   |
|                  | TN176_ERR037330               | 13 | 1.573632  | 0.6188133  |
|                  | TN177_ERR037331               | 3  | 0.5700647 | 0.3396167  |
|                  | TN24_ERR037299                | 0  | 4.25E-24  | 0          |
|                  | TN28_ERR037295                | 19 | 2.617638  | 0.8515422  |
|                  | TN30_ERR037305                | 8  | 0.7677376 | 0.09433958 |
|                  | TN31_ERR037303                | 14 | 2.460712  | 0.7616881  |
|                  | TN38_ERR037304                | 15 | 1.632939  | 1.118899   |
|                  | TN44_ERR037306                | 6  | 3.033562  | 0          |
|                  | TN48_ERR037307                | 11 | 1.579774  | 1.048517   |
|                  | TN51_ERR037308                | 15 | 0.9962269 | 0.6361275  |
|                  | TN57_ERR037309                | 6  | 0.6039972 | 0.3778473  |
|                  | TN72_ERR037312                | 5  | 0.4239768 | 0          |
|                  | TN76_ERR037311                | 7  | 0.6151907 | 0.1149255  |
|                  | TN77_ERR037310                | 0  | 3.90E-19  | 0          |
|                  | TN85_ERR037315                | 7  | 0.4342507 | 0          |
|                  | TN88_ERR037313                | 0  | 7.05E-14  | 0          |
|                  | TN90_ERR037316                | 4  | 0.4147017 | 0          |
|                  | Tapidor_ERR037334             | 2  | 0.1286351 | 0.01080194 |
| BnaU01g31710.1D2 | Darmor_AUP_AOSW_2_D09BTACXX.I | 0  | 7.98E-27  | 0          |
|                  | Darmor_AUP_BOSW_3_D09BTACXX.I | 0  | 3.08E-20  | 0          |
|                  | Darmor_AUP_DOSW_2_D09BTACXX.I | 0  | 3.05E-32  | 0          |
|                  | Darmor_AUP_FOSW_4_D09BTACXX.I | 0  | 1.29E-24  | 0          |
|                  | Darmor_AUP_HOSW_5_D09BTACXX.I | 0  | 3.57E-26  | 0          |
|                  | Darmor_AUP_IAOSW_1_1_COUW4A   | 0  | 0         | 0          |
|                  | Darmor_AUP_KAOSW_2_1_COUW4A   | 0  | 0         | 0          |
|                  | Darmor_AUP_LAOSW_3_1_COUW4A   | 0  | 1.61E-41  | 0          |
|                  | Darmor_AUP_MAOSW_4_1_COUW4A   | 0  | 1.84E-32  | 0          |

|  |                             |   |             |            |
|--|-----------------------------|---|-------------|------------|
|  | Darmor_AUP_NAOSW_5_1_COUW4A | 0 | 1.39E-41    | 0          |
|  | Darmor_AUP_PAOSW_6_1_COUW4A | 0 | 1.01E-31    | 0          |
|  | Ningyou_ERR037335           | 0 | 0           | 0          |
|  | TN04_ERR037297              | 0 | 1.02E-20    | 0          |
|  | TN05_ERR037298              | 0 | 0           | 0          |
|  | TN08_ERR037301              | 0 | 0           | 0          |
|  | TN103_ERR037317             | 0 | 0           | 0          |
|  | TN108_ERR037318             | 0 | 0           | 0          |
|  | TN109_ERR037319             | 0 | 0.00810339  | 0          |
|  | TN10_ERR037294              | 0 | 7.68E-07    | 0          |
|  | TN121_ERR037320             | 0 | 0.4372623   | 0.03960255 |
|  | TN124_ERR037321             | 0 | 0           | 0          |
|  | TN126_ERR037322             | 0 | 1.84E-19    | 0          |
|  | TN128_ERR037323             | 0 | 1.86E-26    | 0          |
|  | TN129_ERR037324             | 0 | 0           | 0          |
|  | TN12_ERR037302              | 0 | 8.13E-06    | 0          |
|  | TN138_ERR037325             | 0 | 0           | 0          |
|  | TN149_ERR037326             | 0 | 0           | 0          |
|  | TN161_ERR037327             | 0 | 0           | 0          |
|  | TN163_ERR037328             | 0 | 0           | 0          |
|  | TN170_ERR037329             | 0 | 0           | 0          |
|  | TN171_ERR037332             | 0 | 2.48E-19    | 0          |
|  | TN172_ERR037333             | 0 | 0           | 0          |
|  | TN176_ERR037330             | 0 | 0           | 0          |
|  | TN177_ERR037331             | 0 | 8.80E-26    | 0          |
|  | TN24_ERR037299              | 0 | 3.90E-25    | 0          |
|  | TN28_ERR037295              | 0 | 3.83E-06    | 0          |
|  | TN30_ERR037305              | 0 | 0           | 0          |
|  | TN31_ERR037303              | 0 | 2.67E-56    | 0          |
|  | TN38_ERR037304              | 0 | 0.1250446   | 0          |
|  | TN44_ERR037306              | 0 | 8.64E-21    | 0          |
|  | TN48_ERR037307              | 0 | 2.23E-22    | 0          |
|  | TN51_ERR037308              | 0 | 0.001666115 | 0          |

|                  |                               |   |             |   |
|------------------|-------------------------------|---|-------------|---|
|                  | TN57_ERR037309                | 0 | 2.94E-24    | 0 |
|                  | TN72_ERR037312                | 0 | 2.11E-24    | 0 |
|                  | TN76_ERR037311                | 0 | 8.92E-28    | 0 |
|                  | TN77_ERR037310                | 0 | 6.09E-26    | 0 |
|                  | TN85_ERR037315                | 0 | 1.67E-12    | 0 |
|                  | TN88_ERR037313                | 0 | 0           | 0 |
|                  | TN90_ERR037316                | 0 | 8.30E-22    | 0 |
|                  | Tapidor_ERR037334             | 0 | 3.53E-28    | 0 |
| BnaC05g10050.1D2 | Darmor_AUP_AOSW_2_D09BTACXX.I | 0 | 1.31E-13    | 0 |
|                  | Darmor_AUP_BOSW_3_D09BTACXX.I | 0 | 1.08E-20    | 0 |
|                  | Darmor_AUP_DOSW_2_D09BTACXX.I | 0 | 2.60E-08    | 0 |
|                  | Darmor_AUP_FOSW_4_D09BTACXX.I | 0 | 2.06E-10    | 0 |
|                  | Darmor_AUP_HOSW_5_D09BTACXX.I | 0 | 2.84E-16    | 0 |
|                  | Darmor_AUP_IAOSW_1_1_COUW4A   | 0 | 1.75E-26    | 0 |
|                  | Darmor_AUP_KAOSW_2_1_COUW4A   | 0 | 4.88E-25    | 0 |
|                  | Darmor_AUP_LAOSW_3_1_COUW4A   | 0 | 8.48E-12    | 0 |
|                  | Darmor_AUP_MAOSW_4_1_COUW4A   | 0 | 1.886234    | 0 |
|                  | Darmor_AUP_NAOSW_5_1_COUW4A   | 0 | 8.10E-17    | 0 |
|                  | Darmor_AUP_PAOSW_6_1_COUW4A   | 0 | 0.005270218 | 0 |
|                  | Ningyou_ERR037335             | 0 | 1.09E-23    | 0 |
|                  | TN04_ERR037297                | 0 | 2.45E-47    | 0 |
|                  | TN05_ERR037298                | 0 | 2.99E-38    | 0 |
|                  | TN08_ERR037301                | 0 | 1.66E-46    | 0 |
|                  | TN103_ERR037317               | 0 | 1.89E-52    | 0 |
|                  | TN108_ERR037318               | 0 | 2.57E-31    | 0 |
|                  | TN109_ERR037319               | 0 | 1.20E-44    | 0 |
|                  | TN10_ERR037294                | 0 | 7.59E-25    | 0 |
|                  | TN121_ERR037320               | 0 | 1.61E-44    | 0 |
|                  | TN124_ERR037321               | 0 | 1.77E-54    | 0 |
|                  | TN126_ERR037322               | 0 | 3.73E-24    | 0 |
|                  | TN128_ERR037323               | 0 | 3.93E-33    | 0 |
|                  | TN129_ERR037324               | 0 | 1.57E-40    | 0 |
|                  | TN12_ERR037302                | 0 | 5.66E-45    | 0 |

|                  |                               |     |          |          |
|------------------|-------------------------------|-----|----------|----------|
|                  | TN138_ERR037325               | 0   | 1.22E-61 | 0        |
|                  | TN149_ERR037326               | 0   | 0        | 0        |
|                  | TN161_ERR037327               | 0   | 1.43E-33 | 0        |
|                  | TN163_ERR037328               | 0   | 1.96E-38 | 0        |
|                  | TN170_ERR037329               | 0   | 1.92E-38 | 0        |
|                  | TN171_ERR037332               | 0   | 2.26E-66 | 0        |
|                  | TN172_ERR037333               | 0   | 9.09E-30 | 0        |
|                  | TN176_ERR037330               | 0   | 1.50E-30 | 0        |
|                  | TN177_ERR037331               | 0   | 1.03E-28 | 0        |
|                  | TN24_ERR037299                | 0   | 2.71E-38 | 0        |
|                  | TN28_ERR037295                | 0   | 8.19E-17 | 0        |
|                  | TN30_ERR037305                | 0   | 8.03E-45 | 0        |
|                  | TN31_ERR037303                | 0   | 9.10E-37 | 0        |
|                  | TN38_ERR037304                | 0   | 2.71E-44 | 0        |
|                  | TN44_ERR037306                | 0   | 2.60E-22 | 0        |
|                  | TN48_ERR037307                | 0   | 7.30E-50 | 0        |
|                  | TN51_ERR037308                | 0   | 9.14E-37 | 0        |
|                  | TN57_ERR037309                | 0   | 5.98E-65 | 0        |
|                  | TN72_ERR037312                | 0   | 8.60E-31 | 0        |
|                  | TN76_ERR037311                | 0   | 1.67E-78 | 0        |
|                  | TN77_ERR037310                | 0   | 1.81E-60 | 0        |
|                  | TN85_ERR037315                | 0   | 2.08E-47 | 0        |
|                  | TN88_ERR037313                | 0   | 9.47E-37 | 0        |
|                  | TN90_ERR037316                | 0   | 1.38E-76 | 0        |
|                  | Tapidor_ERR037334             | 0   | 1.02E-22 | 0        |
| BnaC02g03220.1D2 | Darmor_AUP_AOSW_2_D09BTACXX.I | 169 | 20.96955 | 16.96161 |
|                  | Darmor_AUP_BOSW_3_D09BTACXX.I | 197 | 30.00217 | 25.07581 |
|                  | Darmor_AUP_DOSW_2_D09BTACXX.I | 190 | 18.56191 | 15.31231 |
|                  | Darmor_AUP_FOSW_4_D09BTACXX.I | 116 | 15.77239 | 12.25229 |
|                  | Darmor_AUP_HOSW_5_D09BTACXX.I | 111 | 18.64124 | 13.96175 |
|                  | Darmor_AUP_IAOSW_1_1_C0UW4A   | 741 | 23.21722 | 21.22982 |
|                  | Darmor_AUP_KAOSW_2_1_C0UW4A   | 757 | 27.32497 | 24.66639 |
|                  | Darmor_AUP_LAOSW_3_1_C0UW4A   | 373 | 13.69043 | 12.0909  |

|  |                             |     |          |          |
|--|-----------------------------|-----|----------|----------|
|  | Darmor_AUP_MAOSW_4_1_COUW4A | 366 | 12.38897 | 10.86817 |
|  | Darmor_AUP_NAOSW_5_1_COUW4A | 335 | 11.24558 | 9.55752  |
|  | Darmor_AUP_PAOSW_6_1_COUW4A | 766 | 25.99584 | 23.59256 |
|  | Ningyou_ERR037335           | 37  | 23.23785 | 16.72781 |
|  | TN04_ERR037297              | 16  | 7.70207  | 4.657971 |
|  | TN05_ERR037298              | 45  | 17.62066 | 12.36589 |
|  | TN08_ERR037301              | 19  | 12.73978 | 7.193807 |
|  | TN103_ERR037317             | 44  | 18.03993 | 11.59847 |
|  | TN108_ERR037318             | 44  | 19.27833 | 13.04654 |
|  | TN109_ERR037319             | 54  | 24.94026 | 18.89348 |
|  | TN10_ERR037294              | 23  | 13.42443 | 8.047812 |
|  | TN121_ERR037320             | 40  | 20.45645 | 14.13355 |
|  | TN124_ERR037321             | 24  | 9.734604 | 5.362092 |
|  | TN126_ERR037322             | 32  | 13.59618 | 8.981635 |
|  | TN128_ERR037323             | 0   | 4.40E-18 | 0        |
|  | TN129_ERR037324             | 67  | 30.63373 | 24.06948 |
|  | TN12_ERR037302              | 19  | 10.60784 | 6.096238 |
|  | TN138_ERR037325             | 50  | 22.78741 | 16.28422 |
|  | TN149_ERR037326             | 27  | 8.241108 | 3.773446 |
|  | TN161_ERR037327             | 8   | 6.089457 | 1.86022  |
|  | TN163_ERR037328             | 18  | 12.53293 | 7.132315 |
|  | TN170_ERR037329             | 65  | 22.36911 | 17.45742 |
|  | TN171_ERR037332             | 0   | 1.37E-22 | 0        |
|  | TN172_ERR037333             | 53  | 20.09167 | 14.75089 |
|  | TN176_ERR037330             | 47  | 17.30037 | 12.79341 |
|  | TN177_ERR037331             | 14  | 5.816994 | 2.932144 |
|  | TN24_ERR037299              | 0   | 7.01E-16 | 0        |
|  | TN28_ERR037295              | 44  | 21.4049  | 15.53173 |
|  | TN30_ERR037305              | 28  | 16.45665 | 10.93775 |
|  | TN31_ERR037303              | 40  | 15.45619 | 10.86985 |
|  | TN38_ERR037304              | 37  | 19.79663 | 13.60916 |
|  | TN44_ERR037306              | 17  | 4.227658 | 2.386678 |
|  | TN48_ERR037307              | 20  | 13.68047 | 8.69017  |

|                  |                               |    |            |            |
|------------------|-------------------------------|----|------------|------------|
|                  | TN51_ERR037308                | 31 | 18.35626   | 10.67137   |
|                  | TN57_ERR037309                | 12 | 5.744418   | 2.194283   |
|                  | TN72_ERR037312                | 19 | 9.542981   | 5.115403   |
|                  | TN76_ERR037311                | 19 | 6.543863   | 3.66483    |
|                  | TN77_ERR037310                | 0  | 2.06E-19   | 0          |
|                  | TN85_ERR037315                | 13 | 11.73611   | 6.852141   |
|                  | TN88_ERR037313                | 0  | 1.24E-21   | 0          |
|                  | TN90_ERR037316                | 20 | 8.823033   | 4.969911   |
|                  | Tapidor_ERR037334             | 0  | 2.00E-15   | 0          |
| BnaC02g06920.1D2 | Darmor_AUP_AOSW_2_D09BTACXX.I | 2  | 0.1416902  | 0          |
|                  | Darmor_AUP_BOSW_3_D09BTACXX.I | 1  | 0.09414451 | 0.09414451 |
|                  | Darmor_AUP_DOSW_2_D09BTACXX.I | 0  | 0          | 0          |
|                  | Darmor_AUP_FOSW_4_D09BTACXX.I | 0  | 3.11E-09   | 0          |
|                  | Darmor_AUP_HOSW_5_D09BTACXX.I | 12 | 1.215308   | 0.7590646  |
|                  | Darmor_AUP_IAOSW_1_1_C0UW4A   | 0  | 0          | 0          |
|                  | Darmor_AUP_KAOSW_2_1_C0UW4A   | 1  | 0.03302563 | 0.03302563 |
|                  | Darmor_AUP_LAOSW_3_1_C0UW4A   | 0  | 0          | 0          |
|                  | Darmor_AUP_MAOSW_4_1_C0UW4A   | 0  | 0          | 0          |
|                  | Darmor_AUP_NAOSW_5_1_C0UW4A   | 0  | 0          | 0          |
|                  | Darmor_AUP_PAOSW_6_1_C0UW4A   | 1  | 0.03198871 | 0.03198871 |
|                  | Ningyou_ERR037335             | 0  | 2.44E-44   | 0          |
|                  | TN04_ERR037297                | 0  | 0          | 0          |
|                  | TN05_ERR037298                | 0  | 0          | 0          |
|                  | TN08_ERR037301                | 0  | 0          | 0          |
|                  | TN103_ERR037317               | 0  | 0          | 0          |
|                  | TN108_ERR037318               | 0  | 0          | 0          |
|                  | TN109_ERR037319               | 0  | 0          | 0          |
|                  | TN10_ERR037294                | 0  | 2.38E-31   | 0          |
|                  | TN121_ERR037320               | 0  | 0          | 0          |
|                  | TN124_ERR037321               | 0  | 0          | 0          |
|                  | TN126_ERR037322               | 0  | 0          | 0          |
|                  | TN128_ERR037323               | 0  | 7.38E-33   | 0          |
|                  | TN129_ERR037324               | 0  | 1.12E-23   | 0          |



|                  |                               |    |           |           |
|------------------|-------------------------------|----|-----------|-----------|
|                  | TN12_ERR037302                | 0  | 1.07E-42  | 0         |
|                  | TN138_ERR037325               | 0  | 7.25E-44  | 0         |
|                  | TN149_ERR037326               | 0  | 0         | 0         |
|                  | TN161_ERR037327               | 0  | 0         | 0         |
|                  | TN163_ERR037328               | 0  | 0         | 0         |
|                  | TN170_ERR037329               | 0  | 0         | 0         |
|                  | TN171_ERR037332               | 0  | 0         | 0         |
|                  | TN172_ERR037333               | 0  | 2.74E-43  | 0         |
|                  | TN176_ERR037330               | 0  | 3.51E-42  | 0         |
|                  | TN177_ERR037331               | 0  | 0         | 0         |
|                  | TN24_ERR037299                | 0  | 7.03E-41  | 0         |
|                  | TN28_ERR037295                | 0  | 1.06E-54  | 0         |
|                  | TN30_ERR037305                | 0  | 4.01E-45  | 0         |
|                  | TN31_ERR037303                | 0  | 0         | 0         |
|                  | TN38_ERR037304                | 0  | 1.36E-35  | 0         |
|                  | TN44_ERR037306                | 0  | 0         | 0         |
|                  | TN48_ERR037307                | 0  | 0         | 0         |
|                  | TN51_ERR037308                | 0  | 5.03E-40  | 0         |
|                  | TN57_ERR037309                | 0  | 0         | 0         |
|                  | TN72_ERR037312                | 0  | 0         | 0         |
|                  | TN76_ERR037311                | 0  | 1.61E-33  | 0         |
|                  | TN77_ERR037310                | 0  | 0         | 0         |
|                  | TN85_ERR037315                | 0  | 3.09E-51  | 0         |
|                  | TN88_ERR037313                | 0  | 2.25E-43  | 0         |
|                  | TN90_ERR037316                | 0  | 0         | 0         |
|                  | Tapidor_ERR037334             | 0  | 0         | 0         |
| BnaC02g04350.1D2 | Darmor_AUP_AOSW_2_D09BTACXX.I | 24 | 0.8937709 | 0.3863646 |
|                  | Darmor_AUP_BOSW_3_D09BTACXX.I | 41 | 1.659599  | 1.587123  |
|                  | Darmor_AUP_DOSW_2_D09BTACXX.I | 84 | 3.108633  | 2.249533  |
|                  | Darmor_AUP_FOSW_4_D09BTACXX.I | 64 | 2.74      | 2.612317  |
|                  | Darmor_AUP_HOSW_5_D09BTACXX.I | 46 | 1.823216  | 1.796875  |
|                  | Darmor_AUP_IAOSW_1_1_C0UW4A   | 51 | 0.6569947 | 0.6569947 |
|                  | Darmor_AUP_KAOSW_2_1_C0UW4A   | 45 | 0.5850607 | 0.5846903 |

|  |                             |    |           |            |
|--|-----------------------------|----|-----------|------------|
|  | Darmor_AUP_LAOSW_3_1_COUW4A | 95 | 1.299188  | 1.244231   |
|  | Darmor_AUP_MAOSW_4_1_COUW4A | 90 | 1.289147  | 1.289081   |
|  | Darmor_AUP_NAOSW_5_1_COUW4A | 75 | 1.062947  | 0.9810717  |
|  | Darmor_AUP_PAOSW_6_1_COUW4A | 66 | 0.8919591 | 0.8919591  |
|  | Ningyou_ERR037335           | 28 | 2.331818  | 1.950158   |
|  | TN04_ERR037297              | 15 | 0.6799302 | 0.6772901  |
|  | TN05_ERR037298              | 38 | 2.227954  | 2.086886   |
|  | TN08_ERR037301              | 7  | 0.3410532 | 0.3206014  |
|  | TN103_ERR037317             | 13 | 0.8443124 | 0.3697962  |
|  | TN108_ERR037318             | 19 | 1.302149  | 0.8698711  |
|  | TN109_ERR037319             | 44 | 2.566087  | 1.517514   |
|  | TN10_ERR037294              | 16 | 0.9091798 | 0.8402331  |
|  | TN121_ERR037320             | 26 | 1.649769  | 0.6736957  |
|  | TN124_ERR037321             | 10 | 0.3892028 | 0.3889339  |
|  | TN126_ERR037322             | 33 | 1.747416  | 1.465549   |
|  | TN128_ERR037323             | 0  | 7.01E-30  | 0          |
|  | TN129_ERR037324             | 30 | 1.50935   | 1.352831   |
|  | TN12_ERR037302              | 19 | 1.448127  | 0.6637716  |
|  | TN138_ERR037325             | 22 | 1.723771  | 0.08067859 |
|  | TN149_ERR037326             | 14 | 1.010547  | 0.966189   |
|  | TN161_ERR037327             | 4  | 0.213289  | 0.2052732  |
|  | TN163_ERR037328             | 15 | 0.8149331 | 0.6855029  |
|  | TN170_ERR037329             | 33 | 1.745697  | 1.524618   |
|  | TN171_ERR037332             | 0  | 2.92E-17  | 0          |
|  | TN172_ERR037333             | 16 | 0.9491174 | 0.6377404  |
|  | TN176_ERR037330             | 24 | 1.321613  | 1.198966   |
|  | TN177_ERR037331             | 10 | 0.4208537 | 0.3998442  |
|  | TN24_ERR037299              | 0  | 1.50E-27  | 0          |
|  | TN28_ERR037295              | 27 | 1.345845  | 1.342792   |
|  | TN30_ERR037305              | 24 | 1.651419  | 1.238783   |
|  | TN31_ERR037303              | 10 | 0.9458498 | 0          |
|  | TN38_ERR037304              | 34 | 1.8531    | 1.795574   |
|  | TN44_ERR037306              | 10 | 0.6486333 | 0.6486332  |

|                  |                               |     |           |           |
|------------------|-------------------------------|-----|-----------|-----------|
|                  | TN48_ERR037307                | 14  | 1.072789  | 0.1618884 |
|                  | TN51_ERR037308                | 19  | 1.339832  | 1.125904  |
|                  | TN57_ERR037309                | 8   | 0.4500798 | 0.449978  |
|                  | TN72_ERR037312                | 14  | 1.033328  | 0.1973336 |
|                  | TN76_ERR037311                | 12  | 0.6968725 | 0.6945083 |
|                  | TN77_ERR037310                | 0   | 3.38E-28  | 0         |
|                  | TN85_ERR037315                | 17  | 1.617145  | 0.8310468 |
|                  | TN88_ERR037313                | 0   | 1.31E-26  | 0         |
|                  | TN90_ERR037316                | 12  | 0.8151158 | 0         |
|                  | Tapidor_ERR037334             | 0   | 1.33E-27  | 0         |
| BnaC03g02100.1D2 | Darmor_AUP_AOSW_2_D09BTACXX.I | 92  | 2.292845  | 2.179446  |
|                  | Darmor_AUP_BOSW_3_D09BTACXX.I | 141 | 4.777481  | 4.672142  |
|                  | Darmor_AUP_DOSW_2_D09BTACXX.I | 201 | 5.317728  | 4.491087  |
|                  | Darmor_AUP_FOSW_4_D09BTACXX.I | 41  | 1.18529   | 0.5649439 |
|                  | Darmor_AUP_HOSW_5_D09BTACXX.I | 175 | 6.237941  | 5.641443  |
|                  | Darmor_AUP_IAOSW_1_1_C0UW4A   | 240 | 2.968271  | 2.968271  |
|                  | Darmor_AUP_KAOSW_2_1_C0UW4A   | 165 | 2.039423  | 2.038511  |
|                  | Darmor_AUP_LAOSW_3_1_C0UW4A   | 37  | 0.4391514 | 0.4391326 |
|                  | Darmor_AUP_MAOSW_4_1_C0UW4A   | 59  | 0.6986326 | 0.6986326 |
|                  | Darmor_AUP_NAOSW_5_1_C0UW4A   | 55  | 0.6756692 | 0.6756692 |
|                  | Darmor_AUP_PAOSW_6_1_C0UW4A   | 216 | 2.66888   | 2.651218  |
|                  | Ningyou_ERR037335             | 7   | 0.753297  | 0.5341889 |
|                  | TN04_ERR037297                | 0   | 4.91E-24  | 0         |
|                  | TN05_ERR037298                | 0   | 8.35E-29  | 0         |
|                  | TN08_ERR037301                | 0   | 7.02E-32  | 0         |
|                  | TN103_ERR037317               | 0   | 5.97E-17  | 0         |
|                  | TN108_ERR037318               | 0   | 7.00E-27  | 0         |
|                  | TN109_ERR037319               | 0   | 7.11E-31  | 0         |
|                  | TN10_ERR037294                | 0   | 5.27E-30  | 0         |
|                  | TN121_ERR037320               | 0   | 3.94E-31  | 0         |
|                  | TN124_ERR037321               | 0   | 1.82E-26  | 0         |
|                  | TN126_ERR037322               | 0   | 4.72E-24  | 0         |
|                  | TN128_ERR037323               | 0   | 2.77E-27  | 0         |

|                  |                               |     |            |            |
|------------------|-------------------------------|-----|------------|------------|
|                  | TN129_ERR037324               | 0   | 1.09E-12   | 0          |
|                  | TN12_ERR037302                | 0   | 6.54E-27   | 0          |
|                  | TN138_ERR037325               | 0   | 2.71E-16   | 0          |
|                  | TN149_ERR037326               | 0   | 7.20E-32   | 0          |
|                  | TN161_ERR037327               | 16  | 0.7581255  | 0.06123296 |
|                  | TN163_ERR037328               | 4   | 0.1553289  | 0.107052   |
|                  | TN170_ERR037329               | 0   | 1.48E-20   | 0          |
|                  | TN171_ERR037332               | 0   | 1.69E-30   | 0          |
|                  | TN172_ERR037333               | 0   | 2.97E-27   | 0          |
|                  | TN176_ERR037330               | 0   | 1.23E-29   | 0          |
|                  | TN177_ERR037331               | 0   | 5.72E-28   | 0          |
|                  | TN24_ERR037299                | 0   | 9.44E-25   | 0          |
|                  | TN28_ERR037295                | 0   | 2.92E-26   | 0          |
|                  | TN30_ERR037305                | 0   | 4.54E-27   | 0          |
|                  | TN31_ERR037303                | 12  | 0.4728734  | 0.4719394  |
|                  | TN38_ERR037304                | 2   | 0.08448883 | 0.0840634  |
|                  | TN44_ERR037306                | 0   | 1.43E-27   | 0          |
|                  | TN48_ERR037307                | 0   | 3.75E-26   | 0          |
|                  | TN51_ERR037308                | 10  | 0.5104325  | 0.5083398  |
|                  | TN57_ERR037309                | 22  | 1.314837   | 0.9122036  |
|                  | TN72_ERR037312                | 1   | 0.04255361 | 0.04237481 |
|                  | TN76_ERR037311                | 0   | 1.41E-30   | 0          |
|                  | TN77_ERR037310                | 22  | 1.084934   | 1.036147   |
|                  | TN85_ERR037315                | 0   | 1.22E-30   | 0          |
|                  | TN88_ERR037313                | 0   | 1.51E-05   | 1.51E-05   |
|                  | TN90_ERR037316                | 0   | 5.29E-18   | 0          |
|                  | Tapidor_ERR037334             | 0   | 6.02E-26   | 0          |
| BnaC02g05440.1D2 | Darmor_AUP_AOSW_2_D09BTACXX.I | 71  | 1.338373   | 1.013472   |
|                  | Darmor_AUP_BOSW_3_D09BTACXX.I | 45  | 0.7859965  | 0.6078124  |
|                  | Darmor_AUP_DOSW_2_D09BTACXX.I | 272 | 4.712979   | 4.004203   |
|                  | Darmor_AUP_FOSW_4_D09BTACXX.I | 554 | 10.09104   | 9.161122   |
|                  | Darmor_AUP_HOSW_5_D09BTACXX.I | 287 | 7.625237   | 6.723359   |
|                  | Darmor_AUP_IAOSW_1_1_COUW4AC  | 150 | 0.9391342  | 0.7108083  |

|  |                             |      |           |           |
|--|-----------------------------|------|-----------|-----------|
|  | Darmor_AUP_KAOSW_2_1_COUW4A | 245  | 1.503172  | 1.240554  |
|  | Darmor_AUP_LAOSW_3_1_COUW4A | 908  | 6.94229   | 6.47645   |
|  | Darmor_AUP_MAOSW_4_1_COUW4A | 1006 | 6.774535  | 6.337306  |
|  | Darmor_AUP_NAOSW_5_1_COUW4A | 836  | 5.791434  | 5.325412  |
|  | Darmor_AUP_PAOSW_6_1_COUW4A | 185  | 1.247655  | 1.090511  |
|  | Ningyou_ERR037335           | 92   | 4.436809  | 3.112474  |
|  | TN04_ERR037297              | 41   | 1.372154  | 1.07304   |
|  | TN05_ERR037298              | 35   | 1.32158   | 0.5683977 |
|  | TN08_ERR037301              | 39   | 2.171228  | 1.244266  |
|  | TN103_ERR037317             | 30   | 1.566122  | 0.9013454 |
|  | TN108_ERR037318             | 61   | 2.988277  | 1.854379  |
|  | TN109_ERR037319             | 37   | 1.508052  | 1.117087  |
|  | TN10_ERR037294              | 76   | 2.980434  | 2.115144  |
|  | TN121_ERR037320             | 47   | 1.795502  | 1.127892  |
|  | TN124_ERR037321             | 64   | 2.213752  | 1.453065  |
|  | TN126_ERR037322             | 57   | 2.109695  | 1.356265  |
|  | TN128_ERR037323             | 21   | 0.3597158 | 0.2050726 |
|  | TN129_ERR037324             | 56   | 1.810289  | 1.120609  |
|  | TN12_ERR037302              | 20   | 1.017919  | 0.4141487 |
|  | TN138_ERR037325             | 38   | 1.717894  | 0.730578  |
|  | TN149_ERR037326             | 51   | 2.350522  | 1.602281  |
|  | TN161_ERR037327             | 32   | 1.119221  | 0.3829264 |
|  | TN163_ERR037328             | 80   | 3.140814  | 2.31996   |
|  | TN170_ERR037329             | 120  | 4.36331   | 3.400778  |
|  | TN171_ERR037332             | 23   | 0.7808509 | 0.7177589 |
|  | TN172_ERR037333             | 160  | 5.817521  | 4.674199  |
|  | TN176_ERR037330             | 142  | 4.179513  | 3.391567  |
|  | TN177_ERR037331             | 44   | 2.264407  | 1.418622  |
|  | TN24_ERR037299              | 24   | 0.8262458 | 0.6093173 |
|  | TN28_ERR037295              | 61   | 1.660888  | 1.111439  |
|  | TN30_ERR037305              | 30   | 1.094804  | 0.8189088 |
|  | TN31_ERR037303              | 82   | 2.816818  | 2.18869   |
|  | TN38_ERR037304              | 27   | 1.432892  | 1.404864  |

|                  |                               |    |           |           |
|------------------|-------------------------------|----|-----------|-----------|
|                  | TN44_ERR037306                | 23 | 1.447145  | 0.6942377 |
|                  | TN48_ERR037307                | 61 | 1.788088  | 1.17161   |
|                  | TN51_ERR037308                | 59 | 3.510073  | 2.459963  |
|                  | TN57_ERR037309                | 52 | 2.215532  | 1.490365  |
|                  | TN72_ERR037312                | 49 | 1.710071  | 1.042962  |
|                  | TN76_ERR037311                | 33 | 0.6770253 | 0.326686  |
|                  | TN77_ERR037310                | 22 | 0.4308206 | 0.3748604 |
|                  | TN85_ERR037315                | 32 | 1.522494  | 0.8121371 |
|                  | TN88_ERR037313                | 29 | 0.5384924 | 0.3773688 |
|                  | TN90_ERR037316                | 42 | 1.889933  | 1.328351  |
|                  | Tapidor_ERR037334             | 27 | 0.5339163 | 0.2939051 |
| BnaC07g30540.1D2 | Darmor_AUP_AOSW_2_D09BTACXX.I | 0  | 0         | 0         |
|                  | Darmor_AUP_BOSW_3_D09BTACXX.I | 0  | 0         | 0         |
|                  | Darmor_AUP_DOSW_2_D09BTACXX.I | 0  | 0         | 0         |
|                  | Darmor_AUP_FOSW_4_D09BTACXX.I | 0  | 0         | 0         |
|                  | Darmor_AUP_HOSW_5_D09BTACXX.I | 0  | 0         | 0         |
|                  | Darmor_AUP_IAOSW_1_1_C0UW4A   | 0  | 0         | 0         |
|                  | Darmor_AUP_KAOSW_2_1_C0UW4A   | 0  | 0         | 0         |
|                  | Darmor_AUP_LAOSW_3_1_C0UW4A   | 0  | 0         | 0         |
|                  | Darmor_AUP_MAOSW_4_1_C0UW4A   | 0  | 0         | 0         |
|                  | Darmor_AUP_NAOSW_5_1_C0UW4A   | 0  | 0         | 0         |
|                  | Darmor_AUP_PAOSW_6_1_C0UW4A   | 0  | 3.79E-10  | 0         |
|                  | Ningyou_ERR037335             | 0  | 0         | 0         |
|                  | TN04_ERR037297                | 0  | 0         | 0         |
|                  | TN05_ERR037298                | 0  | 0         | 0         |
|                  | TN08_ERR037301                | 0  | 0         | 0         |
|                  | TN103_ERR037317               | 1  | 0.1368345 | 0.1368345 |
|                  | TN108_ERR037318               | 0  | 0         | 0         |
|                  | TN109_ERR037319               | 0  | 0         | 0         |
|                  | TN10_ERR037294                | 0  | 0         | 0         |
|                  | TN121_ERR037320               | 0  | 0         | 0         |
|                  | TN124_ERR037321               | 0  | 0         | 0         |
|                  | TN126_ERR037322               | 0  | 0         | 0         |

|                  |                               |     |            |            |
|------------------|-------------------------------|-----|------------|------------|
|                  | TN128_ERR037323               | 0   | 0          | 0          |
|                  | TN129_ERR037324               | 0   | 0          | 0          |
|                  | TN12_ERR037302                | 0   | 0          | 0          |
|                  | TN138_ERR037325               | 0   | 0          | 0          |
|                  | TN149_ERR037326               | 0   | 0          | 0          |
|                  | TN161_ERR037327               | 0   | 0          | 0          |
|                  | TN163_ERR037328               | 0   | 0          | 0          |
|                  | TN170_ERR037329               | 0   | 0          | 0          |
|                  | TN171_ERR037332               | 0   | 0          | 0          |
|                  | TN172_ERR037333               | 2   | 0.0924063  | 0.0924063  |
|                  | TN176_ERR037330               | 0   | 0          | 0          |
|                  | TN177_ERR037331               | 0   | 0          | 0          |
|                  | TN24_ERR037299                | 0   | 0          | 0          |
|                  | TN28_ERR037295                | 0   | 0          | 0          |
|                  | TN30_ERR037305                | 0   | 0          | 0          |
|                  | TN31_ERR037303                | 0   | 0          | 0          |
|                  | TN38_ERR037304                | 0   | 0          | 0          |
|                  | TN44_ERR037306                | 0   | 0          | 0          |
|                  | TN48_ERR037307                | 0   | 0          | 0          |
|                  | TN51_ERR037308                | 0   | 0          | 0          |
|                  | TN57_ERR037309                | 0   | 0          | 0          |
|                  | TN72_ERR037312                | 0   | 0          | 0          |
|                  | TN76_ERR037311                | 0   | 0          | 0          |
|                  | TN77_ERR037310                | 0   | 0          | 0          |
|                  | TN85_ERR037315                | 0   | 0          | 0          |
|                  | TN88_ERR037313                | 0   | 0          | 0          |
|                  | TN90_ERR037316                | 0   | 0          | 0          |
|                  | Tapidor_ERR037334             | 0   | 0          | 0          |
| BnaC02g07840.1D2 | Darmor_AUP_AOSW_2_D09BTACXX.I | 0   | 0.02014586 | 0.02012992 |
|                  | Darmor_AUP_BOSW_3_D09BTACXX.I | 1   | 0.0278033  | 0.0278033  |
|                  | Darmor_AUP_DOSW_2_D09BTACXX.I | 0   | 0          | 0          |
|                  | Darmor_AUP_FOSW_4_D09BTACXX.I | 0   | 0          | 0          |
|                  | Darmor_AUP_HOSW_5_D09BTACXX.I | 101 | 2.709835   | 2.500379   |

|                             |   |             |             |
|-----------------------------|---|-------------|-------------|
| Darmor_AUP_IAOSW_1_1_COUW4A | 1 | 0.009116795 | 0.009116795 |
| Darmor_AUP_KAOSW_2_1_COUW4A | 2 | 0.01863739  | 0.01863739  |
| Darmor_AUP_LAOSW_3_1_COUW4A | 0 | 0           | 0           |
| Darmor_AUP_MAOSW_4_1_COUW4A | 0 | 0           | 0           |
| Darmor_AUP_NAOSW_5_1_COUW4A | 0 | 0           | 0           |
| Darmor_AUP_PAOSW_6_1_COUW4A | 1 | 0.00978798  | 0.00978798  |
| Ningyou_ERR037335           | 0 | 0           | 0           |
| TN04_ERR037297              | 0 | 0           | 0           |
| TN05_ERR037298              | 0 | 0           | 0           |
| TN08_ERR037301              | 0 | 0           | 0           |
| TN103_ERR037317             | 0 | 0           | 0           |
| TN108_ERR037318             | 0 | 0           | 0           |
| TN109_ERR037319             | 0 | 0           | 0           |
| TN10_ERR037294              | 0 | 0           | 0           |
| TN121_ERR037320             | 0 | 0           | 0           |
| TN124_ERR037321             | 0 | 0           | 0           |
| TN126_ERR037322             | 0 | 0           | 0           |
| TN128_ERR037323             | 0 | 0           | 0           |
| TN129_ERR037324             | 0 | 0           | 0           |
| TN12_ERR037302              | 0 | 0           | 0           |
| TN138_ERR037325             | 0 | 0.01435075  | 0           |
| TN149_ERR037326             | 0 | 0           | 0           |
| TN161_ERR037327             | 0 | 0           | 0           |
| TN163_ERR037328             | 0 | 0           | 0           |
| TN170_ERR037329             | 0 | 0           | 0           |
| TN171_ERR037332             | 0 | 0           | 0           |
| TN172_ERR037333             | 0 | 0           | 0           |
| TN176_ERR037330             | 0 | 0           | 0           |
| TN177_ERR037331             | 0 | 0           | 0           |
| TN24_ERR037299              | 0 | 0           | 0           |
| TN28_ERR037295              | 0 | 0           | 0           |
| TN30_ERR037305              | 0 | 0           | 0           |
| TN31_ERR037303              | 0 | 0           | 0           |



|                  |                               |   |          |   |
|------------------|-------------------------------|---|----------|---|
|                  | TN38_ERR037304                | 0 | 0        | 0 |
|                  | TN44_ERR037306                | 0 | 0        | 0 |
|                  | TN48_ERR037307                | 0 | 0        | 0 |
|                  | TN51_ERR037308                | 0 | 0        | 0 |
|                  | TN57_ERR037309                | 0 | 0        | 0 |
|                  | TN72_ERR037312                | 0 | 0        | 0 |
|                  | TN76_ERR037311                | 0 | 3.61E-06 | 0 |
|                  | TN77_ERR037310                | 0 | 0        | 0 |
|                  | TN85_ERR037315                | 0 | 0        | 0 |
|                  | TN88_ERR037313                | 0 | 0        | 0 |
|                  | TN90_ERR037316                | 0 | 0        | 0 |
|                  | Tapidor_ERR037334             | 0 | 0        | 0 |
| BnaC02g10350.1D2 | Darmor_AUP_AOSW_2_D09BTACXX.I | 0 | 0        | 0 |
|                  | Darmor_AUP_BOSW_3_D09BTACXX.I | 0 | 0        | 0 |
|                  | Darmor_AUP_DOSW_2_D09BTACXX.I | 0 | 0        | 0 |
|                  | Darmor_AUP_FOSW_4_D09BTACXX.I | 0 | 0        | 0 |
|                  | Darmor_AUP_HOSW_5_D09BTACXX.I | 0 | 0        | 0 |
|                  | Darmor_AUP_IAOSW_1_1_C0UW4A   | 0 | 0        | 0 |
|                  | Darmor_AUP_KAOSW_2_1_C0UW4A   | 0 | 0        | 0 |
|                  | Darmor_AUP_LAOSW_3_1_C0UW4A   | 0 | 0        | 0 |
|                  | Darmor_AUP_MAOSW_4_1_C0UW4A   | 0 | 0        | 0 |
|                  | Darmor_AUP_NAOSW_5_1_C0UW4A   | 0 | 0        | 0 |
|                  | Darmor_AUP_PAOSW_6_1_C0UW4A   | 0 | 0        | 0 |
|                  | Ningyou_ERR037335             | 0 | 0        | 0 |
|                  | TN04_ERR037297                | 0 | 0        | 0 |
|                  | TN05_ERR037298                | 0 | 0        | 0 |
|                  | TN08_ERR037301                | 0 | 0        | 0 |
|                  | TN103_ERR037317               | 0 | 0        | 0 |
|                  | TN108_ERR037318               | 0 | 0        | 0 |
|                  | TN109_ERR037319               | 0 | 0        | 0 |
|                  | TN10_ERR037294                | 0 | 0        | 0 |
|                  | TN121_ERR037320               | 0 | 0        | 0 |
|                  | TN124_ERR037321               | 0 | 0        | 0 |

|                  |                               |   |             |   |
|------------------|-------------------------------|---|-------------|---|
|                  | TN126_ERR037322               | 0 | 0           | 0 |
|                  | TN128_ERR037323               | 0 | 0           | 0 |
|                  | TN129_ERR037324               | 0 | 0           | 0 |
|                  | TN12_ERR037302                | 0 | 0           | 0 |
|                  | TN138_ERR037325               | 0 | 0           | 0 |
|                  | TN149_ERR037326               | 0 | 0           | 0 |
|                  | TN161_ERR037327               | 0 | 0           | 0 |
|                  | TN163_ERR037328               | 0 | 0           | 0 |
|                  | TN170_ERR037329               | 0 | 0           | 0 |
|                  | TN171_ERR037332               | 0 | 0           | 0 |
|                  | TN172_ERR037333               | 0 | 0           | 0 |
|                  | TN176_ERR037330               | 0 | 0           | 0 |
|                  | TN177_ERR037331               | 0 | 0           | 0 |
|                  | TN24_ERR037299                | 0 | 0           | 0 |
|                  | TN28_ERR037295                | 0 | 0           | 0 |
|                  | TN30_ERR037305                | 0 | 0           | 0 |
|                  | TN31_ERR037303                | 0 | 0           | 0 |
|                  | TN38_ERR037304                | 0 | 0           | 0 |
|                  | TN44_ERR037306                | 0 | 0           | 0 |
|                  | TN48_ERR037307                | 0 | 0           | 0 |
|                  | TN51_ERR037308                | 0 | 0           | 0 |
|                  | TN57_ERR037309                | 0 | 0           | 0 |
|                  | TN72_ERR037312                | 0 | 0           | 0 |
|                  | TN76_ERR037311                | 0 | 0           | 0 |
|                  | TN77_ERR037310                | 0 | 0           | 0 |
|                  | TN85_ERR037315                | 0 | 0           | 0 |
|                  | TN88_ERR037313                | 0 | 0           | 0 |
|                  | TN90_ERR037316                | 0 | 0           | 0 |
|                  | Tapidor_ERR037334             | 0 | 0           | 0 |
| BnaA01g31800.1D2 | Darmor_AUP_AOSW_2_D09BTACXX.I | 0 | 3.08E-39    | 0 |
|                  | Darmor_AUP_BOSW_3_D09BTACXX.I | 0 | 2.37E-32    | 0 |
|                  | Darmor_AUP_DOSW_2_D09BTACXX.I | 0 | 3.78E-38    | 0 |
|                  | Darmor_AUP_FOSW_4_D09BTACXX.I | 0 | 0.006880779 | 0 |

|  |                               |   |             |   |
|--|-------------------------------|---|-------------|---|
|  | Darmor_AUP_HOSW_5_D09BTACXX.I | 0 | 0.2687108   | 0 |
|  | Darmor_AUP_IAOSW_1_1_COUW4A   | 0 | 0           | 0 |
|  | Darmor_AUP_KAOSW_2_1_COUW4A   | 0 | 0           | 0 |
|  | Darmor_AUP_LAOSW_3_1_COUW4A   | 0 | 0           | 0 |
|  | Darmor_AUP_MAOSW_4_1_COUW4A   | 0 | 0.002769109 | 0 |
|  | Darmor_AUP_NAOSW_5_1_COUW4A   | 0 | 0           | 0 |
|  | Darmor_AUP_PAOSW_6_1_COUW4A   | 0 | 1.18E-48    | 0 |
|  | Ningyou_ERR037335             | 0 | 1.88E-06    | 0 |
|  | TN04_ERR037297                | 0 | 3.18E-43    | 0 |
|  | TN05_ERR037298                | 0 | 3.00E-35    | 0 |
|  | TN08_ERR037301                | 0 | 0           | 0 |
|  | TN103_ERR037317               | 0 | 2.64E-32    | 0 |
|  | TN108_ERR037318               | 0 | 3.07E-28    | 0 |
|  | TN109_ERR037319               | 0 | 0           | 0 |
|  | TN10_ERR037294                | 0 | 1.32E-37    | 0 |
|  | TN121_ERR037320               | 0 | 5.98E-33    | 0 |
|  | TN124_ERR037321               | 0 | 3.05E-09    | 0 |
|  | TN126_ERR037322               | 0 | 8.86E-34    | 0 |
|  | TN128_ERR037323               | 0 | 0           | 0 |
|  | TN129_ERR037324               | 0 | 2.47E-25    | 0 |
|  | TN12_ERR037302                | 0 | 1.90E-31    | 0 |
|  | TN138_ERR037325               | 0 | 6.41E-32    | 0 |
|  | TN149_ERR037326               | 0 | 4.88E-27    | 0 |
|  | TN161_ERR037327               | 0 | 2.02E-31    | 0 |
|  | TN163_ERR037328               | 0 | 2.35E-27    | 0 |
|  | TN170_ERR037329               | 0 | 1.25E-09    | 0 |
|  | TN171_ERR037332               | 0 | 4.61E-35    | 0 |
|  | TN172_ERR037333               | 0 | 6.79E-40    | 0 |
|  | TN176_ERR037330               | 0 | 1.63E-45    | 0 |
|  | TN177_ERR037331               | 0 | 6.50E-06    | 0 |
|  | TN24_ERR037299                | 0 | 1.84E-25    | 0 |
|  | TN28_ERR037295                | 0 | 2.82E-33    | 0 |
|  | TN30_ERR037305                | 0 | 3.71E-31    | 0 |

|                  |                               |      |             |           |
|------------------|-------------------------------|------|-------------|-----------|
|                  | TN31_ERR037303                | 0    | 4.06E-31    | 0         |
|                  | TN38_ERR037304                | 0    | 2.80E-35    | 0         |
|                  | TN44_ERR037306                | 0    | 0.001789722 | 0         |
|                  | TN48_ERR037307                | 0    | 1.80E-29    | 0         |
|                  | TN51_ERR037308                | 0    | 1.28E-27    | 0         |
|                  | TN57_ERR037309                | 0    | 1.29E-32    | 0         |
|                  | TN72_ERR037312                | 0    | 5.76E-32    | 0         |
|                  | TN76_ERR037311                | 0    | 7.32E-33    | 0         |
|                  | TN77_ERR037310                | 0    | 1.47E-41    | 0         |
|                  | TN85_ERR037315                | 0    | 0           | 0         |
|                  | TN88_ERR037313                | 0    | 8.18E-33    | 0         |
|                  | TN90_ERR037316                | 0    | 0           | 0         |
|                  | Tapidor_ERR037334             | 0    | 0.00150621  | 0         |
| BnaC02g07440.1D2 | Darmor_AUP_AOSW_2_D09BTACXX.I | 688  | 28.73316    | 27.28556  |
|                  | Darmor_AUP_BOSW_3_D09BTACXX.I | 449  | 20.42459    | 19.198    |
|                  | Darmor_AUP_DOSW_2_D09BTACXX.I | 1020 | 34.38396    | 32.73035  |
|                  | Darmor_AUP_FOSW_4_D09BTACXX.I | 226  | 9.405085    | 8.212166  |
|                  | Darmor_AUP_HOSW_5_D09BTACXX.I | 282  | 18.48946    | 16.62539  |
|                  | Darmor_AUP_IAOSW_1_1_COUW4A   | 1704 | 26.70795    | 26.09219  |
|                  | Darmor_AUP_KAOSW_2_1_COUW4A   | 2201 | 34.99242    | 34.69817  |
|                  | Darmor_AUP_LAOSW_3_1_COUW4A   | 525  | 8.006359    | 7.978017  |
|                  | Darmor_AUP_MAOSW_4_1_COUW4A   | 560  | 8.406944    | 8.067442  |
|                  | Darmor_AUP_NAOSW_5_1_COUW4A   | 516  | 7.666226    | 7.277939  |
|                  | Darmor_AUP_PAOSW_6_1_COUW4A   | 2119 | 32.61775    | 32.4285   |
|                  | Ningyou_ERR037335             | 0    | 4.01E-27    | 0         |
|                  | TN04_ERR037297                | 0    | 2.02E-18    | 0         |
|                  | TN05_ERR037298                | 0    | 7.39E-26    | 0         |
|                  | TN08_ERR037301                | 0    | 8.43E-29    | 0         |
|                  | TN103_ERR037317               | 0    | 2.05E-23    | 0         |
|                  | TN108_ERR037318               | 0    | 4.33E-26    | 0         |
|                  | TN109_ERR037319               | 0    | 4.79E-26    | 0         |
|                  | TN10_ERR037294                | 1    | 0.3218429   | 0.3052417 |
|                  | TN121_ERR037320               | 0    | 1.05E-28    | 0         |

|                  |                               |     |           |            |
|------------------|-------------------------------|-----|-----------|------------|
|                  | TN124_ERR037321               | 0   | 2.28E-29  | 0          |
|                  | TN126_ERR037322               | 0   | 5.17E-29  | 0          |
|                  | TN128_ERR037323               | 0   | 9.22E-19  | 0          |
|                  | TN129_ERR037324               | 0   | 3.00E-29  | 0          |
|                  | TN12_ERR037302                | 0   | 2.19E-27  | 0          |
|                  | TN138_ERR037325               | 0   | 1.87E-24  | 0          |
|                  | TN149_ERR037326               | 0   | 3.25E-28  | 0          |
|                  | TN161_ERR037327               | 0   | 5.23E-28  | 0          |
|                  | TN163_ERR037328               | 0   | 1.52E-28  | 0          |
|                  | TN170_ERR037329               | 0   | 3.68E-28  | 0          |
|                  | TN171_ERR037332               | 0   | 8.63E-19  | 0          |
|                  | TN172_ERR037333               | 0   | 6.88E-29  | 0          |
|                  | TN176_ERR037330               | 0   | 2.56E-29  | 0          |
|                  | TN177_ERR037331               | 0   | 1.86E-22  | 0          |
|                  | TN24_ERR037299                | 0   | 4.70E-26  | 0          |
|                  | TN28_ERR037295                | 0   | 1.71E-17  | 0          |
|                  | TN30_ERR037305                | 0   | 2.27E-28  | 0          |
|                  | TN31_ERR037303                | 0   | 1.46E-28  | 0          |
|                  | TN38_ERR037304                | 0   | 1.49E-28  | 0          |
|                  | TN44_ERR037306                | 0   | 2.33E-19  | 0          |
|                  | TN48_ERR037307                | 0   | 5.56E-28  | 0          |
|                  | TN51_ERR037308                | 0   | 2.62E-21  | 0          |
|                  | TN57_ERR037309                | 0   | 2.94E-29  | 0          |
|                  | TN72_ERR037312                | 0   | 2.68E-28  | 0          |
|                  | TN76_ERR037311                | 0   | 3.44E-29  | 0          |
|                  | TN77_ERR037310                | 1   | 0.0481669 | 0.04816006 |
|                  | TN85_ERR037315                | 0   | 1.07E-22  | 0          |
|                  | TN88_ERR037313                | 0   | 4.85E-24  | 0          |
|                  | TN90_ERR037316                | 0   | 2.08E-27  | 0          |
|                  | Tapidor_ERR037334             | 0   | 6.86E-18  | 0          |
| BnaU01g02910.1D2 | Darmor_AUP_AOSW_2_D09BTACXX.I | 129 | 2.648612  | 2.111126   |
|                  | Darmor_AUP_BOSW_3_D09BTACXX.I | 102 | 2.920173  | 2.497056   |
|                  | Darmor_AUP_DOSW_2_D09BTACXX.I | 57  | 0.8911423 | 0.7487545  |

|  |                               |     |            |            |
|--|-------------------------------|-----|------------|------------|
|  | Darmor_AUP_FOSW_4_D09BTACXX.I | 148 | 2.629316   | 2.187566   |
|  | Darmor_AUP_HOSW_5_D09BTACXX.I | 65  | 1.311521   | 0.9998195  |
|  | Darmor_AUP_IAOSW_1_1_C0UW4A   | 426 | 2.786886   | 2.570694   |
|  | Darmor_AUP_KAOSW_2_1_C0UW4A   | 329 | 2.230232   | 2.193839   |
|  | Darmor_AUP_LAOSW_3_1_C0UW4A   | 188 | 1.295834   | 1.155047   |
|  | Darmor_AUP_MAOSW_4_1_C0UW4A   | 285 | 1.933336   | 1.856321   |
|  | Darmor_AUP_NAOSW_5_1_C0UW4A   | 125 | 0.8442447  | 0.8344967  |
|  | Darmor_AUP_PAOSW_6_1_C0UW4A   | 359 | 2.510041   | 2.487225   |
|  | Ningyou_ERR037335             | 8   | 0.4367525  | 0.02603342 |
|  | TN04_ERR037297                | 5   | 0.111757   | 0.07584102 |
|  | TN05_ERR037298                | 15  | 0.3488656  | 0.06888059 |
|  | TN08_ERR037301                | 22  | 0.5142411  | 0.5133893  |
|  | TN103_ERR037317               | 8   | 0.2290059  | 0.2114753  |
|  | TN108_ERR037318               | 7   | 0.2229485  | 0.04665362 |
|  | TN109_ERR037319               | 12  | 0.2815234  | 0.2815234  |
|  | TN10_ERR037294                | 8   | 0.2655015  | 0.259222   |
|  | TN121_ERR037320               | 9   | 0.2496627  | 0.2496599  |
|  | TN124_ERR037321               | 5   | 0.2899767  | 0.00196351 |
|  | TN126_ERR037322               | 3   | 0.07563627 | 0.07563626 |
|  | TN128_ERR037323               | 0   | 3.62E-31   | 0          |
|  | TN129_ERR037324               | 19  | 0.4811413  | 0.4803872  |
|  | TN12_ERR037302                | 8   | 0.2676084  | 0.2673929  |
|  | TN138_ERR037325               | 5   | 0.1752341  | 0.03805422 |
|  | TN149_ERR037326               | 3   | 0.1731312  | 0.1731312  |
|  | TN161_ERR037327               | 2   | 0.05518912 | 0.05413949 |
|  | TN163_ERR037328               | 3   | 0.09273186 | 0          |
|  | TN170_ERR037329               | 13  | 0.3144709  | 0.1749035  |
|  | TN171_ERR037332               | 0   | 1.30E-29   | 0          |
|  | TN172_ERR037333               | 14  | 0.3147303  | 0.3033109  |
|  | TN176_ERR037330               | 15  | 0.362101   | 0.1947422  |
|  | TN177_ERR037331               | 7   | 0.1479307  | 0.04355149 |
|  | TN24_ERR037299                | 0   | 4.94E-08   | 0          |
|  | TN28_ERR037295                | 18  | 0.3976036  | 0.3955039  |

|                  |                               |      |            |            |
|------------------|-------------------------------|------|------------|------------|
|                  | TN30_ERR037305                | 6    | 0.1271274  | 0.04041649 |
|                  | TN31_ERR037303                | 22   | 0.5701708  | 0.5686103  |
|                  | TN38_ERR037304                | 11   | 0.2443323  | 0.0594753  |
|                  | TN44_ERR037306                | 3    | 0.1095679  | 0.1089963  |
|                  | TN48_ERR037307                | 4    | 0.1850465  | 0.1850465  |
|                  | TN51_ERR037308                | 4    | 0.1066263  | 0.1065834  |
|                  | TN57_ERR037309                | 4    | 0.08059197 | 0.03878011 |
|                  | TN72_ERR037312                | 6    | 0.14494    | 0.1449093  |
|                  | TN76_ERR037311                | 4    | 0.08646909 | 0.08130576 |
|                  | TN77_ERR037310                | 0    | 4.68E-13   | 0          |
|                  | TN85_ERR037315                | 3    | 0.0707646  | 0.06790331 |
|                  | TN88_ERR037313                | 1    | 0.04268454 | 0          |
|                  | TN90_ERR037316                | 4    | 0.1753386  | 0.1752929  |
|                  | Tapidor_ERR037334             | 1    | 0.02219195 | 0.02219195 |
| BnaC01g20210.1D2 | Darmor_AUP_AOSW_2_D09BTACXX.I | 15   | 0.2250041  | 0.1369468  |
|                  | Darmor_AUP_BOSW_3_D09BTACXX.I | 27   | 0.4555211  | 0.3770889  |
|                  | Darmor_AUP_DOSW_2_D09BTACXX.I | 18   | 0.2444429  | 0.2429431  |
|                  | Darmor_AUP_FOSW_4_D09BTACXX.I | 436  | 6.227613   | 5.60556    |
|                  | Darmor_AUP_HOSW_5_D09BTACXX.I | 225  | 3.661206   | 3.385816   |
|                  | Darmor_AUP_IAOSW_1_1_COUW4A   | 48   | 0.2530513  | 0.2510614  |
|                  | Darmor_AUP_KAOSW_2_1_COUW4A   | 62   | 0.3272138  | 0.3222841  |
|                  | Darmor_AUP_LAOSW_3_1_COUW4A   | 1182 | 6.648739   | 6.457217   |
|                  | Darmor_AUP_MAOSW_4_1_COUW4A   | 1115 | 6.366319   | 6.184684   |
|                  | Darmor_AUP_NAOSW_5_1_COUW4A   | 1145 | 6.49648    | 6.355046   |
|                  | Darmor_AUP_PAOSW_6_1_COUW4A   | 40   | 0.2176432  | 0.2171239  |
|                  | Ningyou_ERR037335             | 228  | 5.403686   | 4.851384   |
|                  | TN04_ERR037297                | 254  | 4.540869   | 4.104896   |
|                  | TN05_ERR037298                | 330  | 6.561361   | 5.94908    |
|                  | TN08_ERR037301                | 221  | 6.135084   | 5.364078   |
|                  | TN103_ERR037317               | 163  | 4.89296    | 4.207774   |
|                  | TN108_ERR037318               | 251  | 7.005306   | 6.338233   |
|                  | TN109_ERR037319               | 0    | 3.55E-23   | 0          |
|                  | TN10_ERR037294                | 327  | 6.89542    | 6.023824   |

|                  |                               |     |            |            |
|------------------|-------------------------------|-----|------------|------------|
|                  | TN121_ERR037320               | 0   | 2.02E-24   | 0          |
|                  | TN124_ERR037321               | 0   | 6.54E-27   | 0          |
|                  | TN126_ERR037322               | 0   | 9.25E-25   | 0          |
|                  | TN128_ERR037323               | 317 | 6.101769   | 5.471313   |
|                  | TN129_ERR037324               | 331 | 6.121021   | 5.419633   |
|                  | TN12_ERR037302                | 0   | 1.01E-26   | 0          |
|                  | TN138_ERR037325               | 0   | 3.44E-25   | 0          |
|                  | TN149_ERR037326               | 0   | 4.89E-24   | 0          |
|                  | TN161_ERR037327               | 184 | 3.995544   | 3.595157   |
|                  | TN163_ERR037328               | 340 | 7.724613   | 6.735977   |
|                  | TN170_ERR037329               | 2   | 0.03070924 | 0.02224305 |
|                  | TN171_ERR037332               | 197 | 4.39069    | 3.641121   |
|                  | TN172_ERR037333               | 0   | 2.99E-27   | 0          |
|                  | TN176_ERR037330               | 433 | 7.343542   | 6.449951   |
|                  | TN177_ERR037331               | 2   | 0.03259273 | 0.03034251 |
|                  | TN24_ERR037299                | 0   | 2.33E-25   | 0          |
|                  | TN28_ERR037295                | 335 | 6.956862   | 6.463077   |
|                  | TN30_ERR037305                | 259 | 5.448304   | 4.934539   |
|                  | TN31_ERR037303                | 356 | 7.786603   | 7.011466   |
|                  | TN38_ERR037304                | 1   | 0.04932599 | 0          |
|                  | TN44_ERR037306                | 159 | 5.503551   | 4.510673   |
|                  | TN48_ERR037307                | 0   | 9.40E-26   | 0          |
|                  | TN51_ERR037308                | 0   | 2.01E-25   | 0          |
|                  | TN57_ERR037309                | 343 | 6.096976   | 5.357071   |
|                  | TN72_ERR037312                | 220 | 5.965939   | 5.187254   |
|                  | TN76_ERR037311                | 257 | 6.199952   | 5.079072   |
|                  | TN77_ERR037310                | 126 | 3.182838   | 2.660021   |
|                  | TN85_ERR037315                | 340 | 7.629168   | 6.720445   |
|                  | TN88_ERR037313                | 217 | 4.384685   | 3.742172   |
|                  | TN90_ERR037316                | 333 | 8.823907   | 7.800239   |
|                  | Tapidor_ERR037334             | 0   | 1.95E-23   | 0          |
| BnaU01g04540.1D2 | Darmor_AUP_AOSW_2_D09BTACXX.I | 17  | 1.235115   | 1.235115   |
|                  | Darmor_AUP_BOSW_3_D09BTACXX.I | 8   | 0.7872366  | 0.7872366  |



|  |                               |    |            |            |
|--|-------------------------------|----|------------|------------|
|  | Darmor_AUP_DOSW_2_D09BTACXX.I | 15 | 1.029523   | 1.0263     |
|  | Darmor_AUP_FOSW_4_D09BTACXX.I | 4  | 0.3422307  | 0.3421916  |
|  | Darmor_AUP_HOSW_5_D09BTACXX.I | 1  | 0.09876414 | 0.09876414 |
|  | Darmor_AUP_IAOSW_1_1_COUW4A   | 9  | 0.2951762  | 0.2951762  |
|  | Darmor_AUP_KAOSW_2_1_COUW4A   | 10 | 0.3295639  | 0.3295639  |
|  | Darmor_AUP_LAOSW_3_1_COUW4A   | 7  | 0.2273112  | 0.2273112  |
|  | Darmor_AUP_MAOSW_4_1_COUW4A   | 3  | 0.09757736 | 0.09757736 |
|  | Darmor_AUP_NAOSW_5_1_COUW4A   | 7  | 0.2323525  | 0.2323525  |
|  | Darmor_AUP_PAOSW_6_1_COUW4A   | 6  | 0.1977747  | 0.1977747  |
|  | Ningyou_ERR037335             | 1  | 0.1227338  | 0.1211307  |
|  | TN04_ERR037297                | 0  | 0          | 0          |
|  | TN05_ERR037298                | 0  | 5.07E-54   | 0          |
|  | TN08_ERR037301                | 0  | 8.10E-38   | 0          |
|  | TN103_ERR037317               | 0  | 0          | 0          |
|  | TN108_ERR037318               | 0  | 0          | 0          |
|  | TN109_ERR037319               | 0  | 0          | 0          |
|  | TN10_ERR037294                | 0  | 4.16E-47   | 0          |
|  | TN121_ERR037320               | 0  | 1.28E-37   | 0          |
|  | TN124_ERR037321               | 0  | 0          | 0          |
|  | TN126_ERR037322               | 0  | 3.53E-35   | 0          |
|  | TN128_ERR037323               | 0  | 2.90E-36   | 0          |
|  | TN129_ERR037324               | 0  | 2.22E-29   | 0          |
|  | TN12_ERR037302                | 0  | 0          | 0          |
|  | TN138_ERR037325               | 0  | 0          | 0          |
|  | TN149_ERR037326               | 0  | 9.28E-43   | 0          |
|  | TN161_ERR037327               | 0  | 0          | 0          |
|  | TN163_ERR037328               | 0  | 0          | 0          |
|  | TN170_ERR037329               | 0  | 3.57E-28   | 0          |
|  | TN171_ERR037332               | 0  | 4.48E-61   | 0          |
|  | TN172_ERR037333               | 0  | 5.38E-26   | 0          |
|  | TN176_ERR037330               | 0  | 3.72E-08   | 3.72E-08   |
|  | TN177_ERR037331               | 0  | 5.59E-38   | 0          |
|  | TN24_ERR037299                | 0  | 4.08E-37   | 0          |

|                  |                               |     |            |            |
|------------------|-------------------------------|-----|------------|------------|
|                  | TN28_ERR037295                | 0   | 2.97E-40   | 0          |
|                  | TN30_ERR037305                | 0   | 3.95E-104  | 0          |
|                  | TN31_ERR037303                | 0   | 2.92E-38   | 0          |
|                  | TN38_ERR037304                | 0   | 1.54E-37   | 0          |
|                  | TN44_ERR037306                | 0   | 8.97E-89   | 0          |
|                  | TN48_ERR037307                | 0   | 2.45E-76   | 0          |
|                  | TN51_ERR037308                | 0   | 1.89E-95   | 0          |
|                  | TN57_ERR037309                | 0   | 0          | 0          |
|                  | TN72_ERR037312                | 0   | 0          | 0          |
|                  | TN76_ERR037311                | 0   | 0          | 0          |
|                  | TN77_ERR037310                | 0   | 0          | 0          |
|                  | TN85_ERR037315                | 0   | 0          | 0          |
|                  | TN88_ERR037313                | 0   | 7.61E-25   | 0          |
|                  | TN90_ERR037316                | 0   | 7.18E-35   | 0          |
|                  | Tapidor_ERR037334             | 0   | 1.05E-38   | 0          |
| BnaC02g06840.1D2 | Darmor_AUP_AOSW_2_D09BTACXX.I | 276 | 8.126687   | 7.260045   |
|                  | Darmor_AUP_BOSW_3_D09BTACXX.I | 152 | 6.165458   | 5.200896   |
|                  | Darmor_AUP_DOSW_2_D09BTACXX.I | 301 | 6.903671   | 5.939593   |
|                  | Darmor_AUP_FOSW_4_D09BTACXX.I | 148 | 4.156555   | 3.369988   |
|                  | Darmor_AUP_HOSW_5_D09BTACXX.I | 207 | 7.480783   | 6.583302   |
|                  | Darmor_AUP_IAOSW_1_1_C0UW4A   | 881 | 9.246281   | 8.7794     |
|                  | Darmor_AUP_KAOSW_2_1_C0UW4A   | 844 | 8.897485   | 8.537705   |
|                  | Darmor_AUP_LAOSW_3_1_C0UW4A   | 275 | 2.764425   | 2.741172   |
|                  | Darmor_AUP_MAOSW_4_1_C0UW4A   | 330 | 3.22195    | 3.106399   |
|                  | Darmor_AUP_NAOSW_5_1_C0UW4A   | 217 | 2.124938   | 1.996868   |
|                  | Darmor_AUP_PAOSW_6_1_C0UW4A   | 902 | 10.39726   | 9.99293    |
|                  | Ningyou_ERR037335             | 8   | 0.2837306  | 0          |
|                  | TN04_ERR037297                | 0   | 1.49E-17   | 0          |
|                  | TN05_ERR037298                | 3   | 0.09663195 | 0.08615074 |
|                  | TN08_ERR037301                | 1   | 0.03276517 | 0.01621012 |
|                  | TN103_ERR037317               | 3   | 0.1264259  | 0.09857012 |
|                  | TN108_ERR037318               | 0   | 4.62E-16   | 0          |
|                  | TN109_ERR037319               | 5   | 0.3432492  | 0.131208   |

|                  |                               |   |            |            |
|------------------|-------------------------------|---|------------|------------|
|                  | TN10_ERR037294                | 1 | 0.0287973  | 0          |
|                  | TN121_ERR037320               | 0 | 2.40E-19   | 0          |
|                  | TN124_ERR037321               | 1 | 0.06757777 | 0          |
|                  | TN126_ERR037322               | 2 | 0.05640097 | 0.04707046 |
|                  | TN128_ERR037323               | 1 | 0.09993491 | 0          |
|                  | TN129_ERR037324               | 3 | 0.08563074 | 0.06390204 |
|                  | TN12_ERR037302                | 0 | 4.38E-17   | 0          |
|                  | TN138_ERR037325               | 0 | 5.27E-20   | 0          |
|                  | TN149_ERR037326               | 0 | 2.68E-16   | 0          |
|                  | TN161_ERR037327               | 0 | 3.82E-23   | 0          |
|                  | TN163_ERR037328               | 0 | 5.63E-18   | 0          |
|                  | TN170_ERR037329               | 0 | 2.96E-23   | 0          |
|                  | TN171_ERR037332               | 1 | 0.02966624 | 0.01152549 |
|                  | TN172_ERR037333               | 3 | 0.1435296  | 0          |
|                  | TN176_ERR037330               | 0 | 8.57E-20   | 0          |
|                  | TN177_ERR037331               | 5 | 0.1507838  | 0.01267928 |
|                  | TN24_ERR037299                | 3 | 0.3061198  | 0.08895055 |
|                  | TN28_ERR037295                | 1 | 0.0282114  | 0.0135192  |
|                  | TN30_ERR037305                | 3 | 0.0930485  | 0.08292202 |
|                  | TN31_ERR037303                | 3 | 0.09759287 | 0.05435875 |
|                  | TN38_ERR037304                | 2 | 0.3553359  | 0.2505288  |
|                  | TN44_ERR037306                | 3 | 0.1339485  | 0          |
|                  | TN48_ERR037307                | 1 | 0.03341419 | 0.0291646  |
|                  | TN51_ERR037308                | 2 | 0.07723735 | 0.05819874 |
|                  | TN57_ERR037309                | 0 | 4.15E-24   | 0          |
|                  | TN72_ERR037312                | 2 | 0.07151741 | 0.06481924 |
|                  | TN76_ERR037311                | 3 | 0.09592705 | 0          |
|                  | TN77_ERR037310                | 0 | 8.27E-23   | 0          |
|                  | TN85_ERR037315                | 0 | 1.39E-23   | 0          |
|                  | TN88_ERR037313                | 0 | 1.04E-17   | 0          |
|                  | TN90_ERR037316                | 1 | 0.03224901 | 0          |
|                  | Tapidor_ERR037334             | 1 | 0.3151808  | 0          |
| BnaA03g42810.1D2 | Darmor_AUP_AOSW_2_D09BTACXX.I | 0 | 0          | 0          |

|                               |   |            |            |
|-------------------------------|---|------------|------------|
| Darmor_AUP_BOSW_3_D09BTACXX.I | 0 | 0          | 0          |
| Darmor_AUP_DOSW_2_D09BTACXX.I | 0 | 0          | 0          |
| Darmor_AUP_FOSW_4_D09BTACXX.I | 0 | 0          | 0          |
| Darmor_AUP_HOSW_5_D09BTACXX.I | 0 | 0          | 0          |
| Darmor_AUP_IAOSW_1_1_C0UW4A   | 0 | 0          | 0          |
| Darmor_AUP_KAOSW_2_1_C0UW4A   | 0 | 0          | 0          |
| Darmor_AUP_LAOSW_3_1_C0UW4A   | 0 | 0          | 0          |
| Darmor_AUP_MAOSW_4_1_C0UW4A   | 0 | 0          | 0          |
| Darmor_AUP_NAOSW_5_1_C0UW4A   | 0 | 0          | 0          |
| Darmor_AUP_PAOSW_6_1_C0UW4A   | 1 | 0.09500131 | 0.09500131 |
| Ningyou_ERR037335             | 0 | 0          | 0          |
| TN04_ERR037297                | 0 | 0          | 0          |
| TN05_ERR037298                | 0 | 0          | 0          |
| TN08_ERR037301                | 0 | 0          | 0          |
| TN103_ERR037317               | 0 | 0          | 0          |
| TN108_ERR037318               | 0 | 0          | 0          |
| TN109_ERR037319               | 0 | 0          | 0          |
| TN10_ERR037294                | 0 | 0          | 0          |
| TN121_ERR037320               | 0 | 0          | 0          |
| TN124_ERR037321               | 0 | 0          | 0          |
| TN126_ERR037322               | 0 | 0          | 0          |
| TN128_ERR037323               | 0 | 0          | 0          |
| TN129_ERR037324               | 0 | 0          | 0          |
| TN12_ERR037302                | 0 | 0          | 0          |
| TN138_ERR037325               | 0 | 0          | 0          |
| TN149_ERR037326               | 0 | 0          | 0          |
| TN161_ERR037327               | 0 | 0          | 0          |
| TN163_ERR037328               | 0 | 0          | 0          |
| TN170_ERR037329               | 0 | 0          | 0          |
| TN171_ERR037332               | 0 | 0          | 0          |
| TN172_ERR037333               | 0 | 0          | 0          |
| TN176_ERR037330               | 0 | 0          | 0          |
| TN177_ERR037331               | 0 | 0          | 0          |

|                  |                               |   |          |   |
|------------------|-------------------------------|---|----------|---|
|                  | TN24_ERR037299                | 0 | 0        | 0 |
|                  | TN28_ERR037295                | 0 | 0        | 0 |
|                  | TN30_ERR037305                | 0 | 0        | 0 |
|                  | TN31_ERR037303                | 0 | 0        | 0 |
|                  | TN38_ERR037304                | 0 | 0        | 0 |
|                  | TN44_ERR037306                | 0 | 0        | 0 |
|                  | TN48_ERR037307                | 0 | 0        | 0 |
|                  | TN51_ERR037308                | 0 | 0        | 0 |
|                  | TN57_ERR037309                | 0 | 0        | 0 |
|                  | TN72_ERR037312                | 0 | 0        | 0 |
|                  | TN76_ERR037311                | 0 | 0        | 0 |
|                  | TN77_ERR037310                | 0 | 0        | 0 |
|                  | TN85_ERR037315                | 0 | 0        | 0 |
|                  | TN88_ERR037313                | 0 | 0        | 0 |
|                  | TN90_ERR037316                | 0 | 0        | 0 |
|                  | Tapidor_ERR037334             | 0 | 0        | 0 |
| BnaC05g10000.1D2 | Darmor_AUP_AOSW_2_D09BTACXX.I | 0 | 0        | 0 |
|                  | Darmor_AUP_BOSW_3_D09BTACXX.I | 0 | 0        | 0 |
|                  | Darmor_AUP_DOSW_2_D09BTACXX.I | 0 | 0        | 0 |
|                  | Darmor_AUP_FOSW_4_D09BTACXX.I | 0 | 0        | 0 |
|                  | Darmor_AUP_HOSW_5_D09BTACXX.I | 0 | 0        | 0 |
|                  | Darmor_AUP_IAOSW_1_1_C0UW4A   | 0 | 0        | 0 |
|                  | Darmor_AUP_KAOSW_2_1_C0UW4A   | 0 | 0        | 0 |
|                  | Darmor_AUP_LAOSW_3_1_C0UW4A   | 0 | 0        | 0 |
|                  | Darmor_AUP_MAOSW_4_1_C0UW4A   | 0 | 0        | 0 |
|                  | Darmor_AUP_NAOSW_5_1_C0UW4A   | 0 | 0        | 0 |
|                  | Darmor_AUP_PAOSW_6_1_C0UW4A   | 0 | 0        | 0 |
|                  | Ningyou_ERR037335             | 0 | 4.75E-40 | 0 |
|                  | TN04_ERR037297                | 0 | 0        | 0 |
|                  | TN05_ERR037298                | 0 | 0        | 0 |
|                  | TN08_ERR037301                | 0 | 0        | 0 |
|                  | TN103_ERR037317               | 0 | 0        | 0 |
|                  | TN108_ERR037318               | 0 | 0        | 0 |

|  |                   |   |   |   |
|--|-------------------|---|---|---|
|  | TN109_ERR037319   | 0 | 0 | 0 |
|  | TN10_ERR037294    | 0 | 0 | 0 |
|  | TN121_ERR037320   | 0 | 0 | 0 |
|  | TN124_ERR037321   | 0 | 0 | 0 |
|  | TN126_ERR037322   | 0 | 0 | 0 |
|  | TN128_ERR037323   | 0 | 0 | 0 |
|  | TN129_ERR037324   | 0 | 0 | 0 |
|  | TN12_ERR037302    | 0 | 0 | 0 |
|  | TN138_ERR037325   | 0 | 0 | 0 |
|  | TN149_ERR037326   | 0 | 0 | 0 |
|  | TN161_ERR037327   | 0 | 0 | 0 |
|  | TN163_ERR037328   | 0 | 0 | 0 |
|  | TN170_ERR037329   | 0 | 0 | 0 |
|  | TN171_ERR037332   | 0 | 0 | 0 |
|  | TN172_ERR037333   | 0 | 0 | 0 |
|  | TN176_ERR037330   | 0 | 0 | 0 |
|  | TN177_ERR037331   | 0 | 0 | 0 |
|  | TN24_ERR037299    | 0 | 0 | 0 |
|  | TN28_ERR037295    | 0 | 0 | 0 |
|  | TN30_ERR037305    | 0 | 0 | 0 |
|  | TN31_ERR037303    | 0 | 0 | 0 |
|  | TN38_ERR037304    | 0 | 0 | 0 |
|  | TN44_ERR037306    | 0 | 0 | 0 |
|  | TN48_ERR037307    | 0 | 0 | 0 |
|  | TN51_ERR037308    | 0 | 0 | 0 |
|  | TN57_ERR037309    | 0 | 0 | 0 |
|  | TN72_ERR037312    | 0 | 0 | 0 |
|  | TN76_ERR037311    | 0 | 0 | 0 |
|  | TN77_ERR037310    | 0 | 0 | 0 |
|  | TN85_ERR037315    | 0 | 0 | 0 |
|  | TN88_ERR037313    | 0 | 0 | 0 |
|  | TN90_ERR037316    | 0 | 0 | 0 |
|  | Tapidor_ERR037334 | 0 | 0 | 0 |

|                  |                               |     |          |          |
|------------------|-------------------------------|-----|----------|----------|
| BnaC03g12730.1D2 | Darmor_AUP_AOSW_2_D09BTACXX.I | 80  | 27.68174 | 27.68174 |
|                  | Darmor_AUP_BOSW_3_D09BTACXX.I | 82  | 38.36585 | 38.36585 |
|                  | Darmor_AUP_DOSW_2_D09BTACXX.I | 116 | 36.95063 | 0        |
|                  | Darmor_AUP_FOSW_4_D09BTACXX.I | 59  | 24.08864 | 24.08864 |
|                  | Darmor_AUP_HOSW_5_D09BTACXX.I | 45  | 20.73745 | 20.73745 |
|                  | Darmor_AUP_IAOSW_1_1_COUW4A   | 172 | 22.6368  | 22.6368  |
|                  | Darmor_AUP_KAOSW_2_1_COUW4A   | 111 | 14.91014 | 14.91014 |
|                  | Darmor_AUP_LAOSW_3_1_COUW4A   | 69  | 9.887364 | 9.887364 |
|                  | Darmor_AUP_MAOSW_4_1_COUW4A   | 81  | 11.69283 | 11.69283 |
|                  | Darmor_AUP_NAOSW_5_1_COUW4A   | 82  | 11.98611 | 11.98611 |
|                  | Darmor_AUP_PAOSW_6_1_COUW4A   | 117 | 16.39936 | 16.39936 |
|                  | Ningyou_ERR037335             | 22  | 15.10124 | 15.08074 |
|                  | TN04_ERR037297                | 13  | 7.274361 | 7.274361 |
|                  | TN05_ERR037298                | 0   | 0        | 0        |
|                  | TN08_ERR037301                | 0   | 0        | 0        |
|                  | TN103_ERR037317               | 28  | 19.65389 | 17.35098 |
|                  | TN108_ERR037318               | 0   | 0        | 0        |
|                  | TN109_ERR037319               | 0   | 0        | 0        |
|                  | TN10_ERR037294                | 0   | 0        | 0        |
|                  | TN121_ERR037320               | 0   | 0        | 0        |
|                  | TN124_ERR037321               | 32  | 16.34381 | 15.15343 |
|                  | TN126_ERR037322               | 23  | 11.17062 | 11.04965 |
|                  | TN128_ERR037323               | 17  | 10.42592 | 9.776068 |
|                  | TN129_ERR037324               | 0   | 0        | 0        |
|                  | TN12_ERR037302                | 0   | 0        | 0        |
|                  | TN138_ERR037325               | 0   | 0        | 0        |
|                  | TN149_ERR037326               | 0   | 0        | 0        |
|                  | TN161_ERR037327               | 14  | 9.61158  | 9.61158  |
|                  | TN163_ERR037328               | 15  | 8.768442 | 8.768442 |
|                  | TN170_ERR037329               | 0   | 0        | 0        |
|                  | TN171_ERR037332               | 0   | 0        | 0        |
|                  | TN172_ERR037333               | 0   | 0        | 0        |
|                  | TN176_ERR037330               | 27  | 15.62398 | 12.03961 |

|                  |                               |     |            |            |
|------------------|-------------------------------|-----|------------|------------|
|                  | TN177_ERR037331               | 21  | 12.51947   | 3.765088   |
|                  | TN24_ERR037299                | 0   | 0          | 0          |
|                  | TN28_ERR037295                | 0   | 0          | 0          |
|                  | TN30_ERR037305                | 0   | 0          | 0          |
|                  | TN31_ERR037303                | 0   | 0          | 0          |
|                  | TN38_ERR037304                | 0   | 1.36E-35   | 0          |
|                  | TN44_ERR037306                | 0   | 0          | 0          |
|                  | TN48_ERR037307                | 0   | 0          | 0          |
|                  | TN51_ERR037308                | 14  | 9.739478   | 8.050255   |
|                  | TN57_ERR037309                | 24  | 11.59059   | 11.59059   |
|                  | TN72_ERR037312                | 0   | 0          | 0          |
|                  | TN76_ERR037311                | 0   | 0          | 0          |
|                  | TN77_ERR037310                | 1   | 0.5588834  | 0.5588834  |
|                  | TN85_ERR037315                | 16  | 10.24044   | 10.20701   |
|                  | TN88_ERR037313                | 0   | 0          | 0          |
|                  | TN90_ERR037316                | 0   | 0          | 0          |
|                  | Tapidor_ERR037334             | 0   | 0          | 0          |
| BnaC06g20070.1D2 | Darmor_AUP_AOSW_2_D09BTACXX.I | 50  | 1.788112   | 1.788112   |
|                  | Darmor_AUP_BOSW_3_D09BTACXX.I | 98  | 4.67085    | 4.67085    |
|                  | Darmor_AUP_DOSW_2_D09BTACXX.I | 1   | 0.03273471 | 0.03273471 |
|                  | Darmor_AUP_FOSW_4_D09BTACXX.I | 6   | 0.2494773  | 0.2494773  |
|                  | Darmor_AUP_HOSW_5_D09BTACXX.I | 5   | 0.2431672  | 0.2431672  |
|                  | Darmor_AUP_IAOSW_1_1_C0UW4A   | 128 | 1.754557   | 1.754557   |
|                  | Darmor_AUP_KAOSW_2_1_C0UW4A   | 88  | 1.235919   | 1.235919   |
|                  | Darmor_AUP_LAOSW_3_1_C0UW4A   | 3   | 0.04440506 | 0.04440506 |
|                  | Darmor_AUP_MAOSW_4_1_C0UW4A   | 4   | 0.05931307 | 0.05931307 |
|                  | Darmor_AUP_NAOSW_5_1_C0UW4A   | 0   | 0          | 0          |
|                  | Darmor_AUP_PAOSW_6_1_C0UW4A   | 77  | 1.144247   | 1.144247   |
|                  | Ningyou_ERR037335             | 0   | 0          | 0          |
|                  | TN04_ERR037297                | 0   | 0          | 0          |
|                  | TN05_ERR037298                | 0   | 0          | 0          |
|                  | TN08_ERR037301                | 2   | 0.1034497  | 0.1034497  |
|                  | TN103_ERR037317               | 1   | 0.07084282 | 0.07084282 |



|  |                 |   |            |            |
|--|-----------------|---|------------|------------|
|  | TN108_ERR037318 | 0 | 0          | 0          |
|  | TN109_ERR037319 | 0 | 0          | 0          |
|  | TN10_ERR037294  | 2 | 0.08949739 | 0.08949739 |
|  | TN121_ERR037320 | 0 | 0          | 0          |
|  | TN124_ERR037321 | 1 | 0.04851165 | 0.04851165 |
|  | TN126_ERR037322 | 1 | 0.04972901 | 0.04972901 |
|  | TN128_ERR037323 | 0 | 0          | 0          |
|  | TN129_ERR037324 | 1 | 0.0489866  | 0.0489866  |
|  | TN12_ERR037302  | 0 | 0          | 0          |
|  | TN138_ERR037325 | 1 | 0.06604351 | 0.06604351 |
|  | TN149_ERR037326 | 1 | 0.07066862 | 0.07066862 |
|  | TN161_ERR037327 | 0 | 0          | 0          |
|  | TN163_ERR037328 | 2 | 0.1176629  | 0.1176629  |
|  | TN170_ERR037329 | 0 | 0          | 0          |
|  | TN171_ERR037332 | 1 | 0.04548245 | 0.04548245 |
|  | TN172_ERR037333 | 0 | 0          | 0          |
|  | TN176_ERR037330 | 0 | 0          | 0          |
|  | TN177_ERR037331 | 0 | 0          | 0          |
|  | TN24_ERR037299  | 2 | 0.1328223  | 0.1328223  |
|  | TN28_ERR037295  | 0 | 0          | 0          |
|  | TN30_ERR037305  | 0 | 0          | 0          |
|  | TN31_ERR037303  | 0 | 0          | 0          |
|  | TN38_ERR037304  | 0 | 0          | 0          |
|  | TN44_ERR037306  | 1 | 0.07023049 | 0.07023049 |
|  | TN48_ERR037307  | 0 | 0          | 0          |
|  | TN51_ERR037308  | 0 | 0          | 0          |
|  | TN57_ERR037309  | 0 | 0          | 0          |
|  | TN72_ERR037312  | 0 | 0          | 0          |
|  | TN76_ERR037311  | 0 | 0          | 0          |
|  | TN77_ERR037310  | 0 | 0          | 0          |
|  | TN85_ERR037315  | 1 | 0.05930163 | 0.05930163 |
|  | TN88_ERR037313  | 0 | 0          | 0          |
|  | TN90_ERR037316  | 1 | 0.05277146 | 0.05277146 |

|                  |                               |      |            |            |
|------------------|-------------------------------|------|------------|------------|
|                  | Tapidor_ERR037334             | 0    | 0          | 0          |
| BnaC03g02810.1D2 | Darmor_AUP_AOSW_2_D09BTACXX.I | 147  | 5.772974   | 5.772974   |
|                  | Darmor_AUP_BOSW_3_D09BTACXX.I | 272  | 14.18994   | 14.1899    |
|                  | Darmor_AUP_DOSW_2_D09BTACXX.I | 9    | 0.3132219  | 0.3132219  |
|                  | Darmor_AUP_FOSW_4_D09BTACXX.I | 2    | 0.08823061 | 0.08823061 |
|                  | Darmor_AUP_HOSW_5_D09BTACXX.I | 46   | 2.461899   | 2.461899   |
|                  | Darmor_AUP_IAOSW_1_1_C0UW4A   | 1121 | 17.20211   | 17.20211   |
|                  | Darmor_AUP_KAOSW_2_1_C0UW4A   | 398  | 6.188707   | 6.188707   |
|                  | Darmor_AUP_LAOSW_3_1_C0UW4A   | 3    | 0.0490202  | 0.0490202  |
|                  | Darmor_AUP_MAOSW_4_1_C0UW4A   | 1    | 0.01640374 | 0.01640374 |
|                  | Darmor_AUP_NAOSW_5_1_C0UW4A   | 2    | 0.03261088 | 0.03261088 |
|                  | Darmor_AUP_PAOSW_6_1_C0UW4A   | 940  | 15.385     | 15.385     |
|                  | Ningyou_ERR037335             | 1    | 0.06557848 | 0.06557204 |
|                  | TN04_ERR037297                | 0    | 5.26E-45   | 0          |
|                  | TN05_ERR037298                | 0    | 0          | 0          |
|                  | TN08_ERR037301                | 0    | 0          | 0          |
|                  | TN103_ERR037317               | 0    | 6.57E-30   | 0          |
|                  | TN108_ERR037318               | 0    | 9.80E-31   | 0          |
|                  | TN109_ERR037319               | 0    | 0          | 0          |
|                  | TN10_ERR037294                | 0    | 2.14E-35   | 0          |
|                  | TN121_ERR037320               | 0    | 6.23E-42   | 0          |
|                  | TN124_ERR037321               | 0    | 9.92E-63   | 0          |
|                  | TN126_ERR037322               | 0    | 1.13E-29   | 0          |
|                  | TN128_ERR037323               | 0    | 2.98E-32   | 0          |
|                  | TN129_ERR037324               | 0    | 7.20E-32   | 0          |
|                  | TN12_ERR037302                | 0    | 2.34E-29   | 0          |
|                  | TN138_ERR037325               | 0    | 1.17E-28   | 0          |
|                  | TN149_ERR037326               | 0    | 0          | 0          |
|                  | TN161_ERR037327               | 0    | 0          | 0          |
|                  | TN163_ERR037328               | 4    | 0.2582177  | 0.2582177  |
|                  | TN170_ERR037329               | 0    | 3.19E-32   | 0          |
|                  | TN171_ERR037332               | 0    | 4.94E-28   | 0          |
|                  | TN172_ERR037333               | 0    | 6.88E-66   | 0          |

|                  |                               |   |            |            |
|------------------|-------------------------------|---|------------|------------|
|                  | TN176_ERR037330               | 0 | 3.22E-32   | 0          |
|                  | TN177_ERR037331               | 0 | 2.63E-43   | 0          |
|                  | TN24_ERR037299                | 0 | 1.20E-26   | 0          |
|                  | TN28_ERR037295                | 0 | 2.19E-35   | 0          |
|                  | TN30_ERR037305                | 0 | 2.24E-06   | 0          |
|                  | TN31_ERR037303                | 0 | 1.14E-12   | 0          |
|                  | TN38_ERR037304                | 0 | 0          | 0          |
|                  | TN44_ERR037306                | 0 | 8.45E-41   | 0          |
|                  | TN48_ERR037307                | 0 | 0          | 0          |
|                  | TN51_ERR037308                | 1 | 0.06747015 | 0.06747015 |
|                  | TN57_ERR037309                | 1 | 0.05318477 | 0.05317836 |
|                  | TN72_ERR037312                | 0 | 0          | 0          |
|                  | TN76_ERR037311                | 0 | 2.52E-31   | 0          |
|                  | TN77_ERR037310                | 3 | 0.1672957  | 0.1672877  |
|                  | TN85_ERR037315                | 0 | 5.95E-31   | 0          |
|                  | TN88_ERR037313                | 0 | 1.67E-26   | 0          |
|                  | TN90_ERR037316                | 0 | 9.07E-54   | 0          |
|                  | Tapidor_ERR037334             | 0 | 3.32E-35   | 0          |
| BnaC04g25350.1D2 | Darmor_AUP_AOSW_2_D09BTACXX.I | 0 | 0          | 0          |
|                  | Darmor_AUP_BOSW_3_D09BTACXX.I | 0 | 0          | 0          |
|                  | Darmor_AUP_DOSW_2_D09BTACXX.I | 0 | 0          | 0          |
|                  | Darmor_AUP_FOSW_4_D09BTACXX.I | 0 | 0          | 0          |
|                  | Darmor_AUP_HOSW_5_D09BTACXX.I | 0 | 0          | 0          |
|                  | Darmor_AUP_IAOSW_1_1_C0UW4A   | 0 | 0          | 0          |
|                  | Darmor_AUP_KAOSW_2_1_C0UW4A   | 0 | 0          | 0          |
|                  | Darmor_AUP_LAOSW_3_1_C0UW4A   | 0 | 0          | 0          |
|                  | Darmor_AUP_MAOSW_4_1_C0UW4A   | 0 | 0          | 0          |
|                  | Darmor_AUP_NAOSW_5_1_C0UW4A   | 0 | 0          | 0          |
|                  | Darmor_AUP_PAOSW_6_1_C0UW4A   | 0 | 0          | 0          |
|                  | Ningyou_ERR037335             | 0 | 0          | 0          |
|                  | TN04_ERR037297                | 0 | 0          | 0          |
|                  | TN05_ERR037298                | 0 | 0          | 0          |
|                  | TN08_ERR037301                | 0 | 0          | 0          |

|  |                 |   |   |   |
|--|-----------------|---|---|---|
|  | TN103_ERR037317 | 0 | 0 | 0 |
|  | TN108_ERR037318 | 0 | 0 | 0 |
|  | TN109_ERR037319 | 0 | 0 | 0 |
|  | TN10_ERR037294  | 0 | 0 | 0 |
|  | TN121_ERR037320 | 0 | 0 | 0 |
|  | TN124_ERR037321 | 0 | 0 | 0 |
|  | TN126_ERR037322 | 0 | 0 | 0 |
|  | TN128_ERR037323 | 0 | 0 | 0 |
|  | TN129_ERR037324 | 0 | 0 | 0 |
|  | TN12_ERR037302  | 0 | 0 | 0 |
|  | TN138_ERR037325 | 0 | 0 | 0 |
|  | TN149_ERR037326 | 0 | 0 | 0 |
|  | TN161_ERR037327 | 0 | 0 | 0 |
|  | TN163_ERR037328 | 0 | 0 | 0 |
|  | TN170_ERR037329 | 0 | 0 | 0 |
|  | TN171_ERR037332 | 0 | 0 | 0 |
|  | TN172_ERR037333 | 0 | 0 | 0 |
|  | TN176_ERR037330 | 0 | 0 | 0 |
|  | TN177_ERR037331 | 0 | 0 | 0 |
|  | TN24_ERR037299  | 0 | 0 | 0 |
|  | TN28_ERR037295  | 0 | 0 | 0 |
|  | TN30_ERR037305  | 0 | 0 | 0 |
|  | TN31_ERR037303  | 0 | 0 | 0 |
|  | TN38_ERR037304  | 0 | 0 | 0 |
|  | TN44_ERR037306  | 0 | 0 | 0 |
|  | TN48_ERR037307  | 0 | 0 | 0 |
|  | TN51_ERR037308  | 0 | 0 | 0 |
|  | TN57_ERR037309  | 0 | 0 | 0 |
|  | TN72_ERR037312  | 0 | 0 | 0 |
|  | TN76_ERR037311  | 0 | 0 | 0 |
|  | TN77_ERR037310  | 0 | 0 | 0 |
|  | TN85_ERR037315  | 0 | 0 | 0 |
|  | TN88_ERR037313  | 0 | 0 | 0 |

|                  |                               |    |            |            |
|------------------|-------------------------------|----|------------|------------|
|                  | TN90_ERR037316                | 0  | 0          | 0          |
|                  | Tapidor_ERR037334             | 0  | 0          | 0          |
| BnaC01g07850.1D2 | Darmor_AUP_AOSW_2_D09BTACXX.I | 0  | 0          | 0          |
|                  | Darmor_AUP_BOSW_3_D09BTACXX.I | 0  | 0          | 0          |
|                  | Darmor_AUP_DOSW_2_D09BTACXX.I | 0  | 0          | 0          |
|                  | Darmor_AUP_FOSW_4_D09BTACXX.I | 0  | 0          | 0          |
|                  | Darmor_AUP_HOSW_5_D09BTACXX.I | 13 | 0.6777737  | 0.6777737  |
|                  | Darmor_AUP_IAOSW_1_1_COUW4A   | 0  | 0          | 0          |
|                  | Darmor_AUP_KAOSW_2_1_COUW4A   | 0  | 0          | 0          |
|                  | Darmor_AUP_LAOSW_3_1_COUW4A   | 0  | 0          | 0          |
|                  | Darmor_AUP_MAOSW_4_1_COUW4A   | 0  | 0          | 0          |
|                  | Darmor_AUP_NAOSW_5_1_COUW4A   | 0  | 0          | 0          |
|                  | Darmor_AUP_PAOSW_6_1_COUW4A   | 0  | 0          | 0          |
|                  | Ningyou_ERR037335             | 0  | 0          | 0          |
|                  | TN04_ERR037297                | 0  | 0          | 0          |
|                  | TN05_ERR037298                | 0  | 0          | 0          |
|                  | TN08_ERR037301                | 0  | 0          | 0          |
|                  | TN103_ERR037317               | 0  | 0          | 0          |
|                  | TN108_ERR037318               | 1  | 0.07039784 | 0.07039784 |
|                  | TN109_ERR037319               | 0  | 0          | 0          |
|                  | TN10_ERR037294                | 0  | 0          | 0          |
|                  | TN121_ERR037320               | 0  | 0          | 0          |
|                  | TN124_ERR037321               | 0  | 0          | 0          |
|                  | TN126_ERR037322               | 0  | 0          | 0          |
|                  | TN128_ERR037323               | 0  | 0          | 0          |
|                  | TN129_ERR037324               | 0  | 0          | 0          |
|                  | TN12_ERR037302                | 0  | 0          | 0          |
|                  | TN138_ERR037325               | 0  | 0          | 0          |
|                  | TN149_ERR037326               | 0  | 0          | 0          |
|                  | TN161_ERR037327               | 0  | 0          | 0          |
|                  | TN163_ERR037328               | 0  | 0          | 0          |
|                  | TN170_ERR037329               | 0  | 0          | 0          |
|                  | TN171_ERR037332               | 0  | 0          | 0          |

|                  |                               |    |            |            |
|------------------|-------------------------------|----|------------|------------|
|                  | TN172_ERR037333               | 0  | 0          | 0          |
|                  | TN176_ERR037330               | 0  | 0          | 0          |
|                  | TN177_ERR037331               | 0  | 0          | 0          |
|                  | TN24_ERR037299                | 0  | 0          | 0          |
|                  | TN28_ERR037295                | 0  | 0          | 0          |
|                  | TN30_ERR037305                | 0  | 0          | 0          |
|                  | TN31_ERR037303                | 0  | 0          | 0          |
|                  | TN38_ERR037304                | 0  | 0          | 0          |
|                  | TN44_ERR037306                | 0  | 0          | 0          |
|                  | TN48_ERR037307                | 0  | 0          | 0          |
|                  | TN51_ERR037308                | 0  | 0          | 0          |
|                  | TN57_ERR037309                | 0  | 0          | 0          |
|                  | TN72_ERR037312                | 0  | 0          | 0          |
|                  | TN76_ERR037311                | 0  | 0          | 0          |
|                  | TN77_ERR037310                | 0  | 0          | 0          |
|                  | TN85_ERR037315                | 0  | 0          | 0          |
|                  | TN88_ERR037313                | 0  | 0          | 0          |
|                  | TN90_ERR037316                | 0  | 0          | 0          |
|                  | Tapidor_ERR037334             | 0  | 0          | 0          |
| BnaA09g47180.1D2 | Darmor_AUP_AOSW_2_D09BTACXX.I | 3  | 0.1011155  | 0.1011155  |
|                  | Darmor_AUP_BOSW_3_D09BTACXX.I | 0  | 1.67E-23   | 0          |
|                  | Darmor_AUP_DOSW_2_D09BTACXX.I | 0  | 3.23E-32   | 0          |
|                  | Darmor_AUP_FOSW_4_D09BTACXX.I | 10 | 0.3685965  | 0.367477   |
|                  | Darmor_AUP_HOSW_5_D09BTACXX.I | 26 | 1.983066   | 1.177698   |
|                  | Darmor_AUP_IAOSW_1_1_C0UW4A   | 9  | 0.1249431  | 0.1085491  |
|                  | Darmor_AUP_KAOSW_2_1_C0UW4A   | 1  | 0.02788435 | 0.02788435 |
|                  | Darmor_AUP_LAOSW_3_1_C0UW4A   | 15 | 0.2291779  | 0.2240149  |
|                  | Darmor_AUP_MAOSW_4_1_C0UW4A   | 8  | 0.1112147  | 0.1111799  |
|                  | Darmor_AUP_NAOSW_5_1_C0UW4A   | 24 | 0.3354243  | 0.295622   |
|                  | Darmor_AUP_PAOSW_6_1_C0UW4A   | 7  | 0.09976651 | 0.09976651 |
|                  | Ningyou_ERR037335             | 9  | 0.5308244  | 0.3943103  |
|                  | TN04_ERR037297                | 0  | 5.19E-24   | 0          |
|                  | TN05_ERR037298                | 0  | 1.21E-29   | 0          |

|  |                 |    |            |            |
|--|-----------------|----|------------|------------|
|  | TN08_ERR037301  | 0  | 0          | 0          |
|  | TN103_ERR037317 | 6  | 0.7287038  | 0.6978266  |
|  | TN108_ERR037318 | 0  | 1.17E-24   | 0          |
|  | TN109_ERR037319 | 6  | 0.3307485  | 0.3307295  |
|  | TN10_ERR037294  | 0  | 3.60E-24   | 0          |
|  | TN121_ERR037320 | 4  | 0.2647848  | 0.2647846  |
|  | TN124_ERR037321 | 0  | 1.13E-35   | 0          |
|  | TN126_ERR037322 | 12 | 0.9169544  | 0.8191904  |
|  | TN128_ERR037323 | 10 | 0.8111516  | 0.8088771  |
|  | TN129_ERR037324 | 4  | 0.3665519  | 0.3158848  |
|  | TN12_ERR037302  | 7  | 0.3348823  | 0.3348823  |
|  | TN138_ERR037325 | 1  | 0.3137462  | 0.3136807  |
|  | TN149_ERR037326 | 0  | 2.10E-28   | 0          |
|  | TN161_ERR037327 | 9  | 0.8965968  | 0          |
|  | TN163_ERR037328 | 19 | 1.457373   | 1.275775   |
|  | TN170_ERR037329 | 0  | 4.93E-12   | 0          |
|  | TN171_ERR037332 | 0  | 0          | 0          |
|  | TN172_ERR037333 | 0  | 2.43E-25   | 0          |
|  | TN176_ERR037330 | 2  | 0.08546523 | 0.08546523 |
|  | TN177_ERR037331 | 0  | 3.84E-29   | 0          |
|  | TN24_ERR037299  | 0  | 6.69E-19   | 0          |
|  | TN28_ERR037295  | 5  | 0.3599846  | 0.3599845  |
|  | TN30_ERR037305  | 0  | 1.26E-22   | 0          |
|  | TN31_ERR037303  | 0  | 1.95E-26   | 0          |
|  | TN38_ERR037304  | 0  | 0          | 0          |
|  | TN44_ERR037306  | 0  | 1.05E-06   | 0          |
|  | TN48_ERR037307  | 7  | 0.3578088  | 0.1473578  |
|  | TN51_ERR037308  | 13 | 1.015857   | 0.8934591  |
|  | TN57_ERR037309  | 20 | 1.052525   | 0.1856929  |
|  | TN72_ERR037312  | 9  | 1.070697   | 0.9979253  |
|  | TN76_ERR037311  | 3  | 0.3038208  | 0.3038018  |
|  | TN77_ERR037310  | 0  | 1.45E-05   | 1.43E-05   |
|  | TN85_ERR037315  | 10 | 1.160184   | 1.152741   |

|                  |                               |     |            |            |
|------------------|-------------------------------|-----|------------|------------|
|                  | TN88_ERR037313                | 0   | 7.20E-23   | 0          |
|                  | TN90_ERR037316                | 8   | 0.6557161  | 0.2066004  |
|                  | Tapidor_ERR037334             | 0   | 3.63E-29   | 0          |
| BnaC02g06050.1D2 | Darmor_AUP_AOSW_2_D09BTACXX.I | 9   | 0.5286093  | 0          |
|                  | Darmor_AUP_BOSW_3_D09BTACXX.I | 5   | 0.3829976  | 0.369711   |
|                  | Darmor_AUP_DOSW_2_D09BTACXX.I | 53  | 5.900912   | 4.066256   |
|                  | Darmor_AUP_FOSW_4_D09BTACXX.I | 16  | 6.271788   | 3.1655     |
|                  | Darmor_AUP_HOSW_5_D09BTACXX.I | 92  | 18.6113    | 12.97481   |
|                  | Darmor_AUP_IAOSW_1_1_C0UW4A   | 10  | 0.4814103  | 0.4810262  |
|                  | Darmor_AUP_KAOSW_2_1_C0UW4A   | 32  | 1.381361   | 0.976919   |
|                  | Darmor_AUP_LAOSW_3_1_C0UW4A   | 151 | 3.081857   | 2.683834   |
|                  | Darmor_AUP_MAOSW_4_1_C0UW4A   | 147 | 3.759365   | 2.952749   |
|                  | Darmor_AUP_NAOSW_5_1_C0UW4A   | 73  | 1.633236   | 1.483566   |
|                  | Darmor_AUP_PAOSW_6_1_C0UW4A   | 17  | 0.3050093  | 0.2543395  |
|                  | Ningyou_ERR037335             | 0   | 1.14E-09   | 0          |
|                  | TN04_ERR037297                | 0   | 2.69E-09   | 0          |
|                  | TN05_ERR037298                | 0   | 1.21E-08   | 0          |
|                  | TN08_ERR037301                | 0   | 2.32E-09   | 0          |
|                  | TN103_ERR037317               | 0   | 0.08103396 | 0.08103396 |
|                  | TN108_ERR037318               | 0   | 0          | 0          |
|                  | TN109_ERR037319               | 0   | 0          | 0          |
|                  | TN10_ERR037294                | 0   | 0.05015654 | 0.0501562  |
|                  | TN121_ERR037320               | 0   | 2.35E-12   | 0          |
|                  | TN124_ERR037321               | 0   | 5.18E-09   | 0          |
|                  | TN126_ERR037322               | 0   | 6.02E-27   | 0          |
|                  | TN128_ERR037323               | 0   | 2.52E-06   | 0          |
|                  | TN129_ERR037324               | 0   | 4.59E-29   | 0          |
|                  | TN12_ERR037302                | 0   | 4.17E-09   | 0          |
|                  | TN138_ERR037325               | 0   | 2.67E-31   | 0          |
|                  | TN149_ERR037326               | 0   | 1.89E-16   | 0          |
|                  | TN161_ERR037327               | 0   | 8.44E-11   | 0          |
|                  | TN163_ERR037328               | 0   | 0          | 0          |
|                  | TN170_ERR037329               | 0   | 8.69E-33   | 0          |



|                  |                               |      |             |              |
|------------------|-------------------------------|------|-------------|--------------|
|                  | TN171_ERR037332               | 0    | 0.04174659  | 0.03817887   |
|                  | TN172_ERR037333               | 0    | 3.60E-08    | 0            |
|                  | TN176_ERR037330               | 0    | 2.88E-27    | 0            |
|                  | TN177_ERR037331               | 0    | 4.68E-12    | 0            |
|                  | TN24_ERR037299                | 0    | 1.17E-17    | 0            |
|                  | TN28_ERR037295                | 0    | 3.08E-29    | 0            |
|                  | TN30_ERR037305                | 1    | 0.0775402   | 0.05462455   |
|                  | TN31_ERR037303                | 0    | 3.80E-22    | 0            |
|                  | TN38_ERR037304                | 0    | 0.008428885 | 0            |
|                  | TN44_ERR037306                | 0    | 0.2358055   | 0.2358055    |
|                  | TN48_ERR037307                | 0    | 7.76E-13    | 0            |
|                  | TN51_ERR037308                | 0    | 0           | 0            |
|                  | TN57_ERR037309                | 0    | 2.04E-28    | 0            |
|                  | TN72_ERR037312                | 0    | 4.99E-18    | 0            |
|                  | TN76_ERR037311                | 0    | 0.000185347 | 0.0001831165 |
|                  | TN77_ERR037310                | 0    | 2.74E-14    | 0            |
|                  | TN85_ERR037315                | 0    | 3.18E-25    | 0            |
|                  | TN88_ERR037313                | 0    | 5.54E-12    | 0            |
|                  | TN90_ERR037316                | 0    | 3.52E-07    | 0            |
|                  | Tapidor_ERR037334             | 0    | 0.02762287  | 0.02511343   |
| BnaC09g10800.1D2 | Darmor_AUP_AOSW_2_D09BTACXX.I | 373  | 39.80954    | 34.29618     |
|                  | Darmor_AUP_BOSW_3_D09BTACXX.I | 276  | 39.69768    | 33.49211     |
|                  | Darmor_AUP_DOSW_2_D09BTACXX.I | 647  | 62.76665    | 56.06304     |
|                  | Darmor_AUP_FOSW_4_D09BTACXX.I | 345  | 42.96125    | 37.04527     |
|                  | Darmor_AUP_HOSW_5_D09BTACXX.I | 239  | 33.28575    | 27.43133     |
|                  | Darmor_AUP_IAOSW_1_1_COUW4A   | 1288 | 41.8941     | 39.23428     |
|                  | Darmor_AUP_KAOSW_2_1_COUW4A   | 1364 | 44.45589    | 41.3923      |
|                  | Darmor_AUP_LAOSW_3_1_COUW4A   | 1384 | 45.6642     | 42.27843     |
|                  | Darmor_AUP_MAOSW_4_1_COUW4A   | 1485 | 49.03291    | 45.77701     |
|                  | Darmor_AUP_NAOSW_5_1_COUW4A   | 1399 | 44.06983    | 41.14981     |
|                  | Darmor_AUP_PAOSW_6_1_COUW4A   | 1431 | 49.77893    | 46.18059     |
|                  | Ningyou_ERR037335             | 59   | 24.90686    | 18.46106     |
|                  | TN04_ERR037297                | 0    | 1.44E-10    | 0            |

|  |                 |     |           |           |
|--|-----------------|-----|-----------|-----------|
|  | TN05_ERR037298  | 0   | 4.47E-10  | 0         |
|  | TN08_ERR037301  | 0   | 8.43E-09  | 0         |
|  | TN103_ERR037317 | 70  | 26.98391  | 25.89149  |
|  | TN108_ERR037318 | 80  | 24.44135  | 22.17776  |
|  | TN109_ERR037319 | 75  | 24.07092  | 18.20331  |
|  | TN10_ERR037294  | 0   | 1.01E-09  | 0         |
|  | TN121_ERR037320 | 83  | 23.29914  | 23.29914  |
|  | TN124_ERR037321 | 0   | 4.16E-18  | 0         |
|  | TN126_ERR037322 | 0   | 1.22E-18  | 0         |
|  | TN128_ERR037323 | 94  | 26.12694  | 26.12662  |
|  | TN129_ERR037324 | 0   | 2.04E-15  | 0         |
|  | TN12_ERR037302  | 0   | 1.28E-08  | 0         |
|  | TN138_ERR037325 | 72  | 23.84992  | 23.61118  |
|  | TN149_ERR037326 | 0   | 1.20E-06  | 0         |
|  | TN161_ERR037327 | 0   | 8.09E-27  | 0         |
|  | TN163_ERR037328 | 0   | 1.95E-13  | 0         |
|  | TN170_ERR037329 | 89  | 25.28504  | 25.28478  |
|  | TN171_ERR037332 | 0   | 9.15E-27  | 0         |
|  | TN172_ERR037333 | 0   | 5.87E-11  | 0         |
|  | TN176_ERR037330 | 0   | 3.88E-07  | 0         |
|  | TN177_ERR037331 | 104 | 22.01969  | 22.01967  |
|  | TN24_ERR037299  | 64  | 21.16683  | 21.10572  |
|  | TN28_ERR037295  | 110 | 27.17997  | 26.90687  |
|  | TN30_ERR037305  | 102 | 27.25249  | 20.57212  |
|  | TN31_ERR037303  | 0   | 3.07E-10  | 0         |
|  | TN38_ERR037304  | 2   | 0.6537127 | 0.2696128 |
|  | TN44_ERR037306  | 80  | 22.98374  | 19.28119  |
|  | TN48_ERR037307  | 101 | 23.46156  | 17.62508  |
|  | TN51_ERR037308  | 92  | 22.94108  | 18.04281  |
|  | TN57_ERR037309  | 117 | 27.77792  | 27.74619  |
|  | TN72_ERR037312  | 77  | 24.63552  | 24.53183  |
|  | TN76_ERR037311  | 115 | 29.59008  | 22.49515  |
|  | TN77_ERR037310  | 112 | 27.02519  | 25.61427  |

|                  |                               |     |            |             |
|------------------|-------------------------------|-----|------------|-------------|
|                  | TN85_ERR037315                | 91  | 25.37788   | 25.37751    |
|                  | TN88_ERR037313                | 100 | 26.28983   | 22.02699    |
|                  | TN90_ERR037316                | 1   | 0.2565246  | 0           |
|                  | Tapidor_ERR037334             | 0   | 2.93E-13   | 0           |
| BnaC03g33340.1D2 | Darmor_AUP_AOSW_2_D09BTACXX.I | 194 | 0.05804004 | 0.04682001  |
|                  | Darmor_AUP_BOSW_3_D09BTACXX.I | 235 | 0.1074157  | 0.08608987  |
|                  | Darmor_AUP_DOSW_2_D09BTACXX.I | 235 | 0.0790101  | 0.06770442  |
|                  | Darmor_AUP_FOSW_4_D09BTACXX.I | 64  | 0.0225171  | 0.01345029  |
|                  | Darmor_AUP_HOSW_5_D09BTACXX.I | 265 | 0.1028279  | 0.08761186  |
|                  | Darmor_AUP_IAOSW_1_1_COUW4A   | 680 | 0.1325794  | 0.1288198   |
|                  | Darmor_AUP_KAOSW_2_1_COUW4A   | 508 | 0.1029324  | 0.09599207  |
|                  | Darmor_AUP_LAOSW_3_1_COUW4A   | 222 | 0.04277595 | 0.04234677  |
|                  | Darmor_AUP_MAOSW_4_1_COUW4A   | 206 | 0.03897268 | 0.0367014   |
|                  | Darmor_AUP_NAOSW_5_1_COUW4A   | 256 | 0.05008951 | 0.0456241   |
|                  | Darmor_AUP_PAOSW_6_1_COUW4A   | 640 | 0.1254564  | 0.1227954   |
|                  | Ningyou_ERR037335             | 13  | 0.01469271 | 0.001896067 |
|                  | TN04_ERR037297                | 13  | 0.0204273  | 0.01279458  |
|                  | TN05_ERR037298                | 32  | 0.0308669  | 0.02078806  |
|                  | TN08_ERR037301                | 30  | 0.02210064 | 0.01403415  |
|                  | TN103_ERR037317               | 32  | 0.03204494 | 0.01598566  |
|                  | TN108_ERR037318               | 18  | 0.01373999 | 0.007327073 |
|                  | TN109_ERR037319               | 43  | 0.02615219 | 0.0222974   |
|                  | TN10_ERR037294                | 26  | 0.02150821 | 0.005228236 |
|                  | TN121_ERR037320               | 43  | 0.02556723 | 0.01501537  |
|                  | TN124_ERR037321               | 31  | 0.03107457 | 0.01513304  |
|                  | TN126_ERR037322               | 39  | 0.02061338 | 0.01393896  |
|                  | TN128_ERR037323               | 23  | 0.02285334 | 0.006710188 |
|                  | TN129_ERR037324               | 48  | 0.02296885 | 0.01855979  |
|                  | TN12_ERR037302                | 50  | 0.05856927 | 0.04374173  |
|                  | TN138_ERR037325               | 41  | 0.04779941 | 0.0431515   |
|                  | TN149_ERR037326               | 27  | 0.0270643  | 0.02143813  |
|                  | TN161_ERR037327               | 34  | 0.03042246 | 0.0184204   |
|                  | TN163_ERR037328               | 27  | 0.02550583 | 0.007398542 |

|                  |                               |    |            |             |
|------------------|-------------------------------|----|------------|-------------|
|                  | TN170_ERR037329               | 24 | 0.02658504 | 0.01384787  |
|                  | TN171_ERR037332               | 25 | 0.01367617 | 0.00855703  |
|                  | TN172_ERR037333               | 26 | 0.01352469 | 0.0110158   |
|                  | TN176_ERR037330               | 46 | 0.04555307 | 0.03627248  |
|                  | TN177_ERR037331               | 33 | 0.02552744 | 0.01600851  |
|                  | TN24_ERR037299                | 22 | 0.01977323 | 0.00770046  |
|                  | TN28_ERR037295                | 24 | 0.02269514 | 0.01455479  |
|                  | TN30_ERR037305                | 45 | 0.02888644 | 0.01616611  |
|                  | TN31_ERR037303                | 30 | 0.01962582 | 0.01199492  |
|                  | TN38_ERR037304                | 32 | 0.03074774 | 0.018793    |
|                  | TN44_ERR037306                | 25 | 0.02820312 | 0.01653149  |
|                  | TN48_ERR037307                | 33 | 0.03835998 | 0.02033025  |
|                  | TN51_ERR037308                | 13 | 0.01069046 | 0.002499771 |
|                  | TN57_ERR037309                | 34 | 0.03662698 | 0.02582534  |
|                  | TN72_ERR037312                | 30 | 0.0202571  | 0.01571573  |
|                  | TN76_ERR037311                | 35 | 0.04918475 | 0.03624936  |
|                  | TN77_ERR037310                | 18 | 0.02031436 | 0.006334208 |
|                  | TN85_ERR037315                | 28 | 0.01951379 | 0.009987362 |
|                  | TN88_ERR037313                | 38 | 0.02370056 | 0.01416884  |
|                  | TN90_ERR037316                | 27 | 0.01865285 | 0.007692881 |
|                  | Tapidor_ERR037334             | 21 | 0.02169435 | 0.01423283  |
| BnaC04g14480.1D2 | Darmor_AUP_AOSW_2_D09BTACXX.I | 5  | 0.2571946  | 0.2499668   |
|                  | Darmor_AUP_BOSW_3_D09BTACXX.I | 7  | 0.308562   | 0.2270413   |
|                  | Darmor_AUP_DOSW_2_D09BTACXX.I | 22 | 1.535696   | 0.967652    |
|                  | Darmor_AUP_FOSW_4_D09BTACXX.I | 38 | 3.101234   | 1.851394    |
|                  | Darmor_AUP_HOSW_5_D09BTACXX.I | 76 | 3.630793   | 2.822493    |
|                  | Darmor_AUP_IAOSW_1_1_C0UW4A   | 6  | 0.09024911 | 0.08690048  |
|                  | Darmor_AUP_KAOSW_2_1_C0UW4A   | 4  | 0.05984663 | 0.05974248  |
|                  | Darmor_AUP_LAOSW_3_1_C0UW4A   | 47 | 0.6979295  | 0.6364213   |
|                  | Darmor_AUP_MAOSW_4_1_C0UW4A   | 52 | 0.7621571  | 0.7289217   |
|                  | Darmor_AUP_NAOSW_5_1_C0UW4A   | 51 | 0.7556292  | 0.4929869   |
|                  | Darmor_AUP_PAOSW_6_1_C0UW4A   | 5  | 0.08905013 | 0.08843     |
|                  | Ningyou_ERR037335             | 0  | 2.43E-12   | 0           |

|  |                 |   |            |            |
|--|-----------------|---|------------|------------|
|  | TN04_ERR037297  | 0 | 2.54E-23   | 0          |
|  | TN05_ERR037298  | 0 | 4.78E-24   | 0          |
|  | TN08_ERR037301  | 0 | 1.31E-26   | 0          |
|  | TN103_ERR037317 | 0 | 2.00E-20   | 0          |
|  | TN108_ERR037318 | 0 | 1.93E-23   | 0          |
|  | TN109_ERR037319 | 0 | 4.74E-26   | 0          |
|  | TN10_ERR037294  | 0 | 2.99E-25   | 0          |
|  | TN121_ERR037320 | 0 | 2.17E-25   | 0          |
|  | TN124_ERR037321 | 0 | 2.17E-20   | 0          |
|  | TN126_ERR037322 | 1 | 0.04554564 | 0.04545993 |
|  | TN128_ERR037323 | 0 | 1.36E-21   | 0          |
|  | TN129_ERR037324 | 0 | 2.32E-17   | 0          |
|  | TN12_ERR037302  | 0 | 1.15E-24   | 0          |
|  | TN138_ERR037325 | 0 | 2.00E-23   | 0          |
|  | TN149_ERR037326 | 0 | 1.05E-21   | 0          |
|  | TN161_ERR037327 | 0 | 5.20E-25   | 0          |
|  | TN163_ERR037328 | 0 | 4.79E-25   | 0          |
|  | TN170_ERR037329 | 0 | 1.09E-25   | 0          |
|  | TN171_ERR037332 | 0 | 7.28E-26   | 0          |
|  | TN172_ERR037333 | 0 | 2.60E-20   | 0          |
|  | TN176_ERR037330 | 0 | 6.72E-24   | 0          |
|  | TN177_ERR037331 | 0 | 8.41E-23   | 0          |
|  | TN24_ERR037299  | 0 | 1.08E-23   | 0          |
|  | TN28_ERR037295  | 0 | 1.24E-20   | 0          |
|  | TN30_ERR037305  | 0 | 3.39E-23   | 0          |
|  | TN31_ERR037303  | 0 | 4.44E-25   | 0          |
|  | TN38_ERR037304  | 0 | 6.74E-26   | 0          |
|  | TN44_ERR037306  | 0 | 3.64E-24   | 0          |
|  | TN48_ERR037307  | 0 | 2.51E-25   | 0          |
|  | TN51_ERR037308  | 0 | 1.98E-21   | 0          |
|  | TN57_ERR037309  | 0 | 6.70E-21   | 0          |
|  | TN72_ERR037312  | 0 | 8.73E-24   | 0          |
|  | TN76_ERR037311  | 0 | 1.97E-22   | 0          |

|                  |                               |      |          |          |
|------------------|-------------------------------|------|----------|----------|
|                  | TN77_ERR037310                | 0    | 3.87E-24 | 0        |
|                  | TN85_ERR037315                | 0    | 1.58E-24 | 0        |
|                  | TN88_ERR037313                | 0    | 1.28E-16 | 0        |
|                  | TN90_ERR037316                | 0    | 1.58E-24 | 0        |
|                  | Tapidor_ERR037334             | 0    | 4.06E-19 | 0        |
| BnaC02g08000.1D2 | Darmor_AUP_AOSW_2_D09BTACXX.I | 249  | 6.537989 | 5.844607 |
|                  | Darmor_AUP_BOSW_3_D09BTACXX.I | 362  | 9.42626  | 8.506588 |
|                  | Darmor_AUP_DOSW_2_D09BTACXX.I | 674  | 13.43929 | 12.5323  |
|                  | Darmor_AUP_FOSW_4_D09BTACXX.I | 1411 | 40.97367 | 39.45954 |
|                  | Darmor_AUP_HOSW_5_D09BTACXX.I | 461  | 13.8649  | 12.68963 |
|                  | Darmor_AUP_IAOSW_1_1_C0UW4A   | 797  | 7.546845 | 7.436459 |
|                  | Darmor_AUP_KAOSW_2_1_C0UW4A   | 819  | 7.440279 | 7.193321 |
|                  | Darmor_AUP_LAOSW_3_1_C0UW4A   | 4552 | 41.39    | 40.71676 |
|                  | Darmor_AUP_MAOSW_4_1_C0UW4A   | 4852 | 42.59436 | 42.01363 |
|                  | Darmor_AUP_NAOSW_5_1_C0UW4A   | 4151 | 36.91706 | 36.45848 |
|                  | Darmor_AUP_PAOSW_6_1_C0UW4A   | 865  | 8.02104  | 7.694958 |
|                  | Ningyou_ERR037335             | 67   | 3.141641 | 2.826339 |
|                  | TN04_ERR037297                | 72   | 2.083286 | 1.630669 |
|                  | TN05_ERR037298                | 96   | 2.843315 | 2.635375 |
|                  | TN08_ERR037301                | 54   | 1.649679 | 1.300302 |
|                  | TN103_ERR037317               | 78   | 2.911947 | 2.291459 |
|                  | TN108_ERR037318               | 71   | 2.751777 | 1.994908 |
|                  | TN109_ERR037319               | 53   | 1.634287 | 1.029777 |
|                  | TN10_ERR037294                | 85   | 2.574366 | 1.923957 |
|                  | TN121_ERR037320               | 66   | 1.929897 | 1.520202 |
|                  | TN124_ERR037321               | 66   | 1.901429 | 1.670582 |
|                  | TN126_ERR037322               | 74   | 1.894387 | 1.378915 |
|                  | TN128_ERR037323               | 67   | 1.811636 | 1.566698 |
|                  | TN129_ERR037324               | 55   | 1.532092 | 1.243049 |
|                  | TN12_ERR037302                | 60   | 1.852053 | 1.511299 |
|                  | TN138_ERR037325               | 92   | 3.824997 | 3.329741 |
|                  | TN149_ERR037326               | 118  | 4.058574 | 3.247028 |
|                  | TN161_ERR037327               | 54   | 3.174211 | 2.527814 |

|                  |                               |     |            |            |
|------------------|-------------------------------|-----|------------|------------|
|                  | TN163_ERR037328               | 102 | 3.015798   | 2.767912   |
|                  | TN170_ERR037329               | 63  | 1.717943   | 1.300485   |
|                  | TN171_ERR037332               | 51  | 1.357935   | 1.135791   |
|                  | TN172_ERR037333               | 63  | 2.385653   | 2.182012   |
|                  | TN176_ERR037330               | 56  | 1.374926   | 0.9721946  |
|                  | TN177_ERR037331               | 48  | 1.633856   | 1.432835   |
|                  | TN24_ERR037299                | 94  | 3.423182   | 3.197529   |
|                  | TN28_ERR037295                | 61  | 1.896727   | 1.566263   |
|                  | TN30_ERR037305                | 76  | 2.258782   | 1.933112   |
|                  | TN31_ERR037303                | 66  | 2.454901   | 1.870184   |
|                  | TN38_ERR037304                | 83  | 2.519871   | 2.376583   |
|                  | TN44_ERR037306                | 60  | 2.746401   | 2.478193   |
|                  | TN48_ERR037307                | 49  | 1.855774   | 1.733731   |
|                  | TN51_ERR037308                | 53  | 2.090331   | 1.788808   |
|                  | TN57_ERR037309                | 75  | 1.948491   | 1.682748   |
|                  | TN72_ERR037312                | 63  | 2.046936   | 1.720299   |
|                  | TN76_ERR037311                | 82  | 2.8194     | 2.169395   |
|                  | TN77_ERR037310                | 79  | 2.114076   | 1.880826   |
|                  | TN85_ERR037315                | 58  | 1.787836   | 1.393168   |
|                  | TN88_ERR037313                | 75  | 2.736764   | 2.249802   |
|                  | TN90_ERR037316                | 62  | 1.755621   | 1.540172   |
|                  | Tapidor_ERR037334             | 62  | 2.79378    | 1.731923   |
| BnaA01g22340.1D2 | Darmor_AUP_AOSW_2_D09BTACXX.I | 1   | 0.05871608 | 0.05871607 |
|                  | Darmor_AUP_BOSW_3_D09BTACXX.I | 2   | 0.1618442  | 0.1538344  |
|                  | Darmor_AUP_DOSW_2_D09BTACXX.I | 8   | 0.5577702  | 0.5568021  |
|                  | Darmor_AUP_FOSW_4_D09BTACXX.I | 71  | 5.675686   | 3.469503   |
|                  | Darmor_AUP_HOSW_5_D09BTACXX.I | 28  | 2.260398   | 2.253158   |
|                  | Darmor_AUP_IAOSW_1_1_C0UW4A   | 14  | 0.4128382  | 0.4120055  |
|                  | Darmor_AUP_KAOSW_2_1_C0UW4A   | 8   | 0.224701   | 0.2151452  |
|                  | Darmor_AUP_LAOSW_3_1_C0UW4A   | 171 | 4.273236   | 4.270371   |
|                  | Darmor_AUP_MAOSW_4_1_C0UW4A   | 162 | 3.752326   | 3.74929    |
|                  | Darmor_AUP_NAOSW_5_1_C0UW4A   | 232 | 5.493415   | 5.493415   |
|                  | Darmor_AUP_PAOSW_6_1_C0UW4A   | 10  | 0.2407932  | 0.2407932  |

|  |                   |    |           |           |
|--|-------------------|----|-----------|-----------|
|  | Ningyou_ERR037335 | 9  | 0.8086392 | 0.567286  |
|  | TN04_ERR037297    | 0  | 2.57E-22  | 0         |
|  | TN05_ERR037298    | 0  | 4.44E-20  | 0         |
|  | TN08_ERR037301    | 5  | 0.4333055 | 0.2077385 |
|  | TN103_ERR037317   | 6  | 0.8345375 | 0.2738877 |
|  | TN108_ERR037318   | 0  | 0         | 0         |
|  | TN109_ERR037319   | 12 | 0.9897238 | 0.24624   |
|  | TN10_ERR037294    | 5  | 0.7331901 | 0         |
|  | TN121_ERR037320   | 18 | 2.073344  | 0.2737136 |
|  | TN124_ERR037321   | 7  | 0.4879045 | 0.4619938 |
|  | TN126_ERR037322   | 7  | 0.5888597 | 0.5853092 |
|  | TN128_ERR037323   | 0  | 0.7756904 | 0.7756904 |
|  | TN129_ERR037324   | 9  | 0.6068047 | 0.6006112 |
|  | TN12_ERR037302    | 0  | 1.11E-28  | 0         |
|  | TN138_ERR037325   | 0  | 1.93E-28  | 0         |
|  | TN149_ERR037326   | 5  | 0.4138616 | 0.4054508 |
|  | TN161_ERR037327   | 0  | 7.21E-30  | 0         |
|  | TN163_ERR037328   | 0  | 5.99E-21  | 0         |
|  | TN170_ERR037329   | 11 | 0.7537834 | 0.3608189 |
|  | TN171_ERR037332   | 0  | 1.09E-26  | 0         |
|  | TN172_ERR037333   | 0  | 4.39E-31  | 0         |
|  | TN176_ERR037330   | 0  | 1.13E-18  | 0         |
|  | TN177_ERR037331   | 5  | 0.3734264 | 0.3591145 |
|  | TN24_ERR037299    | 6  | 0.5728565 | 0.5726827 |
|  | TN28_ERR037295    | 0  | 0.8243623 | 0.8243623 |
|  | TN30_ERR037305    | 15 | 1.262548  | 1.222729  |
|  | TN31_ERR037303    | 7  | 0.5621219 | 0.5221871 |
|  | TN38_ERR037304    | 13 | 1.971809  | 0.1899753 |
|  | TN44_ERR037306    | 0  | 6.34E-28  | 0         |
|  | TN48_ERR037307    | 0  | 2.60E-24  | 0         |
|  | TN51_ERR037308    | 0  | 7.73E-30  | 0         |
|  | TN57_ERR037309    | 6  | 0.4332255 | 0.0337574 |
|  | TN72_ERR037312    | 0  | 6.64E-28  | 0         |



|                  |                               |     |           |           |
|------------------|-------------------------------|-----|-----------|-----------|
|                  | TN76_ERR037311                | 10  | 1.232208  | 1.169595  |
|                  | TN77_ERR037310                | 0   | 2.56E-18  | 0         |
|                  | TN85_ERR037315                | 10  | 0.8432185 | 0.8427985 |
|                  | TN88_ERR037313                | 0   | 6.33E-27  | 0         |
|                  | TN90_ERR037316                | 0   | 4.77E-20  | 0         |
|                  | Tapidor_ERR037334             | 0   | 1.68E-16  | 0         |
| BnaC02g07860.1D2 | Darmor_AUP_AOSW_2_D09BTACXX.I | 74  | 1.554962  | 1.524636  |
|                  | Darmor_AUP_BOSW_3_D09BTACXX.I | 55  | 1.707509  | 1.634093  |
|                  | Darmor_AUP_DOSW_2_D09BTACXX.I | 97  | 2.100408  | 1.857183  |
|                  | Darmor_AUP_FOSW_4_D09BTACXX.I | 90  | 2.329984  | 2.155247  |
|                  | Darmor_AUP_HOSW_5_D09BTACXX.I | 83  | 2.406637  | 2.275906  |
|                  | Darmor_AUP_IAOSW_1_1_C0UW4A   | 125 | 1.37454   | 1.343011  |
|                  | Darmor_AUP_KAOSW_2_1_C0UW4A   | 103 | 1.132242  | 1.132242  |
|                  | Darmor_AUP_LAOSW_3_1_C0UW4A   | 116 | 1.200274  | 1.200274  |
|                  | Darmor_AUP_MAOSW_4_1_C0UW4A   | 141 | 1.468079  | 1.468079  |
|                  | Darmor_AUP_NAOSW_5_1_C0UW4A   | 86  | 0.9019415 | 0.9019415 |
|                  | Darmor_AUP_PAOSW_6_1_C0UW4A   | 123 | 1.301899  | 1.301899  |
|                  | Ningyou_ERR037335             | 0   | 3.37E-19  | 0         |
|                  | TN04_ERR037297                | 0   | 6.89E-22  | 0         |
|                  | TN05_ERR037298                | 0   | 7.54E-27  | 0         |
|                  | TN08_ERR037301                | 0   | 6.17E-29  | 0         |
|                  | TN103_ERR037317               | 0   | 1.72E-22  | 0         |
|                  | TN108_ERR037318               | 0   | 5.57E-27  | 0         |
|                  | TN109_ERR037319               | 0   | 9.21E-29  | 0         |
|                  | TN10_ERR037294                | 0   | 1.18E-20  | 0         |
|                  | TN121_ERR037320               | 0   | 4.99E-32  | 0         |
|                  | TN124_ERR037321               | 0   | 5.70E-21  | 0         |
|                  | TN126_ERR037322               | 0   | 8.26E-27  | 0         |
|                  | TN128_ERR037323               | 0   | 3.82E-27  | 0         |
|                  | TN129_ERR037324               | 0   | 1.73E-29  | 0         |
|                  | TN12_ERR037302                | 0   | 1.43E-17  | 0         |
|                  | TN138_ERR037325               | 0   | 4.49E-28  | 0         |
|                  | TN149_ERR037326               | 0   | 7.39E-25  | 0         |

|                  |                               |     |           |           |
|------------------|-------------------------------|-----|-----------|-----------|
|                  | TN161_ERR037327               | 0   | 3.67E-27  | 0         |
|                  | TN163_ERR037328               | 0   | 1.11E-25  | 0         |
|                  | TN170_ERR037329               | 0   | 1.36E-29  | 0         |
|                  | TN171_ERR037332               | 0   | 1.36E-31  | 0         |
|                  | TN172_ERR037333               | 0   | 1.07E-26  | 0         |
|                  | TN176_ERR037330               | 0   | 1.05E-30  | 0         |
|                  | TN177_ERR037331               | 0   | 8.67E-29  | 0         |
|                  | TN24_ERR037299                | 0   | 3.84E-27  | 0         |
|                  | TN28_ERR037295                | 0   | 2.26E-29  | 0         |
|                  | TN30_ERR037305                | 0   | 4.42E-33  | 0         |
|                  | TN31_ERR037303                | 0   | 5.57E-28  | 0         |
|                  | TN38_ERR037304                | 0   | 1.13E-26  | 0         |
|                  | TN44_ERR037306                | 0   | 3.66E-27  | 0         |
|                  | TN48_ERR037307                | 0   | 0         | 0         |
|                  | TN51_ERR037308                | 0   | 7.52E-26  | 0         |
|                  | TN57_ERR037309                | 0   | 2.47E-30  | 0         |
|                  | TN72_ERR037312                | 0   | 1.16E-16  | 0         |
|                  | TN76_ERR037311                | 0   | 3.94E-27  | 0         |
|                  | TN77_ERR037310                | 0   | 1.21E-25  | 0         |
|                  | TN85_ERR037315                | 0   | 2.29E-19  | 0         |
|                  | TN88_ERR037313                | 0   | 1.53E-28  | 0         |
|                  | TN90_ERR037316                | 0   | 1.03E-15  | 0         |
|                  | Tapidor_ERR037334             | 1   | 0.2252606 | 0.2252606 |
| BnaC02g05610.1D2 | Darmor_AUP_AOSW_2_D09BTACXX.I | 479 | 58.15144  | 52.03464  |
|                  | Darmor_AUP_BOSW_3_D09BTACXX.I | 172 | 25.51143  | 21.05608  |
|                  | Darmor_AUP_DOSW_2_D09BTACXX.I | 339 | 39.68554  | 34.507    |
|                  | Darmor_AUP_FOSW_4_D09BTACXX.I | 338 | 49.89699  | 42.2211   |
|                  | Darmor_AUP_HOSW_5_D09BTACXX.I | 248 | 40.5987   | 34.95497  |
|                  | Darmor_AUP_IAOSW_1_1_COUW4A   | 770 | 29.09844  | 26.65526  |
|                  | Darmor_AUP_KAOSW_2_1_COUW4A   | 936 | 38.36974  | 35.42806  |
|                  | Darmor_AUP_LAOSW_3_1_COUW4A   | 694 | 23.63687  | 21.32032  |
|                  | Darmor_AUP_MAOSW_4_1_COUW4A   | 953 | 33.74524  | 31.17805  |
|                  | Darmor_AUP_NAOSW_5_1_COUW4A   | 482 | 16.02605  | 14.20861  |

|  |                             |     |           |            |
|--|-----------------------------|-----|-----------|------------|
|  | Darmor_AUP_PAOSW_6_1_COUW4A | 731 | 28.08053  | 25.78969   |
|  | Ningyou_ERR037335           | 22  | 9.647213  | 5.102836   |
|  | TN04_ERR037297              | 14  | 4.06997   | 1.633325   |
|  | TN05_ERR037298              | 25  | 4.0126    | 2.091744   |
|  | TN08_ERR037301              | 5   | 0.8707576 | 0          |
|  | TN103_ERR037317             | 21  | 4.492329  | 1.958238   |
|  | TN108_ERR037318             | 16  | 5.776228  | 3.289946   |
|  | TN109_ERR037319             | 7   | 4.644198  | 1.211714   |
|  | TN10_ERR037294              | 27  | 10.3723   | 6.083649   |
|  | TN121_ERR037320             | 13  | 2.500262  | 0.9990895  |
|  | TN124_ERR037321             | 4   | 1.052223  | 0          |
|  | TN126_ERR037322             | 28  | 7.462723  | 4.407219   |
|  | TN128_ERR037323             | 0   | 3.07E-07  | 0          |
|  | TN129_ERR037324             | 23  | 9.597841  | 4.741196   |
|  | TN12_ERR037302              | 9   | 1.872715  | 0.6862768  |
|  | TN138_ERR037325             | 19  | 8.899919  | 3.465187   |
|  | TN149_ERR037326             | 6   | 3.639455  | 0          |
|  | TN161_ERR037327             | 7   | 2.025434  | 0.08253549 |
|  | TN163_ERR037328             | 37  | 6.58682   | 3.704832   |
|  | TN170_ERR037329             | 45  | 10.21211  | 5.61198    |
|  | TN171_ERR037332             | 0   | 7.12E-21  | 0          |
|  | TN172_ERR037333             | 50  | 19.39259  | 13.69413   |
|  | TN176_ERR037330             | 15  | 4.288025  | 1.045306   |
|  | TN177_ERR037331             | 3   | 0.9065643 | 0          |
|  | TN24_ERR037299              | 0   | 2.77E-18  | 0          |
|  | TN28_ERR037295              | 23  | 5.107838  | 1.950228   |
|  | TN30_ERR037305              | 12  | 3.521442  | 1.606803   |
|  | TN31_ERR037303              | 6   | 2.49585   | 0.5003817  |
|  | TN38_ERR037304              | 18  | 2.684363  | 1.241217   |
|  | TN44_ERR037306              | 15  | 2.604026  | 0.8794548  |
|  | TN48_ERR037307              | 8   | 1.546145  | 0.1183447  |
|  | TN51_ERR037308              | 26  | 13.29719  | 8.524607   |
|  | TN57_ERR037309              | 6   | 0.7587903 | 0          |

|                  |                               |      |           |           |
|------------------|-------------------------------|------|-----------|-----------|
|                  | TN72_ERR037312                | 4    | 2.153364  | 0         |
|                  | TN76_ERR037311                | 9    | 1.707694  | 0.2166823 |
|                  | TN77_ERR037310                | 0    | 3.14E-17  | 0         |
|                  | TN85_ERR037315                | 8    | 0.8933477 | 0.3966989 |
|                  | TN88_ERR037313                | 0    | 1.21E-22  | 0         |
|                  | TN90_ERR037316                | 3    | 1.855765  | 0.1293415 |
|                  | Tapidor_ERR037334             | 0    | 2.80E-15  | 0         |
| BnaC03g01420.1D2 | Darmor_AUP_AOSW_2_D09BTACXX.I | 976  | 375.7337  | 364.6867  |
|                  | Darmor_AUP_BOSW_3_D09BTACXX.I | 808  | 428.7438  | 428.2135  |
|                  | Darmor_AUP_DOSW_2_D09BTACXX.I | 1491 | 546.5017  | 544.8565  |
|                  | Darmor_AUP_FOSW_4_D09BTACXX.I | 142  | 64.18667  | 56.01926  |
|                  | Darmor_AUP_HOSW_5_D09BTACXX.I | 331  | 175.313   | 175.2959  |
|                  | Darmor_AUP_IAOSW_1_1_C0UW4A   | 1099 | 188.1577  | 188.132   |
|                  | Darmor_AUP_KAOSW_2_1_C0UW4A   | 975  | 168.2049  | 168.2049  |
|                  | Darmor_AUP_LAOSW_3_1_C0UW4A   | 284  | 46.82536  | 46.82536  |
|                  | Darmor_AUP_MAOSW_4_1_C0UW4A   | 291  | 48.75788  | 48.75788  |
|                  | Darmor_AUP_NAOSW_5_1_C0UW4A   | 281  | 48.95338  | 48.46902  |
|                  | Darmor_AUP_PAOSW_6_1_C0UW4A   | 1159 | 193.4483  | 191.6065  |
|                  | Ningyou_ERR037335             | 29   | 32.25464  | 18.73363  |
|                  | TN04_ERR037297                | 0    | 9.39E-34  | 0         |
|                  | TN05_ERR037298                | 0    | 6.65E-25  | 0         |
|                  | TN08_ERR037301                | 0    | 9.08E-33  | 0         |
|                  | TN103_ERR037317               | 0    | 3.09E-30  | 0         |
|                  | TN108_ERR037318               | 0    | 5.87E-30  | 0         |
|                  | TN109_ERR037319               | 0    | 4.41E-31  | 0         |
|                  | TN10_ERR037294                | 0    | 4.63E-25  | 0         |
|                  | TN121_ERR037320               | 0    | 4.38E-31  | 0         |
|                  | TN124_ERR037321               | 0    | 6.29E-27  | 0         |
|                  | TN126_ERR037322               | 0    | 1.40E-31  | 0         |
|                  | TN128_ERR037323               | 0    | 6.36E-32  | 0         |
|                  | TN129_ERR037324               | 0    | 2.14E-29  | 0         |
|                  | TN12_ERR037302                | 0    | 2.99E-31  | 0         |
|                  | TN138_ERR037325               | 0    | 4.63E-31  | 0         |

|                  |                               |      |          |          |
|------------------|-------------------------------|------|----------|----------|
|                  | TN149_ERR037326               | 0    | 2.36E-30 | 0        |
|                  | TN161_ERR037327               | 72   | 52.23678 | 49.17781 |
|                  | TN163_ERR037328               | 51   | 44.33629 | 34.98809 |
|                  | TN170_ERR037329               | 0    | 1.25E-21 | 0        |
|                  | TN171_ERR037332               | 0    | 2.85E-31 | 0        |
|                  | TN172_ERR037333               | 0    | 5.23E-32 | 0        |
|                  | TN176_ERR037330               | 0    | 1.82E-32 | 0        |
|                  | TN177_ERR037331               | 0    | 3.96E-31 | 0        |
|                  | TN24_ERR037299                | 0    | 1.27E-29 | 0        |
|                  | TN28_ERR037295                | 0    | 6.99E-31 | 0        |
|                  | TN30_ERR037305                | 0    | 9.08E-22 | 0        |
|                  | TN31_ERR037303                | 46   | 41.49689 | 26.29227 |
|                  | TN38_ERR037304                | 4    | 7.257668 | 7.255622 |
|                  | TN44_ERR037306                | 0    | 1.24E-29 | 0        |
|                  | TN48_ERR037307                | 0    | 1.76E-26 | 0        |
|                  | TN51_ERR037308                | 34   | 28.12235 | 27.48688 |
|                  | TN57_ERR037309                | 74   | 49.82061 | 38.75083 |
|                  | TN72_ERR037312                | 0    | 1.69E-30 | 0        |
|                  | TN76_ERR037311                | 0    | 4.29E-26 | 0        |
|                  | TN77_ERR037310                | 83   | 68.18577 | 56.32613 |
|                  | TN85_ERR037315                | 0    | 3.27E-26 | 0        |
|                  | TN88_ERR037313                | 0    | 1.85E-31 | 0        |
|                  | TN90_ERR037316                | 0    | 4.76E-31 | 0        |
|                  | Tapidor_ERR037334             | 0    | 4.05E-31 | 0        |
| BnaC03g01240.1D2 | Darmor_AUP_AOSW_2_D09BTACXX.I | 329  | 18.93125 | 16.82332 |
|                  | Darmor_AUP_BOSW_3_D09BTACXX.I | 343  | 22.66326 | 22.10787 |
|                  | Darmor_AUP_DOSW_2_D09BTACXX.I | 618  | 32.80293 | 30.7391  |
|                  | Darmor_AUP_FOSW_4_D09BTACXX.I | 722  | 42.98818 | 40.32265 |
|                  | Darmor_AUP_HOSW_5_D09BTACXX.I | 435  | 36.30569 | 33.13361 |
|                  | Darmor_AUP_IAOSW_1_1_C0UW4A   | 668  | 13.16641 | 12.57208 |
|                  | Darmor_AUP_KAOSW_2_1_C0UW4A   | 812  | 16.07471 | 15.84718 |
|                  | Darmor_AUP_LAOSW_3_1_C0UW4A   | 1970 | 39.40222 | 39.06919 |
|                  | Darmor_AUP_MAOSW_4_1_C0UW4A   | 2100 | 41.20447 | 40.92874 |

|  |                             |      |            |           |
|--|-----------------------------|------|------------|-----------|
|  | Darmor_AUP_NAOSW_5_1_COUW4A | 2042 | 40.06602   | 39.54423  |
|  | Darmor_AUP_PAOSW_6_1_COUW4A | 785  | 15.77892   | 15.77789  |
|  | Ningyou_ERR037335           | 254  | 30.77536   | 25.76413  |
|  | TN04_ERR037297              | 21   | 2.122667   | 0.7694138 |
|  | TN05_ERR037298              | 32   | 4.365476   | 3.156863  |
|  | TN08_ERR037301              | 32   | 2.33663    | 1.535424  |
|  | TN103_ERR037317             | 16   | 1.409474   | 0.8931431 |
|  | TN108_ERR037318             | 19   | 3.618741   | 3.068927  |
|  | TN109_ERR037319             | 0    | 5.49E-21   | 0         |
|  | TN10_ERR037294              | 0    | 0.00025937 | 0         |
|  | TN121_ERR037320             | 0    | 5.20E-20   | 0         |
|  | TN124_ERR037321             | 11   | 1.062276   | 0         |
|  | TN126_ERR037322             | 27   | 1.652607   | 1.383846  |
|  | TN128_ERR037323             | 21   | 1.238472   | 0.9708493 |
|  | TN129_ERR037324             | 0    | 3.11E-22   | 0         |
|  | TN12_ERR037302              | 26   | 1.811302   | 1.16747   |
|  | TN138_ERR037325             | 19   | 1.449932   | 1.202472  |
|  | TN149_ERR037326             | 30   | 2.458189   | 1.675193  |
|  | TN161_ERR037327             | 229  | 17.45239   | 15.42676  |
|  | TN163_ERR037328             | 334  | 23.36589   | 22.3356   |
|  | TN170_ERR037329             | 0    | 4.60E-26   | 0         |
|  | TN171_ERR037332             | 0    | 1.48E-26   | 0         |
|  | TN172_ERR037333             | 26   | 1.593742   | 0.7443928 |
|  | TN176_ERR037330             | 0    | 1.57E-26   | 0         |
|  | TN177_ERR037331             | 0    | 2.06E-24   | 0         |
|  | TN24_ERR037299              | 0    | 7.75E-24   | 0         |
|  | TN28_ERR037295              | 18   | 1.888799   | 0.3735902 |
|  | TN30_ERR037305              | 24   | 2.798755   | 2.036865  |
|  | TN31_ERR037303              | 340  | 27.55879   | 24.23059  |
|  | TN38_ERR037304              | 4    | 0.7427778  | 0         |
|  | TN44_ERR037306              | 14   | 3.384373   | 2.380645  |
|  | TN48_ERR037307              | 27   | 3.73014    | 2.016194  |
|  | TN51_ERR037308              | 254  | 24.47102   | 20.83488  |

|                  |                               |     |           |           |
|------------------|-------------------------------|-----|-----------|-----------|
|                  | TN57_ERR037309                | 374 | 25.58465  | 21.91905  |
|                  | TN72_ERR037312                | 2   | 0.1487114 | 0.1419322 |
|                  | TN76_ERR037311                | 19  | 2.132124  | 1.735787  |
|                  | TN77_ERR037310                | 386 | 30.31972  | 26.95275  |
|                  | TN85_ERR037315                | 0   | 1.44E-19  | 0         |
|                  | TN88_ERR037313                | 0   | 1.24E-26  | 0         |
|                  | TN90_ERR037316                | 0   | 1.79E-27  | 0         |
|                  | Tapidor_ERR037334             | 0   | 3.21E-27  | 0         |
| BnaC03g02570.1D2 | Darmor_AUP_AOSW_2_D09BTACXX.I | 0   | 0         | 0         |
|                  | Darmor_AUP_BOSW_3_D09BTACXX.I | 1   | 0.1772325 | 0.1772325 |
|                  | Darmor_AUP_DOSW_2_D09BTACXX.I | 0   | 0         | 0         |
|                  | Darmor_AUP_FOSW_4_D09BTACXX.I | 0   | 0         | 0         |
|                  | Darmor_AUP_HOSW_5_D09BTACXX.I | 0   | 0         | 0         |
|                  | Darmor_AUP_IAOSW_1_1_COUW4A   | 8   | 0.4315193 | 0.4315193 |
|                  | Darmor_AUP_KAOSW_2_1_COUW4A   | 2   | 0.1116509 | 0.1116509 |
|                  | Darmor_AUP_LAOSW_3_1_COUW4A   | 0   | 0         | 0         |
|                  | Darmor_AUP_MAOSW_4_1_COUW4A   | 0   | 0         | 0         |
|                  | Darmor_AUP_NAOSW_5_1_COUW4A   | 0   | 0         | 0         |
|                  | Darmor_AUP_PAOSW_6_1_COUW4A   | 7   | 0.3884271 | 0.3884271 |
|                  | Ningyou_ERR037335             | 0   | 0         | 0         |
|                  | TN04_ERR037297                | 0   | 0         | 0         |
|                  | TN05_ERR037298                | 0   | 0         | 0         |
|                  | TN08_ERR037301                | 0   | 0         | 0         |
|                  | TN103_ERR037317               | 0   | 0         | 0         |
|                  | TN108_ERR037318               | 0   | 0         | 0         |
|                  | TN109_ERR037319               | 0   | 0         | 0         |
|                  | TN10_ERR037294                | 0   | 0         | 0         |
|                  | TN121_ERR037320               | 0   | 0         | 0         |
|                  | TN124_ERR037321               | 0   | 0         | 0         |
|                  | TN126_ERR037322               | 0   | 0         | 0         |
|                  | TN128_ERR037323               | 0   | 0         | 0         |
|                  | TN129_ERR037324               | 0   | 0         | 0         |
|                  | TN12_ERR037302                | 0   | 0         | 0         |

|                  |                               |    |            |            |
|------------------|-------------------------------|----|------------|------------|
|                  | TN138_ERR037325               | 0  | 0          | 0          |
|                  | TN149_ERR037326               | 0  | 0          | 0          |
|                  | TN161_ERR037327               | 0  | 0          | 0          |
|                  | TN163_ERR037328               | 0  | 0          | 0          |
|                  | TN170_ERR037329               | 0  | 0          | 0          |
|                  | TN171_ERR037332               | 0  | 0          | 0          |
|                  | TN172_ERR037333               | 0  | 0          | 0          |
|                  | TN176_ERR037330               | 0  | 0          | 0          |
|                  | TN177_ERR037331               | 0  | 0          | 0          |
|                  | TN24_ERR037299                | 0  | 0          | 0          |
|                  | TN28_ERR037295                | 0  | 0          | 0          |
|                  | TN30_ERR037305                | 0  | 0          | 0          |
|                  | TN31_ERR037303                | 0  | 0          | 0          |
|                  | TN38_ERR037304                | 0  | 0          | 0          |
|                  | TN44_ERR037306                | 0  | 0          | 0          |
|                  | TN48_ERR037307                | 0  | 0          | 0          |
|                  | TN51_ERR037308                | 0  | 0          | 0          |
|                  | TN57_ERR037309                | 0  | 0          | 0          |
|                  | TN72_ERR037312                | 0  | 0          | 0          |
|                  | TN76_ERR037311                | 0  | 0          | 0          |
|                  | TN77_ERR037310                | 0  | 0          | 0          |
|                  | TN85_ERR037315                | 0  | 0          | 0          |
|                  | TN88_ERR037313                | 0  | 0          | 0          |
|                  | TN90_ERR037316                | 0  | 0          | 0          |
|                  | Tapidor_ERR037334             | 0  | 0          | 0          |
| BnaA03g30720.1D2 | Darmor_AUP_AOSW_2_D09BTACXX.I | 2  | 0.05665441 | 0.05665441 |
|                  | Darmor_AUP_BOSW_3_D09BTACXX.I | 16 | 0.6148227  | 0.6148227  |
|                  | Darmor_AUP_DOSW_2_D09BTACXX.I | 1  | 0.02704896 | 0.02704896 |
|                  | Darmor_AUP_FOSW_4_D09BTACXX.I | 1  | 0.03467474 | 0.03467474 |
|                  | Darmor_AUP_HOSW_5_D09BTACXX.I | 6  | 0.2408148  | 0.2408148  |
|                  | Darmor_AUP_IAOSW_1_1_C0UW4A   | 18 | 0.2316603  | 0.2316603  |
|                  | Darmor_AUP_KAOSW_2_1_C0UW4A   | 33 | 0.4253284  | 0.4253284  |
|                  | Darmor_AUP_LAOSW_3_1_C0UW4A   | 1  | 0.01233659 | 0.01233659 |



|  |                             |    |            |            |
|--|-----------------------------|----|------------|------------|
|  | Darmor_AUP_MAOSW_4_1_COUW4A | 2  | 0.024664   | 0.024664   |
|  | Darmor_AUP_NAOSW_5_1_COUW4A | 2  | 0.02510267 | 0.02510267 |
|  | Darmor_AUP_PAOSW_6_1_COUW4A | 29 | 0.364806   | 0.364806   |
|  | Ningyou_ERR037335           | 0  | 0          | 0          |
|  | TN04_ERR037297              | 0  | 0          | 0          |
|  | TN05_ERR037298              | 0  | 0          | 0          |
|  | TN08_ERR037301              | 0  | 0          | 0          |
|  | TN103_ERR037317             | 0  | 0          | 0          |
|  | TN108_ERR037318             | 0  | 0          | 0          |
|  | TN109_ERR037319             | 0  | 0          | 0          |
|  | TN10_ERR037294              | 0  | 0          | 0          |
|  | TN121_ERR037320             | 0  | 0          | 0          |
|  | TN124_ERR037321             | 0  | 0          | 0          |
|  | TN126_ERR037322             | 0  | 0          | 0          |
|  | TN128_ERR037323             | 0  | 0          | 0          |
|  | TN129_ERR037324             | 0  | 0          | 0          |
|  | TN12_ERR037302              | 0  | 0          | 0          |
|  | TN138_ERR037325             | 0  | 0          | 0          |
|  | TN149_ERR037326             | 0  | 0          | 0          |
|  | TN161_ERR037327             | 0  | 0          | 0          |
|  | TN163_ERR037328             | 0  | 0          | 0          |
|  | TN170_ERR037329             | 0  | 0          | 0          |
|  | TN171_ERR037332             | 0  | 0          | 0          |
|  | TN172_ERR037333             | 0  | 0          | 0          |
|  | TN176_ERR037330             | 0  | 0          | 0          |
|  | TN177_ERR037331             | 0  | 0          | 0          |
|  | TN24_ERR037299              | 0  | 0          | 0          |
|  | TN28_ERR037295              | 0  | 0          | 0          |
|  | TN30_ERR037305              | 0  | 0          | 0          |
|  | TN31_ERR037303              | 0  | 0          | 0          |
|  | TN38_ERR037304              | 0  | 0          | 0          |
|  | TN44_ERR037306              | 0  | 0          | 0          |
|  | TN48_ERR037307              | 0  | 0          | 0          |

|                  |                               |     |           |           |
|------------------|-------------------------------|-----|-----------|-----------|
|                  | TN51_ERR037308                | 0   | 0         | 0         |
|                  | TN57_ERR037309                | 0   | 0         | 0         |
|                  | TN72_ERR037312                | 0   | 0         | 0         |
|                  | TN76_ERR037311                | 0   | 0         | 0         |
|                  | TN77_ERR037310                | 0   | 0         | 0         |
|                  | TN85_ERR037315                | 0   | 0         | 0         |
|                  | TN88_ERR037313                | 0   | 0         | 0         |
|                  | TN90_ERR037316                | 0   | 0         | 0         |
|                  | Tapidor_ERR037334             | 0   | 0         | 0         |
| BnaU01g10730.1D2 | Darmor_AUP_AOSW_2_D09BTACXX.I | 22  | 1.814059  | 0.3747785 |
|                  | Darmor_AUP_BOSW_3_D09BTACXX.I | 13  | 1.340183  | 0.6637104 |
|                  | Darmor_AUP_DOSW_2_D09BTACXX.I | 49  | 6.04932   | 5.284559  |
|                  | Darmor_AUP_FOSW_4_D09BTACXX.I | 83  | 11.18834  | 8.819192  |
|                  | Darmor_AUP_HOSW_5_D09BTACXX.I | 36  | 5.114523  | 3.261963  |
|                  | Darmor_AUP_IAOSW_1_1_C0UW4A   | 17  | 1.109717  | 0.2613602 |
|                  | Darmor_AUP_KAOSW_2_1_C0UW4A   | 24  | 1.125146  | 0.8130621 |
|                  | Darmor_AUP_LAOSW_3_1_C0UW4A   | 139 | 9.90934   | 7.881545  |
|                  | Darmor_AUP_MAOSW_4_1_C0UW4A   | 143 | 8.620421  | 6.666839  |
|                  | Darmor_AUP_NAOSW_5_1_C0UW4A   | 131 | 6.538969  | 4.860929  |
|                  | Darmor_AUP_PAOSW_6_1_C0UW4A   | 27  | 0.9459374 | 0.6933315 |
|                  | Ningyou_ERR037335             | 15  | 4.621006  | 2.61803   |
|                  | TN04_ERR037297                | 12  | 1.43347   | 0         |
|                  | TN05_ERR037298                | 3   | 0.3346485 | 0.3232996 |
|                  | TN08_ERR037301                | 1   | 0.3006631 | 0         |
|                  | TN103_ERR037317               | 8   | 3.115021  | 0         |
|                  | TN108_ERR037318               | 9   | 1.286919  | 0         |
|                  | TN109_ERR037319               | 0   | 1.75E-26  | 0         |
|                  | TN10_ERR037294                | 1   | 0.4549175 | 0.4062626 |
|                  | TN121_ERR037320               | 12  | 2.144018  | 0.5539923 |
|                  | TN124_ERR037321               | 3   | 0.306836  | 0.2549156 |
|                  | TN126_ERR037322               | 0   | 1.73E-19  | 0         |
|                  | TN128_ERR037323               | 0   | 2.35E-18  | 0         |
|                  | TN129_ERR037324               | 0   | 1.65E-32  | 0         |

|                  |                               |    |           |           |
|------------------|-------------------------------|----|-----------|-----------|
|                  | TN12_ERR037302                | 0  | 7.26E-27  | 0         |
|                  | TN138_ERR037325               | 0  | 1.94E-11  | 0         |
|                  | TN149_ERR037326               | 3  | 1.242807  | 0         |
|                  | TN161_ERR037327               | 1  | 0.1481251 | 0.1481251 |
|                  | TN163_ERR037328               | 5  | 0.6296827 | 0.6281801 |
|                  | TN170_ERR037329               | 14 | 2.744859  | 1.502553  |
|                  | TN171_ERR037332               | 1  | 0.1034265 | 0.1034253 |
|                  | TN172_ERR037333               | 27 | 5.10464   | 1.859951  |
|                  | TN176_ERR037330               | 3  | 1.806306  | 1.607926  |
|                  | TN177_ERR037331               | 7  | 1.775017  | 0         |
|                  | TN24_ERR037299                | 0  | 1.57E-19  | 0         |
|                  | TN28_ERR037295                | 1  | 1.047783  | 1.047088  |
|                  | TN30_ERR037305                | 0  | 7.61E-30  | 0         |
|                  | TN31_ERR037303                | 2  | 0.237919  | 0.120521  |
|                  | TN38_ERR037304                | 3  | 0.3402365 | 0         |
|                  | TN44_ERR037306                | 3  | 1.343278  | 1.32939   |
|                  | TN48_ERR037307                | 3  | 0.3623984 | 0.353011  |
|                  | TN51_ERR037308                | 11 | 1.7224    | 0.5872979 |
|                  | TN57_ERR037309                | 2  | 0.3116617 | 0.3101395 |
|                  | TN72_ERR037312                | 0  | 5.82E-15  | 0         |
|                  | TN76_ERR037311                | 0  | 7.58E-05  | 0         |
|                  | TN77_ERR037310                | 0  | 0.1422029 | 0         |
|                  | TN85_ERR037315                | 10 | 2.413457  | 0         |
|                  | TN88_ERR037313                | 1  | 0.1088254 | 0.1087929 |
|                  | TN90_ERR037316                | 6  | 0.6943127 | 0.1752453 |
|                  | Tapidor_ERR037334             | 3  | 0.3884005 | 0.3871062 |
| BnaC05g20750.1D2 | Darmor_AUP_AOSW_2_D09BTACXX.I | 0  | 0         | 0         |
|                  | Darmor_AUP_BOSW_3_D09BTACXX.I | 0  | 0         | 0         |
|                  | Darmor_AUP_DOSW_2_D09BTACXX.I | 0  | 0         | 0         |
|                  | Darmor_AUP_FOSW_4_D09BTACXX.I | 0  | 0         | 0         |
|                  | Darmor_AUP_HOSW_5_D09BTACXX.I | 0  | 0         | 0         |
|                  | Darmor_AUP_IAOSW_1_1_C0UW4A   | 0  | 0         | 0         |
|                  | Darmor_AUP_KAOSW_2_1_C0UW4A   | 0  | 0         | 0         |

|  |                             |   |   |   |
|--|-----------------------------|---|---|---|
|  | Darmor_AUP_LAOSW_3_1_COUW4A | 0 | 0 | 0 |
|  | Darmor_AUP_MAOSW_4_1_COUW4A | 0 | 0 | 0 |
|  | Darmor_AUP_NAOSW_5_1_COUW4A | 0 | 0 | 0 |
|  | Darmor_AUP_PAOSW_6_1_COUW4A | 0 | 0 | 0 |
|  | Ningyou_ERR037335           | 0 | 0 | 0 |
|  | TN04_ERR037297              | 0 | 0 | 0 |
|  | TN05_ERR037298              | 0 | 0 | 0 |
|  | TN08_ERR037301              | 0 | 0 | 0 |
|  | TN103_ERR037317             | 0 | 0 | 0 |
|  | TN108_ERR037318             | 0 | 0 | 0 |
|  | TN109_ERR037319             | 0 | 0 | 0 |
|  | TN10_ERR037294              | 0 | 0 | 0 |
|  | TN121_ERR037320             | 0 | 0 | 0 |
|  | TN124_ERR037321             | 0 | 0 | 0 |
|  | TN126_ERR037322             | 0 | 0 | 0 |
|  | TN128_ERR037323             | 0 | 0 | 0 |
|  | TN129_ERR037324             | 0 | 0 | 0 |
|  | TN12_ERR037302              | 0 | 0 | 0 |
|  | TN138_ERR037325             | 0 | 0 | 0 |
|  | TN149_ERR037326             | 0 | 0 | 0 |
|  | TN161_ERR037327             | 0 | 0 | 0 |
|  | TN163_ERR037328             | 0 | 0 | 0 |
|  | TN170_ERR037329             | 0 | 0 | 0 |
|  | TN171_ERR037332             | 0 | 0 | 0 |
|  | TN172_ERR037333             | 0 | 0 | 0 |
|  | TN176_ERR037330             | 0 | 0 | 0 |
|  | TN177_ERR037331             | 0 | 0 | 0 |
|  | TN24_ERR037299              | 0 | 0 | 0 |
|  | TN28_ERR037295              | 0 | 0 | 0 |
|  | TN30_ERR037305              | 0 | 0 | 0 |
|  | TN31_ERR037303              | 0 | 0 | 0 |
|  | TN38_ERR037304              | 0 | 0 | 0 |
|  | TN44_ERR037306              | 0 | 0 | 0 |

|                  |                               |   |            |            |
|------------------|-------------------------------|---|------------|------------|
|                  | TN48_ERR037307                | 0 | 0          | 0          |
|                  | TN51_ERR037308                | 0 | 0          | 0          |
|                  | TN57_ERR037309                | 0 | 0          | 0          |
|                  | TN72_ERR037312                | 0 | 0          | 0          |
|                  | TN76_ERR037311                | 0 | 0          | 0          |
|                  | TN77_ERR037310                | 0 | 0          | 0          |
|                  | TN85_ERR037315                | 0 | 0          | 0          |
|                  | TN88_ERR037313                | 0 | 0          | 0          |
|                  | TN90_ERR037316                | 0 | 0          | 0          |
|                  | Tapidor_ERR037334             | 0 | 0          | 0          |
| BnaC06g03070.1D2 | Darmor_AUP_AOSW_2_D09BTACXX.I | 1 | 0.0574894  | 0.0574894  |
|                  | Darmor_AUP_BOSW_3_D09BTACXX.I | 3 | 0.2276234  | 0.2276234  |
|                  | Darmor_AUP_DOSW_2_D09BTACXX.I | 1 | 0.05143338 | 0.05143338 |
|                  | Darmor_AUP_FOSW_4_D09BTACXX.I | 0 | 0          | 0          |
|                  | Darmor_AUP_HOSW_5_D09BTACXX.I | 4 | 0.3135374  | 0.3135374  |
|                  | Darmor_AUP_IAOSW_1_1_C0UW4A   | 1 | 0.02205253 | 0.02205253 |
|                  | Darmor_AUP_KAOSW_2_1_C0UW4A   | 2 | 0.04469839 | 0.04469839 |
|                  | Darmor_AUP_LAOSW_3_1_C0UW4A   | 0 | 0          | 0          |
|                  | Darmor_AUP_MAOSW_4_1_C0UW4A   | 0 | 0          | 0          |
|                  | Darmor_AUP_NAOSW_5_1_C0UW4A   | 0 | 0          | 0          |
|                  | Darmor_AUP_PAOSW_6_1_C0UW4A   | 5 | 0.1165545  | 0.1165545  |
|                  | Ningyou_ERR037335             | 3 | 0.2803831  | 0.2803831  |
|                  | TN04_ERR037297                | 0 | 0          | 0          |
|                  | TN05_ERR037298                | 0 | 0          | 0          |
|                  | TN08_ERR037301                | 0 | 0          | 0          |
|                  | TN103_ERR037317               | 3 | 0.3211548  | 0.3211548  |
|                  | TN108_ERR037318               | 0 | 0          | 0          |
|                  | TN109_ERR037319               | 1 | 0.09148476 | 0.09148476 |
|                  | TN10_ERR037294                | 5 | 0.3624672  | 0.3624672  |
|                  | TN121_ERR037320               | 0 | 0          | 0          |
|                  | TN124_ERR037321               | 4 | 0.3102323  | 0.3102323  |
|                  | TN126_ERR037322               | 0 | 0          | 0          |
|                  | TN128_ERR037323               | 6 | 0.4462721  | 0.4462721  |

|                  |                               |     |           |           |
|------------------|-------------------------------|-----|-----------|-----------|
|                  | TN129_ERR037324               | 0   | 0         | 0         |
|                  | TN12_ERR037302                | 4   | 0.3252679 | 0.3252679 |
|                  | TN138_ERR037325               | 0   | 0         | 0         |
|                  | TN149_ERR037326               | 0   | 0         | 0         |
|                  | TN161_ERR037327               | 3   | 0.328158  | 0.328158  |
|                  | TN163_ERR037328               | 3   | 0.276141  | 0.276141  |
|                  | TN170_ERR037329               | 5   | 0.3921986 | 0.3921986 |
|                  | TN171_ERR037332               | 5   | 0.3632324 | 0.3632324 |
|                  | TN172_ERR037333               | 5   | 0.378917  | 0.378917  |
|                  | TN176_ERR037330               | 7   | 0.5138642 | 0.5138642 |
|                  | TN177_ERR037331               | 0   | 0         | 0         |
|                  | TN24_ERR037299                | 4   | 0.4227376 | 0.4227376 |
|                  | TN28_ERR037295                | 4   | 0.3017728 | 0.3017728 |
|                  | TN30_ERR037305                | 3   | 0.2404244 | 0.2404244 |
|                  | TN31_ERR037303                | 4   | 0.3382186 | 0.3382186 |
|                  | TN38_ERR037304                | 8   | 0.6494722 | 0.6494722 |
|                  | TN44_ERR037306                | 3   | 0.3337219 | 0.3337219 |
|                  | TN48_ERR037307                | 0   | 0         | 0         |
|                  | TN51_ERR037308                | 4   | 0.4035713 | 0.4035713 |
|                  | TN57_ERR037309                | 5   | 0.3903311 | 0.3903311 |
|                  | TN72_ERR037312                | 0   | 0         | 0         |
|                  | TN76_ERR037311                | 5   | 0.4299084 | 0.4299084 |
|                  | TN77_ERR037310                | 6   | 0.5133902 | 0.5133902 |
|                  | TN85_ERR037315                | 2   | 0.196044  | 0.196044  |
|                  | TN88_ERR037313                | 0   | 0         | 0         |
|                  | TN90_ERR037316                | 0   | 0         | 0         |
|                  | Tapidor_ERR037334             | 0   | 0         | 0         |
| BnaC03g01310.1D2 | Darmor_AUP_AOSW_2_D09BTACXX.I | 150 | 8.789344  | 7.427899  |
|                  | Darmor_AUP_BOSW_3_D09BTACXX.I | 260 | 21.79167  | 19.67434  |
|                  | Darmor_AUP_DOSW_2_D09BTACXX.I | 282 | 12.7034   | 10.57285  |
|                  | Darmor_AUP_FOSW_4_D09BTACXX.I | 105 | 6.790157  | 4.945178  |
|                  | Darmor_AUP_HOSW_5_D09BTACXX.I | 560 | 36.86864  | 34.27222  |
|                  | Darmor_AUP_IAOSW_1_1_COUW4AC  | 658 | 13.11679  | 12.91711  |

|  |                             |     |            |            |
|--|-----------------------------|-----|------------|------------|
|  | Darmor_AUP_KAOSW_2_1_COUW4A | 408 | 7.88225    | 7.661547   |
|  | Darmor_AUP_LAOSW_3_1_COUW4A | 360 | 6.941118   | 6.938844   |
|  | Darmor_AUP_MAOSW_4_1_COUW4A | 355 | 6.814326   | 6.542657   |
|  | Darmor_AUP_NAOSW_5_1_COUW4A | 298 | 5.693649   | 5.443007   |
|  | Darmor_AUP_PAOSW_6_1_COUW4A | 538 | 11.08162   | 10.28929   |
|  | Ningyou_ERR037335           | 13  | 1.338568   | 0.03906683 |
|  | TN04_ERR037297              | 1   | 0.06298227 | 0.06298192 |
|  | TN05_ERR037298              | 0   | 0.05897072 | 0.05897072 |
|  | TN08_ERR037301              | 0   | 9.33E-31   | 0          |
|  | TN103_ERR037317             | 0   | 1.48E-15   | 0          |
|  | TN108_ERR037318             | 0   | 7.01E-17   | 0          |
|  | TN109_ERR037319             | 0   | 0.1339321  | 0.133932   |
|  | TN10_ERR037294              | 0   | 9.52E-29   | 0          |
|  | TN121_ERR037320             | 0   | 6.20E-27   | 0          |
|  | TN124_ERR037321             | 0   | 0.112929   | 0.1129176  |
|  | TN126_ERR037322             | 0   | 0.05441094 | 0.05441094 |
|  | TN128_ERR037323             | 0   | 0.1632784  | 0.163254   |
|  | TN129_ERR037324             | 0   | 2.34E-16   | 0          |
|  | TN12_ERR037302              | 0   | 1.16E-07   | 1.16E-07   |
|  | TN138_ERR037325             | 0   | 6.87E-28   | 0          |
|  | TN149_ERR037326             | 0   | 2.00E-20   | 0          |
|  | TN161_ERR037327             | 13  | 2.646203   | 1.561538   |
|  | TN163_ERR037328             | 18  | 1.624379   | 0.4594963  |
|  | TN170_ERR037329             | 0   | 2.02E-20   | 0          |
|  | TN171_ERR037332             | 0   | 3.63E-27   | 0          |
|  | TN172_ERR037333             | 0   | 6.65E-19   | 0          |
|  | TN176_ERR037330             | 0   | 1.95E-29   | 0          |
|  | TN177_ERR037331             | 0   | 5.29E-20   | 0          |
|  | TN24_ERR037299              | 0   | 4.55E-20   | 0          |
|  | TN28_ERR037295              | 0   | 2.65E-24   | 0          |
|  | TN30_ERR037305              | 0   | 9.24E-17   | 0          |
|  | TN31_ERR037303              | 17  | 1.892609   | 0.2933503  |
|  | TN38_ERR037304              | 3   | 1.638264   | 0.0359094  |

|                  |                               |    |             |            |
|------------------|-------------------------------|----|-------------|------------|
|                  | TN44_ERR037306                | 0  | 1.47E-07    | 0          |
|                  | TN48_ERR037307                | 0  | 2.03E-23    | 0          |
|                  | TN51_ERR037308                | 19 | 2.374478    | 1.076999   |
|                  | TN57_ERR037309                | 24 | 2.211982    | 0.3943392  |
|                  | TN72_ERR037312                | 0  | 3.43E-07    | 0          |
|                  | TN76_ERR037311                | 1  | 0.07212034  | 0.07156005 |
|                  | TN77_ERR037310                | 23 | 2.930965    | 1.735787   |
|                  | TN85_ERR037315                | 0  | 0.1991505   | 0.1991505  |
|                  | TN88_ERR037313                | 0  | 0.07458814  | 0          |
|                  | TN90_ERR037316                | 0  | 1.95E-20    | 0          |
|                  | Tapidor_ERR037334             | 0  | 0.000119674 | 0          |
| BnaC06g28360.1D2 | Darmor_AUP_AOSW_2_D09BTACXX.I | 0  | 4.09E-30    | 0          |
|                  | Darmor_AUP_BOSW_3_D09BTACXX.I | 1  | 0.01588492  | 0.01588492 |
|                  | Darmor_AUP_DOSW_2_D09BTACXX.I | 0  | 6.24E-34    | 0          |
|                  | Darmor_AUP_FOSW_4_D09BTACXX.I | 0  | 3.84E-32    | 0          |
|                  | Darmor_AUP_HOSW_5_D09BTACXX.I | 9  | 0.1435557   | 0.1433747  |
|                  | Darmor_AUP_IAOSW_1_1_C0UW4A   | 1  | 0.00508663  | 0.00508663 |
|                  | Darmor_AUP_KAOSW_2_1_C0UW4A   | 1  | 0.03083763  | 0.03083763 |
|                  | Darmor_AUP_LAOSW_3_1_C0UW4A   | 0  | 1.48E-42    | 0          |
|                  | Darmor_AUP_MAOSW_4_1_C0UW4A   | 0  | 1.45E-42    | 0          |
|                  | Darmor_AUP_NAOSW_5_1_C0UW4A   | 0  | 3.30E-39    | 0          |
|                  | Darmor_AUP_PAOSW_6_1_C0UW4A   | 1  | 0.01524736  | 0.01522267 |
|                  | Ningyou_ERR037335             | 0  | 8.85E-28    | 0          |
|                  | TN04_ERR037297                | 0  | 6.99E-24    | 0          |
|                  | TN05_ERR037298                | 0  | 5.28E-31    | 0          |
|                  | TN08_ERR037301                | 0  | 2.52E-21    | 0          |
|                  | TN103_ERR037317               | 0  | 2.14E-16    | 0          |
|                  | TN108_ERR037318               | 0  | 9.84E-32    | 0          |
|                  | TN109_ERR037319               | 0  | 3.21E-21    | 0          |
|                  | TN10_ERR037294                | 0  | 1.01E-29    | 0          |
|                  | TN121_ERR037320               | 0  | 1.05E-21    | 0          |
|                  | TN124_ERR037321               | 0  | 2.20E-30    | 0          |
|                  | TN126_ERR037322               | 0  | 3.65E-24    | 0          |



|                  |                               |   |            |            |
|------------------|-------------------------------|---|------------|------------|
|                  | TN128_ERR037323               | 0 | 4.51E-28   | 0          |
|                  | TN129_ERR037324               | 0 | 1.10E-24   | 0          |
|                  | TN12_ERR037302                | 0 | 2.41E-24   | 0          |
|                  | TN138_ERR037325               | 0 | 6.32E-24   | 0          |
|                  | TN149_ERR037326               | 0 | 2.64E-29   | 0          |
|                  | TN161_ERR037327               | 0 | 3.46E-29   | 0          |
|                  | TN163_ERR037328               | 0 | 3.49E-29   | 0          |
|                  | TN170_ERR037329               | 0 | 2.64E-29   | 0          |
|                  | TN171_ERR037332               | 0 | 6.60E-22   | 0          |
|                  | TN172_ERR037333               | 0 | 3.39E-21   | 0          |
|                  | TN176_ERR037330               | 0 | 2.92E-24   | 0          |
|                  | TN177_ERR037331               | 0 | 0.01648223 | 0.01648223 |
|                  | TN24_ERR037299                | 0 | 9.11E-18   | 0          |
|                  | TN28_ERR037295                | 0 | 6.14E-16   | 0          |
|                  | TN30_ERR037305                | 0 | 6.06E-26   | 0          |
|                  | TN31_ERR037303                | 0 | 1.44E-23   | 0          |
|                  | TN38_ERR037304                | 0 | 2.67E-23   | 0          |
|                  | TN44_ERR037306                | 0 | 4.42E-25   | 0          |
|                  | TN48_ERR037307                | 0 | 8.19E-23   | 0          |
|                  | TN51_ERR037308                | 0 | 2.59E-30   | 0          |
|                  | TN57_ERR037309                | 0 | 4.52E-32   | 0          |
|                  | TN72_ERR037312                | 0 | 1.85E-23   | 0          |
|                  | TN76_ERR037311                | 0 | 5.31E-24   | 0          |
|                  | TN77_ERR037310                | 0 | 1.94E-18   | 0          |
|                  | TN85_ERR037315                | 0 | 3.61E-23   | 0          |
|                  | TN88_ERR037313                | 0 | 1.08E-17   | 0          |
|                  | TN90_ERR037316                | 0 | 8.86E-19   | 0          |
|                  | Tapidor_ERR037334             | 0 | 6.43E-14   | 0          |
| BnaC01g20150.1D2 | Darmor_AUP_AOSW_2_D09BTACXX.I | 0 | 5.86E-36   | 0          |
|                  | Darmor_AUP_BOSW_3_D09BTACXX.I | 0 | 1.17E-34   | 0          |
|                  | Darmor_AUP_DOSW_2_D09BTACXX.I | 0 | 0          | 0          |
|                  | Darmor_AUP_FOSW_4_D09BTACXX.I | 0 | 0          | 0          |
|                  | Darmor_AUP_HOSW_5_D09BTACXX.I | 0 | 0          | 0          |

|  |                             |   |          |   |
|--|-----------------------------|---|----------|---|
|  | Darmor_AUP_IAOSW_1_1_C0UW4A | 0 | 0        | 0 |
|  | Darmor_AUP_KAOSW_2_1_C0UW4A | 0 | 0        | 0 |
|  | Darmor_AUP_LAOSW_3_1_C0UW4A | 0 | 0        | 0 |
|  | Darmor_AUP_MAOSW_4_1_C0UW4A | 0 | 0        | 0 |
|  | Darmor_AUP_NAOSW_5_1_C0UW4A | 0 | 0        | 0 |
|  | Darmor_AUP_PAOSW_6_1_C0UW4A | 0 | 0        | 0 |
|  | Ningyou_ERR037335           | 0 | 7.03E-29 | 0 |
|  | TN04_ERR037297              | 0 | 1.94E-28 | 0 |
|  | TN05_ERR037298              | 0 | 4.87E-26 | 0 |
|  | TN08_ERR037301              | 0 | 5.97E-30 | 0 |
|  | TN103_ERR037317             | 0 | 2.09E-30 | 0 |
|  | TN108_ERR037318             | 0 | 2.01E-28 | 0 |
|  | TN109_ERR037319             | 0 | 8.89E-29 | 0 |
|  | TN10_ERR037294              | 0 | 6.36E-30 | 0 |
|  | TN121_ERR037320             | 0 | 1.80E-29 | 0 |
|  | TN124_ERR037321             | 0 | 9.73E-30 | 0 |
|  | TN126_ERR037322             | 0 | 7.04E-30 | 0 |
|  | TN128_ERR037323             | 0 | 5.02E-27 | 0 |
|  | TN129_ERR037324             | 0 | 3.52E-27 | 0 |
|  | TN12_ERR037302              | 0 | 2.55E-29 | 0 |
|  | TN138_ERR037325             | 0 | 1.14E-28 | 0 |
|  | TN149_ERR037326             | 0 | 1.46E-28 | 0 |
|  | TN161_ERR037327             | 0 | 9.69E-29 | 0 |
|  | TN163_ERR037328             | 0 | 1.01E-29 | 0 |
|  | TN170_ERR037329             | 0 | 1.81E-25 | 0 |
|  | TN171_ERR037332             | 0 | 7.92E-30 | 0 |
|  | TN172_ERR037333             | 0 | 9.27E-30 | 0 |
|  | TN176_ERR037330             | 0 | 2.84E-31 | 0 |
|  | TN177_ERR037331             | 0 | 3.08E-29 | 0 |
|  | TN24_ERR037299              | 0 | 6.68E-29 | 0 |
|  | TN28_ERR037295              | 0 | 5.33E-30 | 0 |
|  | TN30_ERR037305              | 0 | 2.17E-27 | 0 |
|  | TN31_ERR037303              | 0 | 2.18E-28 | 0 |

|                  |                               |      |            |             |
|------------------|-------------------------------|------|------------|-------------|
|                  | TN38_ERR037304                | 0    | 5.06E-27   | 0           |
|                  | TN44_ERR037306                | 0    | 1.82E-24   | 0           |
|                  | TN48_ERR037307                | 0    | 4.62E-30   | 0           |
|                  | TN51_ERR037308                | 0    | 1.18E-28   | 0           |
|                  | TN57_ERR037309                | 0    | 2.71E-30   | 0           |
|                  | TN72_ERR037312                | 0    | 1.13E-29   | 0           |
|                  | TN76_ERR037311                | 0    | 3.09E-29   | 0           |
|                  | TN77_ERR037310                | 0    | 1.21E-29   | 0           |
|                  | TN85_ERR037315                | 0    | 7.52E-30   | 0           |
|                  | TN88_ERR037313                | 0    | 2.45E-25   | 0           |
|                  | TN90_ERR037316                | 0    | 2.04E-26   | 0           |
|                  | Tapidor_ERR037334             | 0    | 5.07E-29   | 0           |
| BnaC02g07870.1D2 | Darmor_AUP_AOSW_2_D09BTACXX.I | 404  | 5.732407   | 5.206708    |
|                  | Darmor_AUP_BOSW_3_D09BTACXX.I | 417  | 7.148917   | 6.491246    |
|                  | Darmor_AUP_DOSW_2_D09BTACXX.I | 673  | 8.372936   | 7.733028    |
|                  | Darmor_AUP_FOSW_4_D09BTACXX.I | 303  | 3.94783    | 3.429566    |
|                  | Darmor_AUP_HOSW_5_D09BTACXX.I | 245  | 4.157927   | 3.678678    |
|                  | Darmor_AUP_IAOSW_1_1_COUW4A   | 1866 | 8.983334   | 8.712857    |
|                  | Darmor_AUP_KAOSW_2_1_COUW4A   | 1699 | 8.04525    | 7.748859    |
|                  | Darmor_AUP_LAOSW_3_1_COUW4A   | 903  | 4.686494   | 4.401937    |
|                  | Darmor_AUP_MAOSW_4_1_COUW4A   | 974  | 4.611447   | 4.396382    |
|                  | Darmor_AUP_NAOSW_5_1_COUW4A   | 1029 | 5.06641    | 4.876918    |
|                  | Darmor_AUP_PAOSW_6_1_COUW4A   | 1696 | 9.287854   | 8.934726    |
|                  | Ningyou_ERR037335             | 0    | 2.31E-23   | 0           |
|                  | TN04_ERR037297                | 1    | 0.1125323  | 0.109829    |
|                  | TN05_ERR037298                | 1    | 0.08271558 | 0.03188445  |
|                  | TN08_ERR037301                | 1    | 0.01670084 | 0.007658951 |
|                  | TN103_ERR037317               | 2    | 0.03805194 | 0.03540744  |
|                  | TN108_ERR037318               | 0    | 3.12E-23   | 0           |
|                  | TN109_ERR037319               | 0    | 1.35E-24   | 0           |
|                  | TN10_ERR037294                | 4    | 0.05762696 | 0.04361184  |
|                  | TN121_ERR037320               | 0    | 3.85E-23   | 0           |
|                  | TN124_ERR037321               | 1    | 0.01347458 | 0.0133388   |

|                  |                               |    |            |             |
|------------------|-------------------------------|----|------------|-------------|
|                  | TN126_ERR037322               | 0  | 2.06E-26   | 0           |
|                  | TN128_ERR037323               | 0  | 1.59E-24   | 0           |
|                  | TN129_ERR037324               | 0  | 8.93E-20   | 0           |
|                  | TN12_ERR037302                | 3  | 0.1081729  | 0.05902603  |
|                  | TN138_ERR037325               | 1  | 0.01728319 | 0.007341413 |
|                  | TN149_ERR037326               | 0  | 9.90E-19   | 0           |
|                  | TN161_ERR037327               | 0  | 3.19E-20   | 0           |
|                  | TN163_ERR037328               | 1  | 0.01645777 | 0.01627442  |
|                  | TN170_ERR037329               | 4  | 0.08653938 | 0.05667078  |
|                  | TN171_ERR037332               | 2  | 0.02648701 | 0           |
|                  | TN172_ERR037333               | 1  | 0.01304411 | 0.009021368 |
|                  | TN176_ERR037330               | 0  | 1.47E-21   | 0           |
|                  | TN177_ERR037331               | 1  | 0.0148038  | 0.009849841 |
|                  | TN24_ERR037299                | 0  | 3.33E-21   | 0           |
|                  | TN28_ERR037295                | 2  | 0.02669717 | 0.02113863  |
|                  | TN30_ERR037305                | 1  | 0.01518493 | 0           |
|                  | TN31_ERR037303                | 0  | 2.12E-18   | 0           |
|                  | TN38_ERR037304                | 1  | 0.01578563 | 0.01499919  |
|                  | TN44_ERR037306                | 0  | 7.69E-24   | 0           |
|                  | TN48_ERR037307                | 0  | 1.42E-19   | 0           |
|                  | TN51_ERR037308                | 0  | 3.52E-19   | 0           |
|                  | TN57_ERR037309                | 1  | 0.01393272 | 0.01381864  |
|                  | TN72_ERR037312                | 2  | 0.03378543 | 0.02890956  |
|                  | TN76_ERR037311                | 0  | 1.90E-21   | 0           |
|                  | TN77_ERR037310                | 2  | 0.1636969  | 0.1611449   |
|                  | TN85_ERR037315                | 2  | 0.03287135 | 0.03249297  |
|                  | TN88_ERR037313                | 1  | 0.01395762 | 0.01331493  |
|                  | TN90_ERR037316                | 1  | 0.01559259 | 0.01559126  |
|                  | Tapidor_ERR037334             | 3  | 0.04510741 | 0.04449277  |
| BnaU01g20600.1D2 | Darmor_AUP_AOSW_2_D09BTACXX.I | 83 | 2.14806    | 2.147649    |
|                  | Darmor_AUP_BOSW_3_D09BTACXX.I | 29 | 1.143235   | 0.9053996   |
|                  | Darmor_AUP_DOSW_2_D09BTACXX.I | 4  | 0.1294055  | 0.1293968   |
|                  | Darmor_AUP_FOSW_4_D09BTACXX.I | 3  | 0.1409379  | 0.1409379   |

|  |                               |     |            |            |
|--|-------------------------------|-----|------------|------------|
|  | Darmor_AUP_HOSW_5_D09BTACXX.I | 51  | 2.084793   | 2.020895   |
|  | Darmor_AUP_IAOSW_1_1_COUW4A   | 58  | 0.5280138  | 0.3271252  |
|  | Darmor_AUP_KAOSW_2_1_COUW4A   | 118 | 1.151167   | 1.047258   |
|  | Darmor_AUP_LAOSW_3_1_COUW4A   | 16  | 0.1460524  | 0.1460524  |
|  | Darmor_AUP_MAOSW_4_1_COUW4A   | 23  | 0.2076184  | 0.2076184  |
|  | Darmor_AUP_NAOSW_5_1_COUW4A   | 17  | 0.1726575  | 0.1610737  |
|  | Darmor_AUP_PAOSW_6_1_COUW4A   | 64  | 0.6320568  | 0.6184237  |
|  | Ningyou_ERR037335             | 2   | 0.07653948 | 0.07653948 |
|  | TN04_ERR037297                | 1   | 0.032976   | 0.02806718 |
|  | TN05_ERR037298                | 2   | 0.0960444  | 0.0960444  |
|  | TN08_ERR037301                | 3   | 0.09281514 | 0.07646485 |
|  | TN103_ERR037317               | 0   | 0          | 0          |
|  | TN108_ERR037318               | 0   | 0.02102005 | 0          |
|  | TN109_ERR037319               | 3   | 0.1065449  | 0.1065449  |
|  | TN10_ERR037294                | 2   | 0.0868222  | 0.0868222  |
|  | TN121_ERR037320               | 0   | 1.47E-07   | 0          |
|  | TN124_ERR037321               | 0   | 7.28E-05   | 0          |
|  | TN126_ERR037322               | 1   | 0.0294409  | 0.0294409  |
|  | TN128_ERR037323               | 0   | 1.32E-07   | 0          |
|  | TN129_ERR037324               | 5   | 0.1432812  | 0.05850104 |
|  | TN12_ERR037302                | 1   | 0.09385894 | 0.09385894 |
|  | TN138_ERR037325               | 0   | 0          | 0          |
|  | TN149_ERR037326               | 0   | 0.07943035 | 0.07838169 |
|  | TN161_ERR037327               | 0   | 0          | 0          |
|  | TN163_ERR037328               | 1   | 0.03304687 | 0.03304687 |
|  | TN170_ERR037329               | 1   | 0.0297388  | 0.0297388  |
|  | TN171_ERR037332               | 1   | 0.02822869 | 0.02621378 |
|  | TN172_ERR037333               | 1   | 0.02929452 | 0.02929452 |
|  | TN176_ERR037330               | 1   | 0.02793723 | 0.02793723 |
|  | TN177_ERR037331               | 1   | 0.03025684 | 0.02704877 |
|  | TN24_ERR037299                | 0   | 1.13E-08   | 0          |
|  | TN28_ERR037295                | 5   | 0.1407271  | 0.1293878  |
|  | TN30_ERR037305                | 0   | 0          | 0          |

|                  |                               |     |            |              |
|------------------|-------------------------------|-----|------------|--------------|
|                  | TN31_ERR037303                | 3   | 0.1004561  | 0.100456     |
|                  | TN38_ERR037304                | 1   | 0.03212267 | 0.03212267   |
|                  | TN44_ERR037306                | 0   | 7.74E-10   | 7.72E-10     |
|                  | TN48_ERR037307                | 0   | 0.03603583 | 0.0008124507 |
|                  | TN51_ERR037308                | 2   | 0.1333305  | 0            |
|                  | TN57_ERR037309                | 1   | 0.05916306 | 0.05912761   |
|                  | TN72_ERR037312                | 0   | 0.07165717 | 0            |
|                  | TN76_ERR037311                | 0   | 1.64E-10   | 0            |
|                  | TN77_ERR037310                | 0   | 3.09E-29   | 0            |
|                  | TN85_ERR037315                | 0   | 1.60E-08   | 1.60E-08     |
|                  | TN88_ERR037313                | 0   | 1.12E-34   | 0            |
|                  | TN90_ERR037316                | 0   | 4.26E-08   | 0            |
|                  | Tapidor_ERR037334             | 0   | 2.56E-32   | 0            |
| BnaC03g06560.1D2 | Darmor_AUP_AOSW_2_D09BTACXX.I | 131 | 6.43214    | 5.32354      |
|                  | Darmor_AUP_BOSW_3_D09BTACXX.I | 190 | 11.30288   | 9.484012     |
|                  | Darmor_AUP_DOSW_2_D09BTACXX.I | 416 | 14.82213   | 13.34231     |
|                  | Darmor_AUP_FOSW_4_D09BTACXX.I | 204 | 8.044157   | 6.773474     |
|                  | Darmor_AUP_HOSW_5_D09BTACXX.I | 143 | 6.157409   | 4.883131     |
|                  | Darmor_AUP_IAOSW_1_1_COUW4A   | 415 | 6.708562   | 6.300674     |
|                  | Darmor_AUP_KAOSW_2_1_COUW4A   | 378 | 6.018853   | 5.600244     |
|                  | Darmor_AUP_LAOSW_3_1_COUW4A   | 752 | 10.9013    | 10.29165     |
|                  | Darmor_AUP_MAOSW_4_1_COUW4A   | 730 | 11.56132   | 11.46821     |
|                  | Darmor_AUP_NAOSW_5_1_COUW4A   | 632 | 9.115113   | 8.730929     |
|                  | Darmor_AUP_PAOSW_6_1_COUW4A   | 425 | 6.357645   | 6.073942     |
|                  | Ningyou_ERR037335             | 18  | 1.24213    | 0.8748249    |
|                  | TN04_ERR037297                | 0   | 1.30E-25   | 0            |
|                  | TN05_ERR037298                | 0   | 4.13E-26   | 0            |
|                  | TN08_ERR037301                | 0   | 6.04E-19   | 0            |
|                  | TN103_ERR037317               | 0   | 3.01E-20   | 0            |
|                  | TN108_ERR037318               | 0   | 1.66E-25   | 0            |
|                  | TN109_ERR037319               | 0   | 2.58E-25   | 0            |
|                  | TN10_ERR037294                | 0   | 6.09E-26   | 0            |
|                  | TN121_ERR037320               | 0   | 4.15E-26   | 0            |

|                  |                               |    |           |           |
|------------------|-------------------------------|----|-----------|-----------|
|                  | TN124_ERR037321               | 0  | 1.15E-26  | 0         |
|                  | TN126_ERR037322               | 18 | 1.515023  | 1.359452  |
|                  | TN128_ERR037323               | 0  | 1.24E-26  | 0         |
|                  | TN129_ERR037324               | 0  | 3.94E-22  | 0         |
|                  | TN12_ERR037302                | 0  | 5.06E-23  | 0         |
|                  | TN138_ERR037325               | 0  | 3.34E-16  | 0         |
|                  | TN149_ERR037326               | 0  | 2.42E-25  | 0         |
|                  | TN161_ERR037327               | 2  | 0.1480072 | 0         |
|                  | TN163_ERR037328               | 15 | 2.092262  | 0.8223218 |
|                  | TN170_ERR037329               | 0  | 1.47E-25  | 0         |
|                  | TN171_ERR037332               | 0  | 6.98E-26  | 0         |
|                  | TN172_ERR037333               | 0  | 3.63E-21  | 0         |
|                  | TN176_ERR037330               | 0  | 1.27E-18  | 0         |
|                  | TN177_ERR037331               | 0  | 9.27E-26  | 0         |
|                  | TN24_ERR037299                | 0  | 1.54E-23  | 0         |
|                  | TN28_ERR037295                | 0  | 1.56E-26  | 0         |
|                  | TN30_ERR037305                | 0  | 1.06E-22  | 0         |
|                  | TN31_ERR037303                | 0  | 8.35E-18  | 0         |
|                  | TN38_ERR037304                | 0  | 9.85E-21  | 0         |
|                  | TN44_ERR037306                | 0  | 9.41E-20  | 0         |
|                  | TN48_ERR037307                | 0  | 6.02E-17  | 0         |
|                  | TN51_ERR037308                | 12 | 2.514927  | 1.391584  |
|                  | TN57_ERR037309                | 18 | 1.353372  | 0.2611251 |
|                  | TN72_ERR037312                | 0  | 1.12E-17  | 0         |
|                  | TN76_ERR037311                | 0  | 1.86E-25  | 0         |
|                  | TN77_ERR037310                | 0  | 1.34E-24  | 0         |
|                  | TN85_ERR037315                | 0  | 1.83E-24  | 0         |
|                  | TN88_ERR037313                | 0  | 2.87E-25  | 0         |
|                  | TN90_ERR037316                | 0  | 9.52E-26  | 0         |
|                  | Tapidor_ERR037334             | 0  | 1.22E-19  | 0         |
| BnaA09g37250.1D2 | Darmor_AUP_AOSW_2_D09BTACXX.I | 0  | 0         | 0         |
|                  | Darmor_AUP_BOSW_3_D09BTACXX.I | 0  | 0.9798045 | 0         |
|                  | Darmor_AUP_DOSW_2_D09BTACXX.I | 0  | 0         | 0         |

|  |                               |   |            |           |
|--|-------------------------------|---|------------|-----------|
|  | Darmor_AUP_FOSW_4_D09BTACXX.I | 0 | 6.00E-35   | 0         |
|  | Darmor_AUP_HOSW_5_D09BTACXX.I | 0 | 0          | 0         |
|  | Darmor_AUP_IAOSW_1_1_C0UW4A   | 0 | 0.2716188  | 0.2716144 |
|  | Darmor_AUP_KAOSW_2_1_C0UW4A   | 3 | 0.8459328  | 0.8459328 |
|  | Darmor_AUP_LAOSW_3_1_C0UW4A   | 0 | 0          | 0         |
|  | Darmor_AUP_MAOSW_4_1_C0UW4A   | 0 | 0          | 0         |
|  | Darmor_AUP_NAOSW_5_1_C0UW4A   | 0 | 0          | 0         |
|  | Darmor_AUP_PAOSW_6_1_C0UW4A   | 1 | 1.635382   | 1.366071  |
|  | Ningyou_ERR037335             | 0 | 3.048798   | 0         |
|  | TN04_ERR037297                | 0 | 2.79E-30   | 0         |
|  | TN05_ERR037298                | 0 | 5.20E-29   | 0         |
|  | TN08_ERR037301                | 0 | 1.38E-15   | 0         |
|  | TN103_ERR037317               | 0 | 4.94E-07   | 0         |
|  | TN108_ERR037318               | 0 | 7.68E-07   | 0         |
|  | TN109_ERR037319               | 0 | 0.1046047  | 0         |
|  | TN10_ERR037294                | 0 | 5.09E-11   | 0         |
|  | TN121_ERR037320               | 0 | 6.307374   | 0         |
|  | TN124_ERR037321               | 0 | 1.38E-29   | 0         |
|  | TN126_ERR037322               | 0 | 0.6483557  | 0         |
|  | TN128_ERR037323               | 0 | 1.13E-29   | 0         |
|  | TN129_ERR037324               | 0 | 6.33E-19   | 0         |
|  | TN12_ERR037302                | 0 | 1.66E-17   | 0         |
|  | TN138_ERR037325               | 0 | 0.02961953 | 0         |
|  | TN149_ERR037326               | 0 | 8.30E-30   | 0         |
|  | TN161_ERR037327               | 0 | 4.31E-29   | 0         |
|  | TN163_ERR037328               | 0 | 2.73E-13   | 0         |
|  | TN170_ERR037329               | 0 | 5.43E-28   | 0         |
|  | TN171_ERR037332               | 0 | 7.97E-19   | 0         |
|  | TN172_ERR037333               | 0 | 1.22E-31   | 0         |
|  | TN176_ERR037330               | 0 | 4.43E-29   | 0         |
|  | TN177_ERR037331               | 0 | 3.15E-27   | 0         |
|  | TN24_ERR037299                | 0 | 1.84E-27   | 0         |
|  | TN28_ERR037295                | 0 | 8.53E-28   | 0         |



|                  |                               |    |          |           |
|------------------|-------------------------------|----|----------|-----------|
|                  | TN30_ERR037305                | 0  | 5.92E-30 | 0         |
|                  | TN31_ERR037303                | 0  | 1.26E-30 | 0         |
|                  | TN38_ERR037304                | 0  | 5.01E-29 | 0         |
|                  | TN44_ERR037306                | 0  | 2.41E-28 | 0         |
|                  | TN48_ERR037307                | 0  | 1.98E-18 | 0         |
|                  | TN51_ERR037308                | 0  | 7.93E-25 | 0         |
|                  | TN57_ERR037309                | 0  | 1.71E-05 | 0         |
|                  | TN72_ERR037312                | 0  | 9.01E-15 | 0         |
|                  | TN76_ERR037311                | 0  | 7.76E-30 | 0         |
|                  | TN77_ERR037310                | 0  | 3.01E-31 | 0         |
|                  | TN85_ERR037315                | 0  | 7.80E-24 | 0         |
|                  | TN88_ERR037313                | 0  | 1.01E-24 | 0         |
|                  | TN90_ERR037316                | 0  | 1.20E-28 | 0         |
|                  | Tapidor_ERR037334             | 0  | 5.07E-30 | 0         |
| BnaC01g32710.1D2 | Darmor_AUP_AOSW_2_D09BTACXX.I | 10 | 45.60932 | 19.47794  |
|                  | Darmor_AUP_BOSW_3_D09BTACXX.I | 9  | 40.23079 | 7.163684  |
|                  | Darmor_AUP_DOSW_2_D09BTACXX.I | 10 | 31.1767  | 16.39007  |
|                  | Darmor_AUP_FOSW_4_D09BTACXX.I | 5  | 14.23264 | 0         |
|                  | Darmor_AUP_HOSW_5_D09BTACXX.I | 10 | 30.69341 | 4.492994  |
|                  | Darmor_AUP_IAOSW_1_1_C0UW4A   | 23 | 8.993292 | 2.284806  |
|                  | Darmor_AUP_KAOSW_2_1_C0UW4A   | 24 | 14.78101 | 14.05177  |
|                  | Darmor_AUP_LAOSW_3_1_C0UW4A   | 7  | 3.829686 | 3.786799  |
|                  | Darmor_AUP_MAOSW_4_1_C0UW4A   | 7  | 4.959592 | 3.98354   |
|                  | Darmor_AUP_NAOSW_5_1_C0UW4A   | 3  | 1.198669 | 1.195234  |
|                  | Darmor_AUP_PAOSW_6_1_C0UW4A   | 22 | 14.17843 | 10.4131   |
|                  | Ningyou_ERR037335             | 5  | 7.763105 | 7.623594  |
|                  | TN04_ERR037297                | 7  | 11.7043  | 11.70365  |
|                  | TN05_ERR037298                | 5  | 7.243192 | 5.205047  |
|                  | TN08_ERR037301                | 6  | 10.69937 | 10.44604  |
|                  | TN103_ERR037317               | 2  | 3.3399   | 3.339888  |
|                  | TN108_ERR037318               | 3  | 4.859576 | 2.115402  |
|                  | TN109_ERR037319               | 0  | 7.24E-12 | 0         |
|                  | TN10_ERR037294                | 3  | 3.442703 | 0.5914118 |

|                  |                               |    |           |           |
|------------------|-------------------------------|----|-----------|-----------|
|                  | TN121_ERR037320               | 0  | 6.01E-25  | 0         |
|                  | TN124_ERR037321               | 0  | 1.89E-09  | 0         |
|                  | TN126_ERR037322               | 0  | 3.96E-21  | 0         |
|                  | TN128_ERR037323               | 4  | 4.55606   | 4.45088   |
|                  | TN129_ERR037324               | 2  | 2.409566  | 1.689883  |
|                  | TN12_ERR037302                | 0  | 1.10E-14  | 0         |
|                  | TN138_ERR037325               | 0  | 9.00E-07  | 0         |
|                  | TN149_ERR037326               | 2  | 3.424172  | 3.024232  |
|                  | TN161_ERR037327               | 3  | 4.007111  | 1.520165  |
|                  | TN163_ERR037328               | 4  | 5.288968  | 5.267876  |
|                  | TN170_ERR037329               | 0  | 4.45E-06  | 0         |
|                  | TN171_ERR037332               | 3  | 10.35699  | 10.02284  |
|                  | TN172_ERR037333               | 0  | 1.02E-17  | 0         |
|                  | TN176_ERR037330               | 3  | 8.745892  | 8.171959  |
|                  | TN177_ERR037331               | 0  | 8.23E-24  | 0         |
|                  | TN24_ERR037299                | 0  | 1.04E-05  | 0         |
|                  | TN28_ERR037295                | 3  | 3.338107  | 2.668959  |
|                  | TN30_ERR037305                | 3  | 3.959038  | 0         |
|                  | TN31_ERR037303                | 4  | 8.970282  | 8.742791  |
|                  | TN38_ERR037304                | 0  | 3.745081  | 0         |
|                  | TN44_ERR037306                | 2  | 5.41656   | 0.8674973 |
|                  | TN48_ERR037307                | 0  | 1.01E-26  | 0         |
|                  | TN51_ERR037308                | 0  | 2.40E-14  | 0         |
|                  | TN57_ERR037309                | 2  | 2.275054  | 2.255622  |
|                  | TN72_ERR037312                | 3  | 4.047446  | 2.919903  |
|                  | TN76_ERR037311                | 2  | 8.500907  | 0         |
|                  | TN77_ERR037310                | 1  | 1.227511  | 0.9717611 |
|                  | TN85_ERR037315                | 0  | 0.6167611 | 0         |
|                  | TN88_ERR037313                | 3  | 3.590229  | 2.590294  |
|                  | TN90_ERR037316                | 2  | 8.867248  | 0.4209298 |
|                  | Tapidor_ERR037334             | 0  | 8.82E-08  | 0         |
| BnaU01g27050.1D2 | Darmor_AUP_AOSW_2_D09BTACXX.I | 32 | 14.52563  | 14.10013  |
|                  | Darmor_AUP_BOSW_3_D09BTACXX.I | 18 | 10.74814  | 1.450098  |

|  |                               |    |          |          |
|--|-------------------------------|----|----------|----------|
|  | Darmor_AUP_DOSW_2_D09BTACXX.I | 10 | 4.056813 | 3.554745 |
|  | Darmor_AUP_FOSW_4_D09BTACXX.I | 26 | 12.70644 | 12.68829 |
|  | Darmor_AUP_HOSW_5_D09BTACXX.I | 24 | 14.60099 | 3.341353 |
|  | Darmor_AUP_IAOSW_1_1_COUW4A   | 55 | 8.49362  | 8.426262 |
|  | Darmor_AUP_KAOSW_2_1_COUW4A   | 38 | 6.283828 | 6.283827 |
|  | Darmor_AUP_LAOSW_3_1_COUW4A   | 13 | 2.108976 | 2.108976 |
|  | Darmor_AUP_MAOSW_4_1_COUW4A   | 26 | 4.266244 | 4.266244 |
|  | Darmor_AUP_NAOSW_5_1_COUW4A   | 13 | 2.168516 | 2.164057 |
|  | Darmor_AUP_PAOSW_6_1_COUW4A   | 43 | 7.22887  | 6.324287 |
|  | Ningyou_ERR037335             | 4  | 3.14716  | 3.143164 |
|  | TN04_ERR037297                | 0  | 2.77E-28 | 0        |
|  | TN05_ERR037298                | 0  | 7.72E-29 | 0        |
|  | TN08_ERR037301                | 0  | 4.24E-32 | 0        |
|  | TN103_ERR037317               | 0  | 9.04E-30 | 0        |
|  | TN108_ERR037318               | 0  | 3.92E-29 | 0        |
|  | TN109_ERR037319               | 0  | 3.70E-30 | 0        |
|  | TN10_ERR037294                | 0  | 6.21E-27 | 0        |
|  | TN121_ERR037320               | 0  | 1.00E-30 | 0        |
|  | TN124_ERR037321               | 0  | 7.54E-32 | 0        |
|  | TN126_ERR037322               | 0  | 9.49E-29 | 0        |
|  | TN128_ERR037323               | 0  | 9.55E-27 | 0        |
|  | TN129_ERR037324               | 0  | 6.17E-28 | 0        |
|  | TN12_ERR037302                | 0  | 4.47E-29 | 0        |
|  | TN138_ERR037325               | 0  | 8.23E-28 | 0        |
|  | TN149_ERR037326               | 0  | 1.64E-29 | 0        |
|  | TN161_ERR037327               | 6  | 6.916462 | 6.353054 |
|  | TN163_ERR037328               | 9  | 12.95245 | 12.03907 |
|  | TN170_ERR037329               | 0  | 1.89E-28 | 0        |
|  | TN171_ERR037332               | 0  | 1.05E-25 | 0        |
|  | TN172_ERR037333               | 0  | 5.43E-29 | 0        |
|  | TN176_ERR037330               | 0  | 1.29E-31 | 0        |
|  | TN177_ERR037331               | 0  | 6.54E-31 | 0        |
|  | TN24_ERR037299                | 0  | 1.88E-24 | 0        |

|                  |                               |    |           |           |
|------------------|-------------------------------|----|-----------|-----------|
|                  | TN28_ERR037295                | 0  | 4.21E-29  | 0         |
|                  | TN30_ERR037305                | 0  | 5.04E-31  | 0         |
|                  | TN31_ERR037303                | 12 | 8.204851  | 2.510503  |
|                  | TN38_ERR037304                | 0  | 2.67E-24  | 0         |
|                  | TN44_ERR037306                | 0  | 2.93E-28  | 0         |
|                  | TN48_ERR037307                | 0  | 1.15E-27  | 0         |
|                  | TN51_ERR037308                | 5  | 9.375539  | 1.557412  |
|                  | TN57_ERR037309                | 10 | 8.454522  | 1.673916  |
|                  | TN72_ERR037312                | 0  | 0         | 0         |
|                  | TN76_ERR037311                | 0  | 2.60E-18  | 0         |
|                  | TN77_ERR037310                | 18 | 16.2532   | 16.03436  |
|                  | TN85_ERR037315                | 0  | 1.07E-29  | 0         |
|                  | TN88_ERR037313                | 0  | 1.87E-30  | 0         |
|                  | TN90_ERR037316                | 0  | 1.96E-17  | 0         |
|                  | Tapidor_ERR037334             | 0  | 2.19E-23  | 0         |
| BnaU01g00010.1D2 | Darmor_AUP_AOSW_2_D09BTACXX.I | 57 | 16.89339  | 14.23399  |
|                  | Darmor_AUP_BOSW_3_D09BTACXX.I | 54 | 21.28361  | 18.14677  |
|                  | Darmor_AUP_DOSW_2_D09BTACXX.I | 83 | 22.28985  | 22.15614  |
|                  | Darmor_AUP_FOSW_4_D09BTACXX.I | 67 | 21.75456  | 21.7514   |
|                  | Darmor_AUP_HOSW_5_D09BTACXX.I | 51 | 22.83198  | 22.45979  |
|                  | Darmor_AUP_IAOSW_1_1_C0UW4A   | 26 | 3.53451   | 3.53451   |
|                  | Darmor_AUP_KAOSW_2_1_C0UW4A   | 26 | 3.521484  | 3.521484  |
|                  | Darmor_AUP_LAOSW_3_1_C0UW4A   | 37 | 4.810671  | 4.810671  |
|                  | Darmor_AUP_MAOSW_4_1_C0UW4A   | 44 | 5.950598  | 5.950598  |
|                  | Darmor_AUP_NAOSW_5_1_C0UW4A   | 20 | 2.716894  | 2.716894  |
|                  | Darmor_AUP_PAOSW_6_1_C0UW4A   | 36 | 4.764784  | 4.513294  |
|                  | Ningyou_ERR037335             | 8  | 4.37469   | 4.075084  |
|                  | TN04_ERR037297                | 8  | 3.270481  | 3.270467  |
|                  | TN05_ERR037298                | 1  | 0.3940869 | 0.3925269 |
|                  | TN08_ERR037301                | 6  | 3.481892  | 2.671394  |
|                  | TN103_ERR037317               | 7  | 3.604755  | 3.249857  |
|                  | TN108_ERR037318               | 0  | 0         | 0         |
|                  | TN109_ERR037319               | 1  | 0.4510819 | 0.4510819 |

|                  |                               |    |           |           |
|------------------|-------------------------------|----|-----------|-----------|
|                  | TN10_ERR037294                | 4  | 1.840247  | 1.758603  |
|                  | TN121_ERR037320               | 6  | 2.558156  | 0         |
|                  | TN124_ERR037321               | 6  | 2.266284  | 2.194984  |
|                  | TN126_ERR037322               | 0  | 8.70E-25  | 0         |
|                  | TN128_ERR037323               | 0  | 3.96E-18  | 0         |
|                  | TN129_ERR037324               | 6  | 4.028042  | 2.28594   |
|                  | TN12_ERR037302                | 8  | 6.457431  | 3.132876  |
|                  | TN138_ERR037325               | 2  | 0.8942193 | 0.8942193 |
|                  | TN149_ERR037326               | 0  | 4.14E-24  | 0         |
|                  | TN161_ERR037327               | 0  | 2.84E-23  | 0         |
|                  | TN163_ERR037328               | 1  | 0.4212436 | 0.4212435 |
|                  | TN170_ERR037329               | 0  | 2.34E-25  | 0         |
|                  | TN171_ERR037332               | 12 | 5.92286   | 1.688594  |
|                  | TN172_ERR037333               | 6  | 5.114919  | 1.79812   |
|                  | TN176_ERR037330               | 16 | 6.64224   | 6.508261  |
|                  | TN177_ERR037331               | 2  | 0.825727  | 0.8237657 |
|                  | TN24_ERR037299                | 0  | 2.73E-15  | 0         |
|                  | TN28_ERR037295                | 6  | 4.033558  | 0.6528034 |
|                  | TN30_ERR037305                | 6  | 3.015295  | 1.248812  |
|                  | TN31_ERR037303                | 4  | 2.159996  | 0         |
|                  | TN38_ERR037304                | 4  | 1.82229   | 1.82229   |
|                  | TN44_ERR037306                | 3  | 4.499432  | 4.367528  |
|                  | TN48_ERR037307                | 1  | 0.489901  | 0.4694728 |
|                  | TN51_ERR037308                | 1  | 0.5536002 | 0.5536002 |
|                  | TN57_ERR037309                | 7  | 5.119279  | 4.545407  |
|                  | TN72_ERR037312                | 0  | 3.38E-25  | 0         |
|                  | TN76_ERR037311                | 0  | 1.90E-23  | 0         |
|                  | TN77_ERR037310                | 14 | 5.690272  | 5.599833  |
|                  | TN85_ERR037315                | 5  | 2.252556  | 2.252556  |
|                  | TN88_ERR037313                | 0  | 3.34E-24  | 0         |
|                  | TN90_ERR037316                | 13 | 5.876938  | 5.876938  |
|                  | Tapidor_ERR037334             | 0  | 9.37E-25  | 0         |
| BnaC01g08040.1D2 | Darmor_AUP_AOSW_2_D09BTACXX.I | 0  | 0         | 0         |

|  |                               |   |            |            |
|--|-------------------------------|---|------------|------------|
|  | Darmor_AUP_BOSW_3_D09BTACXX.I | 0 | 0          | 0          |
|  | Darmor_AUP_DOSW_2_D09BTACXX.I | 0 | 1.10E-35   | 0          |
|  | Darmor_AUP_FOSW_4_D09BTACXX.I | 0 | 0          | 0          |
|  | Darmor_AUP_HOSW_5_D09BTACXX.I | 3 | 0.4381303  | 0.4381303  |
|  | Darmor_AUP_IAOSW_1_1_C0UW4A   | 0 | 0          | 0          |
|  | Darmor_AUP_KAOSW_2_1_C0UW4A   | 0 | 0          | 0          |
|  | Darmor_AUP_LAOSW_3_1_C0UW4A   | 0 | 0          | 0          |
|  | Darmor_AUP_MAOSW_4_1_C0UW4A   | 0 | 0          | 0          |
|  | Darmor_AUP_NAOSW_5_1_C0UW4A   | 0 | 0          | 0          |
|  | Darmor_AUP_PAOSW_6_1_C0UW4A   | 0 | 0          | 0          |
|  | Ningyou_ERR037335             | 1 | 0.1113681  | 0.1113675  |
|  | TN04_ERR037297                | 0 | 0          | 0          |
|  | TN05_ERR037298                | 3 | 0.30046    | 0.2700546  |
|  | TN08_ERR037301                | 0 | 3.34E-29   | 0          |
|  | TN103_ERR037317               | 0 | 1.92E-21   | 0          |
|  | TN108_ERR037318               | 0 | 1.18E-25   | 0          |
|  | TN109_ERR037319               | 6 | 0.6667627  | 0.6575873  |
|  | TN10_ERR037294                | 1 | 0.08013128 | 0.08013126 |
|  | TN121_ERR037320               | 0 | 4.88E-09   | 4.88E-09   |
|  | TN124_ERR037321               | 4 | 0.3438116  | 0.325762   |
|  | TN126_ERR037322               | 1 | 0.2001569  | 0          |
|  | TN128_ERR037323               | 1 | 0.215726   | 0.1615087  |
|  | TN129_ERR037324               | 1 | 1.140965   | 1.140965   |
|  | TN12_ERR037302                | 0 | 1.96E-40   | 0          |
|  | TN138_ERR037325               | 1 | 0.1184064  | 0.1010027  |
|  | TN149_ERR037326               | 1 | 0.1697238  | 0          |
|  | TN161_ERR037327               | 0 | 2.89E-13   | 0          |
|  | TN163_ERR037328               | 0 | 6.39E-32   | 0          |
|  | TN170_ERR037329               | 2 | 0.8733552  | 0          |
|  | TN171_ERR037332               | 0 | 0          | 0          |
|  | TN172_ERR037333               | 0 | 0          | 0          |
|  | TN176_ERR037330               | 3 | 0.4715789  | 0.3873104  |
|  | TN177_ERR037331               | 7 | 0.6206517  | 0.3804154  |

|                  |                               |     |            |            |
|------------------|-------------------------------|-----|------------|------------|
|                  | TN24_ERR037299                | 0   | 8.07E-10   | 8.07E-10   |
|                  | TN28_ERR037295                | 0   | 1.72E-18   | 0          |
|                  | TN30_ERR037305                | 2   | 0.18326    | 0.183136   |
|                  | TN31_ERR037303                | 0   | 0          | 0          |
|                  | TN38_ERR037304                | 1   | 1.195702   | 1.195702   |
|                  | TN44_ERR037306                | 0   | 9.72E-61   | 0          |
|                  | TN48_ERR037307                | 0   | 0          | 0          |
|                  | TN51_ERR037308                | 0   | 0          | 0          |
|                  | TN57_ERR037309                | 1   | 0.08587175 | 0.08558714 |
|                  | TN72_ERR037312                | 1   | 0.1062855  | 0.1056346  |
|                  | TN76_ERR037311                | 1   | 0.09729641 | 0.09411323 |
|                  | TN77_ERR037310                | 0   | 2.77E-56   | 0          |
|                  | TN85_ERR037315                | 1   | 0.1102883  | 0.1102883  |
|                  | TN88_ERR037313                | 0   | 3.29E-30   | 0          |
|                  | TN90_ERR037316                | 0   | 1.17E-48   | 0          |
|                  | Tapidor_ERR037334             | 0   | 2.01E-38   | 0          |
| BnaA03g42070.1D2 | Darmor_AUP_AOSW_2_D09BTACXX.I | 310 | 13.87459   | 11.71318   |
|                  | Darmor_AUP_BOSW_3_D09BTACXX.I | 366 | 23.13998   | 20.55571   |
|                  | Darmor_AUP_DOSW_2_D09BTACXX.I | 226 | 10.92221   | 9.257408   |
|                  | Darmor_AUP_FOSW_4_D09BTACXX.I | 282 | 14.92563   | 12.57737   |
|                  | Darmor_AUP_HOSW_5_D09BTACXX.I | 138 | 8.44345    | 6.761217   |
|                  | Darmor_AUP_IAOSW_1_1_C0UW4A   | 202 | 3.929923   | 3.562807   |
|                  | Darmor_AUP_KAOSW_2_1_C0UW4A   | 326 | 6.180646   | 5.32504    |
|                  | Darmor_AUP_LAOSW_3_1_C0UW4A   | 424 | 7.852005   | 6.983477   |
|                  | Darmor_AUP_MAOSW_4_1_C0UW4A   | 406 | 6.859899   | 6.085336   |
|                  | Darmor_AUP_NAOSW_5_1_C0UW4A   | 424 | 8.853794   | 7.654532   |
|                  | Darmor_AUP_PAOSW_6_1_C0UW4A   | 236 | 3.700042   | 3.000234   |
|                  | Ningyou_ERR037335             | 6   | 1.542157   | 0.5105437  |
|                  | TN04_ERR037297                | 5   | 0.2782949  | 0          |
|                  | TN05_ERR037298                | 12  | 0.8550619  | 0.4226473  |
|                  | TN08_ERR037301                | 11  | 1.040885   | 0.2822341  |
|                  | TN103_ERR037317               | 5   | 1.188783   | 0.06339425 |
|                  | TN108_ERR037318               | 6   | 0.6209235  | 0          |

|  |                   |    |           |           |
|--|-------------------|----|-----------|-----------|
|  | TN109_ERR037319   | 9  | 0.5970869 | 0.1033009 |
|  | TN10_ERR037294    | 0  | 1.14E-13  | 0         |
|  | TN121_ERR037320   | 0  | 3.50E-25  | 0         |
|  | TN124_ERR037321   | 0  | 6.56E-15  | 0         |
|  | TN126_ERR037322   | 14 | 0.6896191 | 0.2663024 |
|  | TN128_ERR037323   | 15 | 1.181841  | 0.7759513 |
|  | TN129_ERR037324   | 0  | 7.93E-26  | 0         |
|  | TN12_ERR037302    | 10 | 1.074137  | 0.1276415 |
|  | TN138_ERR037325   | 0  | 1.67E-20  | 0         |
|  | TN149_ERR037326   | 7  | 0.623453  | 0.5813006 |
|  | TN161_ERR037327   | 0  | 1.41E-22  | 0         |
|  | TN163_ERR037328   | 0  | 2.53E-28  | 0         |
|  | TN170_ERR037329   | 0  | 3.67E-17  | 0         |
|  | TN171_ERR037332   | 10 | 0.5059801 | 0.3062754 |
|  | TN172_ERR037333   | 0  | 4.71E-18  | 0         |
|  | TN176_ERR037330   | 18 | 1.308941  | 0.5674336 |
|  | TN177_ERR037331   | 13 | 0.6239321 | 0.4508933 |
|  | TN24_ERR037299    | 0  | 3.72E-19  | 0         |
|  | TN28_ERR037295    | 0  | 9.25E-20  | 0         |
|  | TN30_ERR037305    | 9  | 0.4689576 | 0.282121  |
|  | TN31_ERR037303    | 0  | 4.93E-25  | 0         |
|  | TN38_ERR037304    | 8  | 1.534364  | 0.6122646 |
|  | TN44_ERR037306    | 10 | 0.7199252 | 0.3576413 |
|  | TN48_ERR037307    | 0  | 1.20E-21  | 0         |
|  | TN51_ERR037308    | 4  | 0.6593488 | 0         |
|  | TN57_ERR037309    | 14 | 0.6521228 | 0.1295273 |
|  | TN72_ERR037312    | 0  | 4.72E-16  | 0         |
|  | TN76_ERR037311    | 11 | 0.9682338 | 0.4422818 |
|  | TN77_ERR037310    | 10 | 0.68498   | 0.1078537 |
|  | TN85_ERR037315    | 6  | 0.3252517 | 0         |
|  | TN88_ERR037313    | 0  | 8.28E-27  | 0         |
|  | TN90_ERR037316    | 9  | 0.440333  | 0         |
|  | Tapidor_ERR037334 | 0  | 1.01E-30  | 0         |



|                  |                               |      |          |          |
|------------------|-------------------------------|------|----------|----------|
| BnaC02g03200.1D2 | Darmor_AUP_AOSW_2_D09BTACXX.I | 323  | 24.14863 | 20.52673 |
|                  | Darmor_AUP_BOSW_3_D09BTACXX.I | 164  | 16.35564 | 12.901   |
|                  | Darmor_AUP_DOSW_2_D09BTACXX.I | 544  | 40.7054  | 36.46555 |
|                  | Darmor_AUP_FOSW_4_D09BTACXX.I | 153  | 13.31051 | 10.06681 |
|                  | Darmor_AUP_HOSW_5_D09BTACXX.I | 249  | 27.7455  | 23.21506 |
|                  | Darmor_AUP_IAOSW_1_1_COUW4A   | 1638 | 29.6437  | 27.77685 |
|                  | Darmor_AUP_KAOSW_2_1_COUW4A   | 1463 | 30.54292 | 28.72001 |
|                  | Darmor_AUP_LAOSW_3_1_COUW4A   | 712  | 15.85615 | 14.22919 |
|                  | Darmor_AUP_MAOSW_4_1_COUW4A   | 733  | 16.17898 | 14.74827 |
|                  | Darmor_AUP_NAOSW_5_1_COUW4A   | 678  | 15.09623 | 13.75889 |
|                  | Darmor_AUP_PAOSW_6_1_COUW4A   | 1722 | 37.07507 | 34.84773 |
|                  | Ningyou_ERR037335             | 76   | 15.33019 | 10.43524 |
|                  | TN04_ERR037297                | 62   | 8.52559  | 5.508439 |
|                  | TN05_ERR037298                | 116  | 12.58993 | 9.41402  |
|                  | TN08_ERR037301                | 29   | 7.960532 | 4.406987 |
|                  | TN103_ERR037317               | 103  | 16.1324  | 12.69225 |
|                  | TN108_ERR037318               | 95   | 15.79788 | 11.5149  |
|                  | TN109_ERR037319               | 69   | 10.47502 | 7.527378 |
|                  | TN10_ERR037294                | 94   | 10.46656 | 7.353844 |
|                  | TN121_ERR037320               | 59   | 6.992492 | 4.752434 |
|                  | TN124_ERR037321               | 60   | 6.298082 | 4.200151 |
|                  | TN126_ERR037322               | 99   | 10.68298 | 8.542374 |
|                  | TN128_ERR037323               | 0    | 1.35E-14 | 0        |
|                  | TN129_ERR037324               | 97   | 9.192431 | 6.545536 |
|                  | TN12_ERR037302                | 43   | 7.445472 | 4.896508 |
|                  | TN138_ERR037325               | 77   | 11.1499  | 7.857327 |
|                  | TN149_ERR037326               | 41   | 6.45427  | 3.233866 |
|                  | TN161_ERR037327               | 40   | 7.361845 | 4.551002 |
|                  | TN163_ERR037328               | 127  | 10.59149 | 8.447711 |
|                  | TN170_ERR037329               | 148  | 18.57282 | 14.5982  |
|                  | TN171_ERR037332               | 0    | 3.13E-20 | 0        |
|                  | TN172_ERR037333               | 118  | 14.11081 | 10.84282 |
|                  | TN176_ERR037330               | 108  | 11.5324  | 8.922754 |

|                  |                               |      |           |           |
|------------------|-------------------------------|------|-----------|-----------|
|                  | TN177_ERR037331               | 26   | 4.750847  | 2.652853  |
|                  | TN24_ERR037299                | 0    | 4.44E-20  | 0         |
|                  | TN28_ERR037295                | 100  | 16.85638  | 12.59386  |
|                  | TN30_ERR037305                | 79   | 9.865137  | 7.129221  |
|                  | TN31_ERR037303                | 49   | 9.379128  | 6.544448  |
|                  | TN38_ERR037304                | 112  | 19.14346  | 14.65802  |
|                  | TN44_ERR037306                | 41   | 8.623459  | 4.928675  |
|                  | TN48_ERR037307                | 55   | 9.118292  | 6.646232  |
|                  | TN51_ERR037308                | 85   | 14.47633  | 10.16158  |
|                  | TN57_ERR037309                | 33   | 5.143542  | 2.428486  |
|                  | TN72_ERR037312                | 35   | 7.188748  | 3.453858  |
|                  | TN76_ERR037311                | 72   | 9.855454  | 6.958088  |
|                  | TN77_ERR037310                | 0    | 6.50E-21  | 0         |
|                  | TN85_ERR037315                | 62   | 9.937851  | 6.721087  |
|                  | TN88_ERR037313                | 0    | 4.63E-21  | 0         |
|                  | TN90_ERR037316                | 58   | 5.965953  | 3.561145  |
|                  | Tapidor_ERR037334             | 0    | 1.41E-15  | 0         |
| BnaC02g13740.1D2 | Darmor_AUP_AOSW_2_D09BTACXX.I | 252  | 16.91874  | 14.03182  |
|                  | Darmor_AUP_BOSW_3_D09BTACXX.I | 309  | 21.72115  | 18.62933  |
|                  | Darmor_AUP_DOSW_2_D09BTACXX.I | 129  | 6.420304  | 5.045753  |
|                  | Darmor_AUP_FOSW_4_D09BTACXX.I | 129  | 10.97683  | 8.634688  |
|                  | Darmor_AUP_HOSW_5_D09BTACXX.I | 138  | 13.13334  | 10.25376  |
|                  | Darmor_AUP_IAOSW_1_1_C0UW4A   | 888  | 14.43097  | 13.24966  |
|                  | Darmor_AUP_KAOSW_2_1_C0UW4A   | 836  | 13.38694  | 12.27939  |
|                  | Darmor_AUP_LAOSW_3_1_C0UW4A   | 801  | 13.51669  | 12.32356  |
|                  | Darmor_AUP_MAOSW_4_1_C0UW4A   | 746  | 12.41556  | 11.17894  |
|                  | Darmor_AUP_NAOSW_5_1_C0UW4A   | 952  | 14.12142  | 12.89728  |
|                  | Darmor_AUP_PAOSW_6_1_C0UW4A   | 1012 | 14.98499  | 13.70597  |
|                  | Ningyou_ERR037335             | 1    | 0.2674448 | 0.1208042 |
|                  | TN04_ERR037297                | 0    | 3.83E-14  | 0         |
|                  | TN05_ERR037298                | 0    | 3.07E-19  | 0         |
|                  | TN08_ERR037301                | 0    | 6.41E-19  | 0         |
|                  | TN103_ERR037317               | 0    | 6.59E-17  | 0         |

|  |                 |   |          |            |
|--|-----------------|---|----------|------------|
|  | TN108_ERR037318 | 0 | 2.27E-14 | 0          |
|  | TN109_ERR037319 | 0 | 5.10E-16 | 0          |
|  | TN10_ERR037294  | 0 | 7.90E-17 | 0          |
|  | TN121_ERR037320 | 0 | 2.91E-17 | 0          |
|  | TN124_ERR037321 | 0 | 1.94E-18 | 0          |
|  | TN126_ERR037322 | 0 | 7.95E-18 | 0          |
|  | TN128_ERR037323 | 0 | 1.61E-21 | 0          |
|  | TN129_ERR037324 | 0 | 1.13E-21 | 0          |
|  | TN12_ERR037302  | 0 | 6.34E-19 | 0          |
|  | TN138_ERR037325 | 0 | 4.81E-17 | 0          |
|  | TN149_ERR037326 | 0 | 1.11E-22 | 0          |
|  | TN161_ERR037327 | 0 | 2.60E-18 | 0          |
|  | TN163_ERR037328 | 0 | 9.74E-19 | 0          |
|  | TN170_ERR037329 | 3 | 0.121903 | 0.06763571 |
|  | TN171_ERR037332 | 0 | 5.74E-24 | 0          |
|  | TN172_ERR037333 | 0 | 2.54E-17 | 0          |
|  | TN176_ERR037330 | 0 | 9.64E-19 | 0          |
|  | TN177_ERR037331 | 0 | 6.13E-19 | 0          |
|  | TN24_ERR037299  | 0 | 9.78E-23 | 0          |
|  | TN28_ERR037295  | 0 | 5.27E-17 | 0          |
|  | TN30_ERR037305  | 0 | 3.82E-17 | 0          |
|  | TN31_ERR037303  | 0 | 7.93E-17 | 0          |
|  | TN38_ERR037304  | 0 | 2.19E-22 | 0          |
|  | TN44_ERR037306  | 0 | 1.75E-16 | 0          |
|  | TN48_ERR037307  | 0 | 2.33E-19 | 0          |
|  | TN51_ERR037308  | 0 | 1.74E-19 | 0          |
|  | TN57_ERR037309  | 0 | 2.86E-19 | 0          |
|  | TN72_ERR037312  | 0 | 3.96E-09 | 0          |
|  | TN76_ERR037311  | 0 | 4.29E-22 | 0          |
|  | TN77_ERR037310  | 0 | 2.93E-18 | 0          |
|  | TN85_ERR037315  | 0 | 3.11E-08 | 2.83E-08   |
|  | TN88_ERR037313  | 0 | 1.42E-12 | 0          |
|  | TN90_ERR037316  | 0 | 2.61E-20 | 0          |

|                  |                               |    |             |              |
|------------------|-------------------------------|----|-------------|--------------|
|                  | Tapidor_ERR037334             | 0  | 1.49E-19    | 0            |
| BnaC06g05080.1D2 | Darmor_AUP_AOSW_2_D09BTACXX.I | 1  | 0.000345785 | 0.0003457742 |
|                  | Darmor_AUP_BOSW_3_D09BTACXX.I | 3  | 0.00208274  | 0.0006677359 |
|                  | Darmor_AUP_DOSW_2_D09BTACXX.I | 2  | 0.000648952 | 0.0006481304 |
|                  | Darmor_AUP_FOSW_4_D09BTACXX.I | 2  | 0.000914822 | 0.0003874085 |
|                  | Darmor_AUP_HOSW_5_D09BTACXX.I | 1  | 0.000490416 | 0.0004893207 |
|                  | Darmor_AUP_IAOSW_1_1_C0UW4A   | 0  | 2.86E-64    | 0            |
|                  | Darmor_AUP_KAOSW_2_1_C0UW4A   | 0  | 2.82E-08    | 0            |
|                  | Darmor_AUP_LAOSW_3_1_C0UW4A   | 0  | 1.96E-41    | 0            |
|                  | Darmor_AUP_MAOSW_4_1_C0UW4A   | 0  | 0           | 0            |
|                  | Darmor_AUP_NAOSW_5_1_C0UW4A   | 1  | 0.000132714 | 0            |
|                  | Darmor_AUP_PAOSW_6_1_C0UW4A   | 0  | 0           | 0            |
|                  | Ningyou_ERR037335             | 10 | 0.05766524  | 0.02851848   |
|                  | TN04_ERR037297                | 4  | 0.05394427  | 0.02667205   |
|                  | TN05_ERR037298                | 12 | 0.07743179  | 0.04392825   |
|                  | TN08_ERR037301                | 4  | 0.02338103  | 0.008835847  |
|                  | TN103_ERR037317               | 9  | 0.3208019   | 0.2503663    |
|                  | TN108_ERR037318               | 8  | 0.07264686  | 0.04148435   |
|                  | TN109_ERR037319               | 4  | 0.1514413   | 0.1026751    |
|                  | TN10_ERR037294                | 3  | 0.01493499  | 0.006912727  |
|                  | TN121_ERR037320               | 9  | 0.07299799  | 0.04148061   |
|                  | TN124_ERR037321               | 7  | 0.07154303  | 0.03731354   |
|                  | TN126_ERR037322               | 10 | 0.05895706  | 0.02746995   |
|                  | TN128_ERR037323               | 3  | 0.06032942  | 0.03291277   |
|                  | TN129_ERR037324               | 5  | 0.06220022  | 0.03315986   |
|                  | TN12_ERR037302                | 4  | 0.02105141  | 0.003016851  |
|                  | TN138_ERR037325               | 10 | 0.1771083   | 0.1293999    |
|                  | TN149_ERR037326               | 10 | 0.2196868   | 0.1714384    |
|                  | TN161_ERR037327               | 3  | 0.0243011   | 0.009056532  |
|                  | TN163_ERR037328               | 3  | 0.03461063  | 0.01534717   |
|                  | TN170_ERR037329               | 4  | 0.02739493  | 0.007777531  |
|                  | TN171_ERR037332               | 1  | 0.02870705  | 0.008531969  |
|                  | TN172_ERR037333               | 8  | 0.03272611  | 0.01633661   |

|                  |                               |     |            |              |
|------------------|-------------------------------|-----|------------|--------------|
|                  | TN176_ERR037330               | 5   | 0.03468817 | 0.01780936   |
|                  | TN177_ERR037331               | 4   | 0.03290566 | 0.009968383  |
|                  | TN24_ERR037299                | 3   | 0.06501955 | 0.02767358   |
|                  | TN28_ERR037295                | 8   | 0.06098946 | 0.03151956   |
|                  | TN30_ERR037305                | 3   | 0.02255487 | 0.001675346  |
|                  | TN31_ERR037303                | 5   | 0.04650896 | 0.01669218   |
|                  | TN38_ERR037304                | 5   | 0.03794925 | 0.001021299  |
|                  | TN44_ERR037306                | 1   | 0.0190912  | 0.0004265702 |
|                  | TN48_ERR037307                | 4   | 0.01530031 | 0.004731807  |
|                  | TN51_ERR037308                | 4   | 0.01742397 | 0.001161842  |
|                  | TN57_ERR037309                | 4   | 0.05941219 | 0.03125724   |
|                  | TN72_ERR037312                | 2   | 0.08842362 | 0.05054254   |
|                  | TN76_ERR037311                | 5   | 0.03685848 | 0.01200453   |
|                  | TN77_ERR037310                | 7   | 0.07734435 | 0.04252457   |
|                  | TN85_ERR037315                | 1   | 0.06446031 | 0.03381408   |
|                  | TN88_ERR037313                | 14  | 0.07809491 | 0.0449852    |
|                  | TN90_ERR037316                | 3   | 0.06251411 | 0.03489153   |
|                  | Tapidor_ERR037334             | 2   | 0.09488558 | 0.04988895   |
| BnaC06g26930.1D2 | Darmor_AUP_AOSW_2_D09BTACXX.I | 42  | 6.024166   | 6.024166     |
|                  | Darmor_AUP_BOSW_3_D09BTACXX.I | 109 | 22.2436    | 22.2426      |
|                  | Darmor_AUP_DOSW_2_D09BTACXX.I | 87  | 11.54222   | 11.54222     |
|                  | Darmor_AUP_FOSW_4_D09BTACXX.I | 3   | 0.6323044  | 0.6322505    |
|                  | Darmor_AUP_HOSW_5_D09BTACXX.I | 23  | 4.521988   | 4.521885     |
|                  | Darmor_AUP_IAOSW_1_1_C0UW4A   | 94  | 6.067059   | 6.067059     |
|                  | Darmor_AUP_KAOSW_2_1_C0UW4A   | 68  | 4.380098   | 4.380098     |
|                  | Darmor_AUP_LAOSW_3_1_C0UW4A   | 7   | 0.4577862  | 0.4577862    |
|                  | Darmor_AUP_MAOSW_4_1_C0UW4A   | 9   | 0.5933954  | 0.5933954    |
|                  | Darmor_AUP_NAOSW_5_1_C0UW4A   | 11  | 0.7369776  | 0.7369776    |
|                  | Darmor_AUP_PAOSW_6_1_C0UW4A   | 83  | 5.540932   | 5.540932     |
|                  | Ningyou_ERR037335             | 5   | 1.083126   | 1.082778     |
|                  | TN04_ERR037297                | 2   | 0.4248272  | 0.424823     |
|                  | TN05_ERR037298                | 17  | 3.51827    | 3.51769      |
|                  | TN08_ERR037301                | 5   | 2.12712    | 2.127066     |

|  |                 |    |           |           |
|--|-----------------|----|-----------|-----------|
|  | TN103_ERR037317 | 8  | 2.005604  | 0.9322722 |
|  | TN108_ERR037318 | 0  | 3.75E-33  | 0         |
|  | TN109_ERR037319 | 20 | 4.241553  | 4.241553  |
|  | TN10_ERR037294  | 3  | 0.5737995 | 0.563137  |
|  | TN121_ERR037320 | 1  | 0.2063388 | 0.2062831 |
|  | TN124_ERR037321 | 11 | 1.819175  | 1.819128  |
|  | TN126_ERR037322 | 7  | 1.202328  | 1.19887   |
|  | TN128_ERR037323 | 1  | 1.126866  | 0         |
|  | TN129_ERR037324 | 20 | 4.293755  | 4.14577   |
|  | TN12_ERR037302  | 14 | 3.173064  | 3.172969  |
|  | TN138_ERR037325 | 7  | 1.580075  | 1.580019  |
|  | TN149_ERR037326 | 3  | 0.7562615 | 0.7554718 |
|  | TN161_ERR037327 | 2  | 0.4879369 | 0.4879015 |
|  | TN163_ERR037328 | 12 | 3.273012  | 3.272674  |
|  | TN170_ERR037329 | 2  | 0.3351736 | 0.3351736 |
|  | TN171_ERR037332 | 7  | 1.144469  | 1.144462  |
|  | TN172_ERR037333 | 6  | 1.84679   | 1.843674  |
|  | TN176_ERR037330 | 0  | 4.00E-42  | 0         |
|  | TN177_ERR037331 | 0  | 2.73E-26  | 0         |
|  | TN24_ERR037299  | 0  | 1.83E-31  | 0         |
|  | TN28_ERR037295  | 1  | 0.1753931 | 0.175071  |
|  | TN30_ERR037305  | 1  | 0.2022565 | 0.2022169 |
|  | TN31_ERR037303  | 0  | 1.16E-31  | 0         |
|  | TN38_ERR037304  | 16 | 5.123665  | 5.121632  |
|  | TN44_ERR037306  | 4  | 2.284985  | 2.284884  |
|  | TN48_ERR037307  | 8  | 1.725869  | 1.72586   |
|  | TN51_ERR037308  | 3  | 0.7648061 | 0.7648046 |
|  | TN57_ERR037309  | 8  | 2.198483  | 2.197277  |
|  | TN72_ERR037312  | 0  | 1.72E-27  | 0         |
|  | TN76_ERR037311  | 7  | 1.435401  | 1.407453  |
|  | TN77_ERR037310  | 11 | 2.064091  | 2.063978  |
|  | TN85_ERR037315  | 11 | 2.971532  | 2.971285  |
|  | TN88_ERR037313  | 10 | 1.835652  | 1.833041  |

|                  |                               |   |            |   |
|------------------|-------------------------------|---|------------|---|
|                  | TN90_ERR037316                | 6 | 2.043509   | 0 |
|                  | Tapidor_ERR037334             | 0 | 1.38E-31   | 0 |
| BnaC06g28350.1D2 | Darmor_AUP_AOSW_2_D09BTACXX.I | 0 | 0.04500933 | 0 |
|                  | Darmor_AUP_BOSW_3_D09BTACXX.I | 0 | 1.66E-34   | 0 |
|                  | Darmor_AUP_DOSW_2_D09BTACXX.I | 0 | 5.71E-38   | 0 |
|                  | Darmor_AUP_FOSW_4_D09BTACXX.I | 0 | 0          | 0 |
|                  | Darmor_AUP_HOSW_5_D09BTACXX.I | 0 | 0          | 0 |
|                  | Darmor_AUP_IAOSW_1_1_COUW4A   | 0 | 0          | 0 |
|                  | Darmor_AUP_KAOSW_2_1_COUW4A   | 0 | 0          | 0 |
|                  | Darmor_AUP_LAOSW_3_1_COUW4A   | 0 | 0          | 0 |
|                  | Darmor_AUP_MAOSW_4_1_COUW4A   | 0 | 0          | 0 |
|                  | Darmor_AUP_NAOSW_5_1_COUW4A   | 0 | 0          | 0 |
|                  | Darmor_AUP_PAOSW_6_1_COUW4A   | 0 | 0.03281187 | 0 |
|                  | Ningyou_ERR037335             | 0 | 0          | 0 |
|                  | TN04_ERR037297                | 0 | 0          | 0 |
|                  | TN05_ERR037298                | 0 | 0          | 0 |
|                  | TN08_ERR037301                | 0 | 0          | 0 |
|                  | TN103_ERR037317               | 0 | 0          | 0 |
|                  | TN108_ERR037318               | 0 | 0          | 0 |
|                  | TN109_ERR037319               | 0 | 0          | 0 |
|                  | TN10_ERR037294                | 0 | 0          | 0 |
|                  | TN121_ERR037320               | 0 | 0          | 0 |
|                  | TN124_ERR037321               | 0 | 0          | 0 |
|                  | TN126_ERR037322               | 0 | 0          | 0 |
|                  | TN128_ERR037323               | 0 | 0          | 0 |
|                  | TN129_ERR037324               | 0 | 0          | 0 |
|                  | TN12_ERR037302                | 0 | 0          | 0 |
|                  | TN138_ERR037325               | 0 | 0          | 0 |
|                  | TN149_ERR037326               | 0 | 0          | 0 |
|                  | TN161_ERR037327               | 0 | 0          | 0 |
|                  | TN163_ERR037328               | 0 | 0          | 0 |
|                  | TN170_ERR037329               | 0 | 0          | 0 |
|                  | TN171_ERR037332               | 0 | 0          | 0 |

|                  |                               |      |           |           |
|------------------|-------------------------------|------|-----------|-----------|
|                  | TN172_ERR037333               | 0    | 0         | 0         |
|                  | TN176_ERR037330               | 0    | 0         | 0         |
|                  | TN177_ERR037331               | 0    | 8.86E-36  | 0         |
|                  | TN24_ERR037299                | 0    | 2.35E-31  | 0         |
|                  | TN28_ERR037295                | 0    | 2.91E-37  | 0         |
|                  | TN30_ERR037305                | 0    | 2.85E-64  | 0         |
|                  | TN31_ERR037303                | 0    | 0         | 0         |
|                  | TN38_ERR037304                | 0    | 0         | 0         |
|                  | TN44_ERR037306                | 0    | 0         | 0         |
|                  | TN48_ERR037307                | 0    | 0         | 0         |
|                  | TN51_ERR037308                | 0    | 0         | 0         |
|                  | TN57_ERR037309                | 0    | 0         | 0         |
|                  | TN72_ERR037312                | 0    | 1.39E-41  | 0         |
|                  | TN76_ERR037311                | 0    | 0         | 0         |
|                  | TN77_ERR037310                | 0    | 0         | 0         |
|                  | TN85_ERR037315                | 0    | 1.93E-29  | 0         |
|                  | TN88_ERR037313                | 0    | 0         | 0         |
|                  | TN90_ERR037316                | 0    | 1.46E-41  | 0         |
|                  | Tapidor_ERR037334             | 0    | 0         | 0         |
| BnaC05g35430.1D2 | Darmor_AUP_AOSW_2_D09BTACXX.I | 696  | 28.44548  | 26.56889  |
|                  | Darmor_AUP_BOSW_3_D09BTACXX.I | 882  | 47.86123  | 44.5571   |
|                  | Darmor_AUP_DOSW_2_D09BTACXX.I | 1456 | 60.21445  | 57.39945  |
|                  | Darmor_AUP_FOSW_4_D09BTACXX.I | 73   | 3.691202  | 2.970711  |
|                  | Darmor_AUP_HOSW_5_D09BTACXX.I | 283  | 15.1004   | 13.74436  |
|                  | Darmor_AUP_IAOSW_1_1_C0UW4A   | 505  | 9.726243  | 9.008621  |
|                  | Darmor_AUP_KAOSW_2_1_C0UW4A   | 1224 | 22.11923  | 21.10917  |
|                  | Darmor_AUP_LAOSW_3_1_C0UW4A   | 107  | 1.820047  | 1.812142  |
|                  | Darmor_AUP_MAOSW_4_1_C0UW4A   | 118  | 2.282086  | 1.994518  |
|                  | Darmor_AUP_NAOSW_5_1_C0UW4A   | 80   | 1.651003  | 1.616664  |
|                  | Darmor_AUP_PAOSW_6_1_C0UW4A   | 857  | 17.36716  | 16.30616  |
|                  | Ningyou_ERR037335             | 3    | 0.7951011 | 0         |
|                  | TN04_ERR037297                | 6    | 0.4312184 | 0.4289586 |
|                  | TN05_ERR037298                | 2    | 0.1073312 | 0.1052145 |



|  |                 |   |             |             |
|--|-----------------|---|-------------|-------------|
|  | TN08_ERR037301  | 0 | 7.16E-28    | 0           |
|  | TN103_ERR037317 | 3 | 0.9713712   | 0.7643937   |
|  | TN108_ERR037318 | 1 | 0.1429599   | 0.1426652   |
|  | TN109_ERR037319 | 3 | 0.1802208   | 0.118148    |
|  | TN10_ERR037294  | 0 | 1.25E-09    | 0           |
|  | TN121_ERR037320 | 4 | 0.2284057   | 0.2275254   |
|  | TN124_ERR037321 | 7 | 1.083923    | 0.6795503   |
|  | TN126_ERR037322 | 5 | 1.530452    | 0.5200178   |
|  | TN128_ERR037323 | 9 | 0.6165052   | 0.004434458 |
|  | TN129_ERR037324 | 0 | 1.50E-18    | 0           |
|  | TN12_ERR037302  | 0 | 1.54E-06    | 0           |
|  | TN138_ERR037325 | 0 | 7.11E-19    | 0           |
|  | TN149_ERR037326 | 0 | 1.02E-28    | 0           |
|  | TN161_ERR037327 | 2 | 0.5895564   | 0           |
|  | TN163_ERR037328 | 0 | 0.001126373 | 0           |
|  | TN170_ERR037329 | 1 | 0.0501126   | 0.04805736  |
|  | TN171_ERR037332 | 0 | 1.77E-18    | 0           |
|  | TN172_ERR037333 | 1 | 0.05012709  | 0.03161499  |
|  | TN176_ERR037330 | 1 | 0.1874673   | 0.01564573  |
|  | TN177_ERR037331 | 0 | 3.99E-27    | 0           |
|  | TN24_ERR037299  | 0 | 5.56E-25    | 0           |
|  | TN28_ERR037295  | 7 | 0.3981557   | 0           |
|  | TN30_ERR037305  | 2 | 0.241498    | 0.160437    |
|  | TN31_ERR037303  | 3 | 0.2471678   | 0.1360583   |
|  | TN38_ERR037304  | 7 | 0.7480327   | 0.01130695  |
|  | TN44_ERR037306  | 4 | 1.318078    | 0.6597666   |
|  | TN48_ERR037307  | 4 | 0.5376092   | 0           |
|  | TN51_ERR037308  | 1 | 0.1094335   | 0           |
|  | TN57_ERR037309  | 3 | 0.1465897   | 0.006011368 |
|  | TN72_ERR037312  | 0 | 7.67E-24    | 0           |
|  | TN76_ERR037311  | 4 | 0.2188372   | 0.04896593  |
|  | TN77_ERR037310  | 0 | 1.79E-22    | 0           |
|  | TN85_ERR037315  | 0 | 5.09E-28    | 0           |

|                  |                               |    |            |            |
|------------------|-------------------------------|----|------------|------------|
|                  | TN88_ERR037313                | 1  | 0.051126   | 0.05112441 |
|                  | TN90_ERR037316                | 3  | 0.2337521  | 0          |
|                  | Tapidor_ERR037334             | 1  | 0.05090966 | 0.05065381 |
| BnaU01g13590.1D2 | Darmor_AUP_AOSW_2_D09BTACXX.I | 2  | 0.08754792 | 0.08754792 |
|                  | Darmor_AUP_BOSW_3_D09BTACXX.I | 5  | 0.3048815  | 0.3012093  |
|                  | Darmor_AUP_DOSW_2_D09BTACXX.I | 0  | 0          | 0          |
|                  | Darmor_AUP_FOSW_4_D09BTACXX.I | 0  | 0          | 0          |
|                  | Darmor_AUP_HOSW_5_D09BTACXX.I | 1  | 0.06093064 | 0.06093064 |
|                  | Darmor_AUP_IAOSW_1_1_C0UW4A   | 6  | 0.1139599  | 0.1139596  |
|                  | Darmor_AUP_KAOSW_2_1_C0UW4A   | 11 | 0.2095386  | 0.2095386  |
|                  | Darmor_AUP_LAOSW_3_1_C0UW4A   | 0  | 0          | 0          |
|                  | Darmor_AUP_MAOSW_4_1_C0UW4A   | 0  | 0          | 0          |
|                  | Darmor_AUP_NAOSW_5_1_C0UW4A   | 0  | 0          | 0          |
|                  | Darmor_AUP_PAOSW_6_1_C0UW4A   | 12 | 0.2366763  | 0.2364218  |
|                  | Ningyou_ERR037335             | 0  | 5.50E-62   | 0          |
|                  | TN04_ERR037297                | 0  | 0          | 0          |
|                  | TN05_ERR037298                | 0  | 0          | 0          |
|                  | TN08_ERR037301                | 0  | 0          | 0          |
|                  | TN103_ERR037317               | 0  | 0          | 0          |
|                  | TN108_ERR037318               | 0  | 0          | 0          |
|                  | TN109_ERR037319               | 0  | 0          | 0          |
|                  | TN10_ERR037294                | 0  | 8.28E-58   | 0          |
|                  | TN121_ERR037320               | 0  | 0          | 0          |
|                  | TN124_ERR037321               | 0  | 0          | 0          |
|                  | TN126_ERR037322               | 0  | 0          | 0          |
|                  | TN128_ERR037323               | 0  | 0          | 0          |
|                  | TN129_ERR037324               | 0  | 0          | 0          |
|                  | TN12_ERR037302                | 0  | 0          | 0          |
|                  | TN138_ERR037325               | 0  | 0          | 0          |
|                  | TN149_ERR037326               | 0  | 0          | 0          |
|                  | TN161_ERR037327               | 0  | 0          | 0          |
|                  | TN163_ERR037328               | 0  | 0          | 0          |
|                  | TN170_ERR037329               | 0  | 0          | 0          |

|                  |                               |   |            |            |
|------------------|-------------------------------|---|------------|------------|
|                  | TN171_ERR037332               | 0 | 1.66E-20   | 0          |
|                  | TN172_ERR037333               | 0 | 7.43E-50   | 0          |
|                  | TN176_ERR037330               | 0 | 0          | 0          |
|                  | TN177_ERR037331               | 0 | 0          | 0          |
|                  | TN24_ERR037299                | 0 | 0          | 0          |
|                  | TN28_ERR037295                | 0 | 4.94E-56   | 0          |
|                  | TN30_ERR037305                | 0 | 1.86E-45   | 0          |
|                  | TN31_ERR037303                | 0 | 0          | 0          |
|                  | TN38_ERR037304                | 0 | 1.40E-39   | 0          |
|                  | TN44_ERR037306                | 0 | 0          | 0          |
|                  | TN48_ERR037307                | 0 | 0          | 0          |
|                  | TN51_ERR037308                | 0 | 0          | 0          |
|                  | TN57_ERR037309                | 0 | 1.63E-61   | 0          |
|                  | TN72_ERR037312                | 0 | 0          | 0          |
|                  | TN76_ERR037311                | 0 | 1.19E-06   | 0          |
|                  | TN77_ERR037310                | 0 | 0          | 0          |
|                  | TN85_ERR037315                | 0 | 0          | 0          |
|                  | TN88_ERR037313                | 0 | 1.03E-31   | 0          |
|                  | TN90_ERR037316                | 0 | 0          | 0          |
|                  | Tapidor_ERR037334             | 0 | 4.60E-38   | 0          |
| BnaC02g04850.1D2 | Darmor_AUP_AOSW_2_D09BTACXX.I | 1 | 0.02224464 | 0.02224464 |
|                  | Darmor_AUP_BOSW_3_D09BTACXX.I | 2 | 0.05971009 | 0.05970836 |
|                  | Darmor_AUP_DOSW_2_D09BTACXX.I | 0 | 2.12E-34   | 0          |
|                  | Darmor_AUP_FOSW_4_D09BTACXX.I | 0 | 0          | 0          |
|                  | Darmor_AUP_HOSW_5_D09BTACXX.I | 0 | 2.16E-15   | 0          |
|                  | Darmor_AUP_IAOSW_1_1_C0UW4A   | 3 | 0.03022559 | 0.03022559 |
|                  | Darmor_AUP_KAOSW_2_1_C0UW4A   | 1 | 0.01015246 | 0.01015246 |
|                  | Darmor_AUP_LAOSW_3_1_C0UW4A   | 0 | 0          | 0          |
|                  | Darmor_AUP_MAOSW_4_1_C0UW4A   | 0 | 0          | 0          |
|                  | Darmor_AUP_NAOSW_5_1_C0UW4A   | 0 | 0          | 0          |
|                  | Darmor_AUP_PAOSW_6_1_C0UW4A   | 0 | 0          | 0          |
|                  | Ningyou_ERR037335             | 0 | 0.2949512  | 0          |
|                  | TN04_ERR037297                | 1 | 0.03117362 | 0.03117362 |

|  |                 |   |            |            |
|--|-----------------|---|------------|------------|
|  | TN05_ERR037298  | 0 | 3.24E-46   | 0          |
|  | TN08_ERR037301  | 0 | 5.40E-23   | 0          |
|  | TN103_ERR037317 | 1 | 0.03864063 | 0.03829006 |
|  | TN108_ERR037318 | 0 | 0          | 0          |
|  | TN109_ERR037319 | 0 | 2.29E-44   | 0          |
|  | TN10_ERR037294  | 0 | 3.21E-25   | 0          |
|  | TN121_ERR037320 | 1 | 0.03258127 | 0.03258127 |
|  | TN124_ERR037321 | 0 | 0          | 0          |
|  | TN126_ERR037322 | 0 | 1.01E-56   | 0          |
|  | TN128_ERR037323 | 0 | 0          | 0          |
|  | TN129_ERR037324 | 0 | 1.55E-48   | 0          |
|  | TN12_ERR037302  | 0 | 0          | 0          |
|  | TN138_ERR037325 | 0 | 0          | 0          |
|  | TN149_ERR037326 | 0 | 0          | 0          |
|  | TN161_ERR037327 | 0 | 5.76E-08   | 0          |
|  | TN163_ERR037328 | 0 | 0          | 0          |
|  | TN170_ERR037329 | 4 | 0.1494518  | 0.1494518  |
|  | TN171_ERR037332 | 0 | 1.63E-57   | 0          |
|  | TN172_ERR037333 | 0 | 2.04E-41   | 0          |
|  | TN176_ERR037330 | 0 | 3.01E-05   | 0          |
|  | TN177_ERR037331 | 1 | 0.02971799 | 0.02971799 |
|  | TN24_ERR037299  | 0 | 6.03E-39   | 0          |
|  | TN28_ERR037295  | 0 | 4.37E-26   | 0          |
|  | TN30_ERR037305  | 0 | 3.72E-34   | 0          |
|  | TN31_ERR037303  | 0 | 0          | 0          |
|  | TN38_ERR037304  | 0 | 4.96E-54   | 0          |
|  | TN44_ERR037306  | 0 | 0          | 0          |
|  | TN48_ERR037307  | 0 | 0          | 0          |
|  | TN51_ERR037308  | 0 | 9.20E-61   | 0          |
|  | TN57_ERR037309  | 0 | 0          | 0          |
|  | TN72_ERR037312  | 0 | 5.26E-34   | 0          |
|  | TN76_ERR037311  | 1 | 0.03129742 | 0.01709218 |
|  | TN77_ERR037310  | 0 | 0          | 0          |

|                  |                               |      |             |          |
|------------------|-------------------------------|------|-------------|----------|
|                  | TN85_ERR037315                | 0    | 1.19E-59    | 0        |
|                  | TN88_ERR037313                | 0    | 4.18E-55    | 0        |
|                  | TN90_ERR037316                | 0    | 1.77E-28    | 0        |
|                  | Tapidor_ERR037334             | 0    | 1.64E-39    | 0        |
| BnaC09g11140.1D2 | Darmor_AUP_AOSW_2_D09BTACXX.I | 456  | 15.36893    | 14.14853 |
|                  | Darmor_AUP_BOSW_3_D09BTACXX.I | 970  | 40.73686    | 38.45062 |
|                  | Darmor_AUP_DOSW_2_D09BTACXX.I | 1083 | 31.07823    | 29.37522 |
|                  | Darmor_AUP_FOSW_4_D09BTACXX.I | 196  | 7.166115    | 6.392525 |
|                  | Darmor_AUP_HOSW_5_D09BTACXX.I | 454  | 21.81027    | 19.87503 |
|                  | Darmor_AUP_IAOSW_1_1_COUW4A   | 1461 | 16.34008    | 15.81885 |
|                  | Darmor_AUP_KAOSW_2_1_COUW4A   | 1429 | 16.11985    | 15.76225 |
|                  | Darmor_AUP_LAOSW_3_1_COUW4A   | 879  | 10.02931    | 9.955987 |
|                  | Darmor_AUP_MAOSW_4_1_COUW4A   | 969  | 11.095      | 10.7851  |
|                  | Darmor_AUP_NAOSW_5_1_COUW4A   | 966  | 11.30439    | 11.17537 |
|                  | Darmor_AUP_PAOSW_6_1_COUW4A   | 1680 | 19.77464    | 19.1397  |
|                  | Ningyou_ERR037335             | 128  | 10.64388    | 9.07213  |
|                  | TN04_ERR037297                | 0    | 1.21E-21    | 0        |
|                  | TN05_ERR037298                | 0    | 3.39E-11    | 0        |
|                  | TN08_ERR037301                | 1    | 0.2603327   | 0        |
|                  | TN103_ERR037317               | 180  | 13.53336    | 11.93907 |
|                  | TN108_ERR037318               | 190  | 14.45724    | 12.32403 |
|                  | TN109_ERR037319               | 301  | 21.44776    | 18.8485  |
|                  | TN10_ERR037294                | 0    | 1.05E-09    | 1.05E-09 |
|                  | TN121_ERR037320               | 232  | 14.23138    | 12.7769  |
|                  | TN124_ERR037321               | 0    | 3.43E-24    | 0        |
|                  | TN126_ERR037322               | 0    | 1.10E-26    | 0        |
|                  | TN128_ERR037323               | 258  | 16.34537    | 14.1086  |
|                  | TN129_ERR037324               | 0    | 0.01001378  | 0        |
|                  | TN12_ERR037302                | 0    | 0.006362043 | 0        |
|                  | TN138_ERR037325               | 172  | 12.94343    | 11.35981 |
|                  | TN149_ERR037326               | 0    | 9.22E-25    | 0        |
|                  | TN161_ERR037327               | 0    | 8.20E-20    | 0        |
|                  | TN163_ERR037328               | 0    | 6.68E-23    | 0        |

|                  |                               |     |            |            |
|------------------|-------------------------------|-----|------------|------------|
|                  | TN170_ERR037329               | 188 | 10.00785   | 8.171463   |
|                  | TN171_ERR037332               | 0   | 6.55E-21   | 0          |
|                  | TN172_ERR037333               | 0   | 3.22E-21   | 0          |
|                  | TN176_ERR037330               | 0   | 1.54E-26   | 0          |
|                  | TN177_ERR037331               | 187 | 9.657308   | 8.217363   |
|                  | TN24_ERR037299                | 186 | 13.41973   | 11.26439   |
|                  | TN28_ERR037295                | 288 | 15.36833   | 13.31593   |
|                  | TN30_ERR037305                | 290 | 14.82672   | 12.85695   |
|                  | TN31_ERR037303                | 0   | 3.98E-17   | 0          |
|                  | TN38_ERR037304                | 2   | 0.2194495  | 0          |
|                  | TN44_ERR037306                | 207 | 16.42605   | 14.06583   |
|                  | TN48_ERR037307                | 233 | 9.272032   | 7.495343   |
|                  | TN51_ERR037308                | 173 | 11.94083   | 9.988343   |
|                  | TN57_ERR037309                | 272 | 11.08719   | 9.628238   |
|                  | TN72_ERR037312                | 239 | 13.20341   | 11.55426   |
|                  | TN76_ERR037311                | 291 | 15.1189    | 13.4342    |
|                  | TN77_ERR037310                | 230 | 11.92207   | 10.14038   |
|                  | TN85_ERR037315                | 248 | 14.37229   | 12.10589   |
|                  | TN88_ERR037313                | 266 | 13.4337    | 11.78654   |
|                  | TN90_ERR037316                | 1   | 0.04156247 | 0.03118858 |
|                  | Tapidor_ERR037334             | 2   | 0.0936087  | 0.09253533 |
| BnaA03g42850.1D2 | Darmor_AUP_AOSW_2_D09BTACXX.I | 0   | 0          | 0          |
|                  | Darmor_AUP_BOSW_3_D09BTACXX.I | 0   | 0          | 0          |
|                  | Darmor_AUP_DOSW_2_D09BTACXX.I | 0   | 0          | 0          |
|                  | Darmor_AUP_FOSW_4_D09BTACXX.I | 0   | 0          | 0          |
|                  | Darmor_AUP_HOSW_5_D09BTACXX.I | 0   | 0          | 0          |
|                  | Darmor_AUP_IAOSW_1_1_C0UW4A   | 0   | 0          | 0          |
|                  | Darmor_AUP_KAOSW_2_1_C0UW4A   | 0   | 0          | 0          |
|                  | Darmor_AUP_LAOSW_3_1_C0UW4A   | 0   | 0          | 0          |
|                  | Darmor_AUP_MAOSW_4_1_C0UW4A   | 0   | 0          | 0          |
|                  | Darmor_AUP_NAOSW_5_1_C0UW4A   | 0   | 0          | 0          |
|                  | Darmor_AUP_PAOSW_6_1_C0UW4A   | 0   | 0          | 0          |
|                  | Ningyou_ERR037335             | 0   | 0          | 0          |

|  |                 |   |          |   |
|--|-----------------|---|----------|---|
|  | TN04_ERR037297  | 0 | 0        | 0 |
|  | TN05_ERR037298  | 0 | 0        | 0 |
|  | TN08_ERR037301  | 0 | 0        | 0 |
|  | TN103_ERR037317 | 0 | 0        | 0 |
|  | TN108_ERR037318 | 0 | 0        | 0 |
|  | TN109_ERR037319 | 0 | 0        | 0 |
|  | TN10_ERR037294  | 0 | 0        | 0 |
|  | TN121_ERR037320 | 0 | 0        | 0 |
|  | TN124_ERR037321 | 0 | 0        | 0 |
|  | TN126_ERR037322 | 0 | 0        | 0 |
|  | TN128_ERR037323 | 0 | 0        | 0 |
|  | TN129_ERR037324 | 0 | 0        | 0 |
|  | TN12_ERR037302  | 0 | 0        | 0 |
|  | TN138_ERR037325 | 0 | 0        | 0 |
|  | TN149_ERR037326 | 0 | 0        | 0 |
|  | TN161_ERR037327 | 0 | 0        | 0 |
|  | TN163_ERR037328 | 0 | 0        | 0 |
|  | TN170_ERR037329 | 0 | 0        | 0 |
|  | TN171_ERR037332 | 0 | 0        | 0 |
|  | TN172_ERR037333 | 0 | 0        | 0 |
|  | TN176_ERR037330 | 0 | 0        | 0 |
|  | TN177_ERR037331 | 0 | 0        | 0 |
|  | TN24_ERR037299  | 0 | 0        | 0 |
|  | TN28_ERR037295  | 0 | 2.13E-62 | 0 |
|  | TN30_ERR037305  | 0 | 0        | 0 |
|  | TN31_ERR037303  | 0 | 0        | 0 |
|  | TN38_ERR037304  | 0 | 0        | 0 |
|  | TN44_ERR037306  | 0 | 0        | 0 |
|  | TN48_ERR037307  | 0 | 0        | 0 |
|  | TN51_ERR037308  | 0 | 0        | 0 |
|  | TN57_ERR037309  | 0 | 0        | 0 |
|  | TN72_ERR037312  | 0 | 0        | 0 |
|  | TN76_ERR037311  | 0 | 0        | 0 |

|                  |                               |     |            |            |
|------------------|-------------------------------|-----|------------|------------|
|                  | TN77_ERR037310                | 0   | 0          | 0          |
|                  | TN85_ERR037315                | 0   | 0          | 0          |
|                  | TN88_ERR037313                | 0   | 0          | 0          |
|                  | TN90_ERR037316                | 0   | 0          | 0          |
|                  | Tapidor_ERR037334             | 0   | 0          | 0          |
| BnaC02g00010.1D2 | Darmor_AUP_AOSW_2_D09BTACXX.I | 157 | 4.680896   | 4.142316   |
|                  | Darmor_AUP_BOSW_3_D09BTACXX.I | 125 | 5.070501   | 4.187642   |
|                  | Darmor_AUP_DOSW_2_D09BTACXX.I | 76  | 1.999601   | 1.488351   |
|                  | Darmor_AUP_FOSW_4_D09BTACXX.I | 118 | 3.334655   | 3.108181   |
|                  | Darmor_AUP_HOSW_5_D09BTACXX.I | 176 | 7.658962   | 6.879841   |
|                  | Darmor_AUP_IAOSW_1_1_C0UW4A   | 385 | 4.183141   | 3.91453    |
|                  | Darmor_AUP_KAOSW_2_1_C0UW4A   | 441 | 5.148202   | 4.7718     |
|                  | Darmor_AUP_LAOSW_3_1_C0UW4A   | 340 | 3.790865   | 3.48466    |
|                  | Darmor_AUP_MAOSW_4_1_C0UW4A   | 354 | 4.017043   | 3.70154    |
|                  | Darmor_AUP_NAOSW_5_1_C0UW4A   | 269 | 2.878456   | 2.67858    |
|                  | Darmor_AUP_PAOSW_6_1_C0UW4A   | 409 | 4.438149   | 4.399437   |
|                  | Ningyou_ERR037335             | 8   | 0.3454556  | 0.2705881  |
|                  | TN04_ERR037297                | 9   | 0.3358857  | 0.3119312  |
|                  | TN05_ERR037298                | 14  | 0.6131378  | 0.1206824  |
|                  | TN08_ERR037301                | 5   | 0.6011433  | 0.5955105  |
|                  | TN103_ERR037317               | 13  | 0.8101882  | 0.4214662  |
|                  | TN108_ERR037318               | 15  | 0.8511315  | 0.6469414  |
|                  | TN109_ERR037319               | 11  | 0.4344936  | 0.23968    |
|                  | TN10_ERR037294                | 11  | 0.3780354  | 0.34952    |
|                  | TN121_ERR037320               | 9   | 0.3390673  | 0.02884233 |
|                  | TN124_ERR037321               | 10  | 0.3270449  | 0.221603   |
|                  | TN126_ERR037322               | 6   | 0.4294605  | 0.4224717  |
|                  | TN128_ERR037323               | 3   | 0.09750629 | 0.08733423 |
|                  | TN129_ERR037324               | 11  | 0.3676589  | 0.06198691 |
|                  | TN12_ERR037302                | 10  | 0.3727368  | 0.3524048  |
|                  | TN138_ERR037325               | 10  | 0.437225   | 0.427548   |
|                  | TN149_ERR037326               | 8   | 0.3868991  | 0.3784844  |
|                  | TN161_ERR037327               | 2   | 0.08760107 | 0.08725725 |



|  |                   |    |            |            |
|--|-------------------|----|------------|------------|
|  | TN163_ERR037328   | 2  | 0.07761408 | 0.07131885 |
|  | TN170_ERR037329   | 17 | 0.6713735  | 0.6099389  |
|  | TN171_ERR037332   | 7  | 0.3849667  | 0.3469346  |
|  | TN172_ERR037333   | 8  | 0.4116688  | 0          |
|  | TN176_ERR037330   | 18 | 0.6970785  | 0.4851102  |
|  | TN177_ERR037331   | 8  | 0.2876884  | 0.2813476  |
|  | TN24_ERR037299    | 6  | 0.8180671  | 0.7046093  |
|  | TN28_ERR037295    | 9  | 0.2901523  | 0.2559663  |
|  | TN30_ERR037305    | 8  | 0.3072847  | 0          |
|  | TN31_ERR037303    | 5  | 0.1909596  | 0.1728963  |
|  | TN38_ERR037304    | 10 | 0.5030703  | 0.2507862  |
|  | TN44_ERR037306    | 5  | 0.4790666  | 0.4366026  |
|  | TN48_ERR037307    | 6  | 0.2353474  | 0.207091   |
|  | TN51_ERR037308    | 16 | 0.7247479  | 0.5217364  |
|  | TN57_ERR037309    | 8  | 0.2702777  | 0.2658199  |
|  | TN72_ERR037312    | 7  | 0.2805417  | 0.2497752  |
|  | TN76_ERR037311    | 11 | 0.4002301  | 0.3884019  |
|  | TN77_ERR037310    | 9  | 0.3143319  | 0.2938348  |
|  | TN85_ERR037315    | 17 | 1.114377   | 0.9160358  |
|  | TN88_ERR037313    | 6  | 0.7216628  | 0.7091752  |
|  | TN90_ERR037316    | 13 | 0.4896906  | 0.3805109  |
|  | Tapidor_ERR037334 | 10 | 0.4500867  | 0.3721501  |



|           |            |
|-----------|------------|
| 0         | 0          |
| 0         | 0          |
| 0         | 0          |
| 0         | 0          |
| 0         | 0          |
| 0         | 0          |
| 0         | 0          |
| 0         | 0          |
| 0         | 0          |
| 0         | 0          |
| 0         | 0          |
| 0         | 0          |
| 0         | 0          |
| 0         | 0          |
| 0         | 0          |
| 0         | 0          |
| 0         | 0          |
| 0         | 0          |
| 0         | 0          |
| 0         | 0          |
| 0         | 0          |
| 0         | 0          |
| 0         | 0          |
| 4.633826  | 2.365997   |
| 9.408311  | 5.497614   |
| 5.524546  | 2.816585   |
| 4.861502  | 2.531896   |
| 3.91257   | 2.235188   |
| 5.458762  | 3.966943   |
| 5.236073  | 3.876276   |
| 5.686298  | 3.880153   |
| 5.967703  | 4.078935   |
| 6.787098  | 4.600241   |
| 5.503531  | 4.285506   |
| 0.0404371 | 0.03017504 |
| 7.05E-16  | 2.02E-27   |
| 0.2041466 | 0.1392246  |

|            |            |
|------------|------------|
| 2.92E-17   | 4.36E-29   |
| 0.095068   | 0.06513085 |
| 1.29E-14   | 2.97E-28   |
| 0.03875444 | 0.02517793 |
| 5.89E-10   | 1.51E-17   |
| 1.38E-13   | 3.06E-23   |
| 0.03294048 | 0.02248897 |
| 0.08779041 | 0.05131935 |
| 2.21E-16   | 7.34E-29   |
| 1.21E-10   | 1.05E-18   |
| 0.03831809 | 0.02575713 |
| 8.42E-16   | 1.05E-28   |
| 0.2377126  | 0.066954   |
| 0.2797166  | 0.03532725 |
| 0.1206086  | 0.05172356 |
| 0.06455451 | 0.04329789 |
| 6.90E-11   | 1.63E-18   |
| 0.0627381  | 0.04467514 |
| 7.91E-19   | 2.65E-33   |
| 9.98E-17   | 1.81E-29   |
| 0.05344719 | 0.03056242 |
| 2.82E-15   | 3.38E-26   |
| 9.10E-09   | 8.31E-14   |
| 7.41E-14   | 9.19E-26   |
| 0.05757544 | 0.02470954 |
| 1.62E-13   | 3.73E-25   |
| 0.03856848 | 0.02769259 |
| 0.05522242 | 0.03214328 |
| 0.04613227 | 0.02328608 |
| 6.84E-10   | 1.41E-16   |
| 0.03793936 | 0.02381222 |
| 3.37E-15   | 8.31E-29   |
| 7.55E-17   | 1.55E-26   |







|            |            |
|------------|------------|
| 3.26E-19   | 1.77E-29   |
| 0          | 0          |
| 8.68E-28   | 1.39E-41   |
| 0          | 0          |
| 0.1210097  | 0.06985363 |
| 0.08222614 | 0.05176053 |
| 1.98E-20   | 2.32E-37   |
| 0          | 0          |
| 0.04206064 | 0.02445101 |
| 0.02813636 | 0.02244326 |
| 0.0421691  | 0.03287617 |
| 0          | 0          |
| 0          | 0          |
| 0          | 0          |
| 0.03984651 | 0.03145234 |
| 3.31E-24   | 1.83E-45   |
| 0          | 0          |
| 0          | 0          |
| 0          | 0          |
| 0          | 0          |
| 0          | 0          |
| 1.72E-17   | 5.91E-33   |
| 0          | 0          |
| 0          | 0          |
| 0          | 0          |
| 0          | 0          |
| 0          | 0          |
| 1.47E-22   | 1.40E-44   |
| 0          | 0          |
| 0          | 0          |
| 0          | 0          |
| 0          | 0          |
| 0          | 0          |







|           |           |
|-----------|-----------|
| 0         | 0         |
| 0         | 0         |
| 0         | 0         |
| 0         | 0         |
| 0         | 0         |
| 7.35772   | 1.90737   |
| 3.744512  | 1.838734  |
| 11.58224  | 4.130881  |
| 62.9997   | 29.73521  |
| 11.60892  | 3.913489  |
| 0.794283  | 0.58169   |
| 2.490961  | 1.338925  |
| 45.81246  | 29.65461  |
| 54.02361  | 35.15582  |
| 35.38247  | 22.27805  |
| 1.783346  | 0.3544986 |
| 0.1825887 | 0.1364018 |
| 3.06E-13  | 2.81E-25  |
| 1.44E-09  | 8.26E-18  |
| 1.09E-13  | 2.89E-26  |
| 4.96E-11  | 2.79E-22  |
| 4.26E-13  | 1.70E-25  |
| 4.55E-14  | 1.14E-26  |
| 0.3238818 | 0.1080703 |
| 5.19E-14  | 1.28E-26  |
| 8.99E-13  | 2.88E-24  |
| 1.59E-12  | 1.40E-23  |
| 2.15E-10  | 1.54E-19  |
| 7.56E-12  | 3.33E-22  |
| 1.54E-10  | 5.35E-19  |
| 1.52E-13  | 1.13E-25  |
| 7.46E-14  | 1.84E-25  |
| 8.07E-14  | 4.41E-26  |





|             |             |
|-------------|-------------|
| 0           | 0           |
| 0           | 0           |
| 0           | 0           |
| 0           | 0           |
| 0           | 0           |
| 0           | 0           |
| 3.13E-20    | 1.79E-39    |
| 3.35E-17    | 1.49E-32    |
| 2.18E-22    | 2.13E-38    |
| 0.02064234  | 0.003976698 |
| 0.691058    | 0.156209    |
| 0           | 0           |
| 0           | 0           |
| 0           | 0           |
| 0.008307326 | 0.001998395 |
| 0           | 0           |
| 1.21E-27    | 9.32E-49    |
| 1.13E-05    | 1.40E-06    |
| 3.32E-23    | 2.16E-43    |
| 3.91E-19    | 2.04E-35    |
| 0           | 0           |
| 8.33E-21    | 1.81E-32    |
| 9.49E-16    | 2.13E-28    |
| 0           | 0           |
| 5.02E-23    | 9.35E-38    |
| 2.76E-17    | 4.13E-33    |
| 1.14E-06    | 2.23E-09    |
| 1.18E-17    | 6.32E-34    |
| 0           | 0           |
| 6.53E-18    | 1.70E-25    |
| 1.47E-18    | 1.33E-31    |
| 4.16E-17    | 4.18E-32    |
| 1.01E-16    | 3.33E-27    |

|             |             |
|-------------|-------------|
| 1.81E-16    | 1.40E-31    |
| 1.13E-17    | 1.63E-27    |
| 1.35E-06    | 8.68E-10    |
| 2.57E-18    | 3.41E-35    |
| 3.85E-21    | 4.86E-40    |
| 2.10E-25    | 1.14E-45    |
| 6.69E-05    | 4.57E-06    |
| 2.03E-15    | 1.29E-25    |
| 1.25E-17    | 1.96E-33    |
| 6.07E-19    | 2.58E-31    |
| 2.13E-17    | 2.93E-31    |
| 1.36E-18    | 1.90E-35    |
| 0.009579351 | 0.001283698 |
| 4.11E-16    | 1.29E-29    |
| 1.50E-14    | 9.29E-28    |
| 5.07E-19    | 9.32E-33    |
| 3.92E-18    | 3.97E-32    |
| 1.75E-18    | 5.04E-33    |
| 4.67E-26    | 9.85E-42    |
| 0           | 0           |
| 1.52E-19    | 5.58E-33    |
| 0           | 0           |
| 1.075181    | 0.001197652 |
| 6.221382    | 3.605799    |
| 17.68716    | 10.93903    |
| 6.547087    | 3.408064    |
| 5.192892    | 3.000608    |
| 2.526188    | 1.467668    |
| 4.784488    | 3.775069    |
| 5.759209    | 4.490028    |
| 2.365455    | 1.709128    |
| 2.632846    | 1.900058    |
| 2.740802    | 1.972353    |

|           |            |
|-----------|------------|
| 4.539665  | 3.583327   |
| 1.15E-16  | 2.57E-31   |
| 6.06E-17  | 2.18E-32   |
| 1.51E-14  | 3.81E-28   |
| 0         | 0          |
| 1.76E-13  | 8.60E-26   |
| 3.39E-18  | 1.70E-28   |
| 3.36E-17  | 1.61E-32   |
| 0.1400114 | 0.09891473 |
| 2.67E-16  | 3.03E-31   |
| 4.75E-18  | 1.26E-32   |
| 8.05E-15  | 1.12E-27   |
| 1.21E-21  | 3.38E-33   |
| 1.11E-14  | 2.04E-28   |
| 3.35E-17  | 1.06E-32   |
| 6.39E-17  | 1.08E-31   |
| 1.42E-16  | 1.17E-25   |
| 6.37E-19  | 1.52E-32   |
| 1.30E-18  | 4.70E-26   |
| 2.99E-17  | 3.36E-33   |
| 5.70E-15  | 8.38E-28   |
| 4.33E-15  | 5.72E-27   |
| 2.94E-17  | 2.38E-30   |
| 1.34E-20  | 1.13E-32   |
| 2.09E-13  | 6.01E-23   |
| 1.15E-17  | 4.41E-32   |
| 8.78E-15  | 1.03E-27   |
| 2.87E-17  | 6.57E-33   |
| 1.53E-17  | 1.68E-27   |
| 2.16E-18  | 1.62E-30   |
| 0         | 0          |
| 2.92E-16  | 6.60E-31   |
| 1.69E-18  | 1.70E-33   |



|           |           |
|-----------|-----------|
| 3.09E-14  | 9.96E-27  |
| 3.94E-15  | 2.76E-27  |
| 1.31E-15  | 0         |
| 9.50E-20  | 1.90E-32  |
| 2.66E-16  | 2.38E-30  |
| 1.33E-14  | 9.73E-28  |
| 5.28E-16  | 1.95E-28  |
| 4.991039  | 1.969666  |
| 5.052195  | 2.071534  |
| 6.02997   | 2.36998   |
| 7.062854  | 3.326982  |
| 8.877743  | 3.821746  |
| 2.555459  | 1.787426  |
| 3.106676  | 2.001085  |
| 3.769594  | 2.199118  |
| 3.880482  | 2.517789  |
| 2.953572  | 1.604999  |
| 4.392504  | 2.59639   |
| 5.935315  | 2.748858  |
| 1.024793  | 0.358823  |
| 2.522718  | 0.9125014 |
| 2.151388  | 1.09149   |
| 4.097166  | 1.427844  |
| 3.864414  | 1.917368  |
| 2.480218  | 1.147978  |
| 1.003448  | 0.2770011 |
| 1.760451  | 0.642606  |
| 1.527641  | 0.6791017 |
| 1.581907  | 0.6342608 |
| 2.56E-08  | 7.58E-16  |
| 3.740284  | 1.33209   |
| 0.8077762 | 0.5117289 |
| 2.05167   | 0.7160956 |

|           |           |
|-----------|-----------|
| 3.502767  | 0.7627759 |
| 5.863858  | 0.7521246 |
| 1.544452  | 0.4540025 |
| 4.741584  | 2.079596  |
| 9.83E-10  | 6.10E-18  |
| 5.009875  | 2.400825  |
| 2.528451  | 1.099024  |
| 0.8005128 | 0.400797  |
| 1.08E-12  | 2.97E-24  |
| 4.383734  | 1.821155  |
| 1.441136  | 0.5331669 |
| 4.159735  | 1.777944  |
| 2.146979  | 1.10876   |
| 6.303878  | 2.175857  |
| 2.111031  | 1.134319  |
| 1.356326  | 0.724047  |
| 0.8301472 | 0.4359988 |
| 0.9200027 | 0.2919278 |
| 1.115456  | 0.4240309 |
| 3.41E-10  | 2.62E-19  |
| 0.9958073 | 0.2888964 |
| 1.24E-07  | 4.81E-14  |
| 1.113341  | 0.2814561 |
| 0.2464683 | 0.1022832 |
| 2.10E-16  | 4.64E-27  |
| 5.34E-12  | 1.94E-20  |
| 3.03E-19  | 1.72E-32  |
| 8.59E-13  | 7.47E-25  |
| 1.88E-14  | 2.08E-26  |
| 0         | 0         |
| 0         | 0         |
| 5.21E-23  | 1.17E-41  |
| 9.47E-17  | 1.32E-32  |

|              |             |
|--------------|-------------|
| 5.23E-22     | 1.00E-41    |
| 3.46E-19     | 8.00E-32    |
| 0            | 0           |
| 1.64E-10     | 6.92E-21    |
| 0            | 0           |
| 0            | 0           |
| 0            | 0           |
| 0            | 0           |
| 0.0243263    | 0.005461134 |
| 0.001110462  | 5.43E-07    |
| 0.8349221    | 0.3018913   |
| 0            | 0           |
| 1.16E-12     | 1.31E-19    |
| 1.03E-13     | 1.29E-26    |
| 0            | 0           |
| 0.0001527237 | 5.69E-06    |
| 0            | 0           |
| 0            | 0           |
| 0            | 0           |
| 0            | 0           |
| 0            | 0           |
| 8.29E-18     | 1.83E-19    |
| 0            | 0           |
| 0            | 0           |
| 2.69E-14     | 6.19E-26    |
| 2.29E-14     | 2.73E-25    |
| 1.44E-05     | 2.66E-06    |
| 0            | 0           |
| 1.66E-27     | 1.93E-56    |
| 0.3755089    | 0.08490488  |
| 1.86E-10     | 6.20E-21    |
| 3.02E-11     | 1.60E-22    |
| 0.005004739  | 0.001210914 |

|              |             |
|--------------|-------------|
| 1.36E-14     | 2.12E-24    |
| 2.62E-12     | 1.45E-24    |
| 8.03E-15     | 6.15E-28    |
| 1.30E-15     | 4.08E-26    |
| 2.90E-06     | 1.11E-12    |
| 0            | 0           |
| 4.49E-13     | 5.64E-22    |
| 6.98E-15     | 2.81E-28    |
| 1.37E-06     | 7.61E-14    |
| 6.40E-14     | 6.77E-21    |
| 0.0004700123 | 1.46E-08    |
| 5.09E-05     | 1.19E-10    |
| 4.93E-08     | 1.65E-16    |
| 5.84E-14     | 1.40E-26    |
| 1.11E-12     | 3.80E-25    |
| 5.61E-06     | 6.13E-12    |
| 4.574        | 1.361247    |
| 1.84E-08     | 5.83E-17    |
| 0.147831     | 0.004159981 |
| 4.13E-14     | 8.15E-24    |
| 1.87E-27     | 1.66E-47    |
| 2.31E-21     | 2.04E-38    |
| 1.45E-24     | 1.14E-46    |
| 7.07E-27     | 1.30E-52    |
| 8.59E-20     | 1.78E-31    |
| 2.67E-25     | 8.07E-45    |
| 2.12E-17     | 5.36E-25    |
| 1.56E-25     | 1.11E-44    |
| 9.71E-28     | 1.29E-54    |
| 9.10E-15     | 2.66E-24    |
| 1.24E-16     | 2.73E-33    |
| 1.43E-24     | 1.08E-40    |
| 2.36E-23     | 3.96E-45    |

|          |          |
|----------|----------|
| 1.40E-29 | 7.92E-62 |
| 0        | 0        |
| 2.64E-21 | 9.95E-34 |
| 2.02E-19 | 1.37E-38 |
| 3.00E-20 | 1.34E-38 |
| 9.04E-32 | 1.68E-66 |
| 5.58E-15 | 6.51E-30 |
| 7.82E-16 | 1.05E-30 |
| 4.77E-14 | 7.28E-29 |
| 1.28E-20 | 1.89E-38 |
| 5.02E-09 | 5.70E-17 |
| 1.43E-23 | 5.58E-45 |
| 7.55E-25 | 6.57E-37 |
| 8.19E-22 | 1.84E-44 |
| 4.38E-12 | 1.86E-22 |
| 1.23E-25 | 5.24E-50 |
| 6.59E-19 | 6.65E-37 |
| 4.73E-31 | 4.32E-65 |
| 4.88E-17 | 5.92E-31 |
| 6.07E-38 | 1.15E-78 |
| 7.05E-29 | 1.21E-60 |
| 1.44E-26 | 1.38E-47 |
| 1.03E-21 | 6.47E-37 |
| 6.16E-37 | 9.36E-77 |
| 2.09E-16 | 8.12E-23 |
| 24.97749 | 12.19847 |
| 34.92853 | 18.88802 |
| 21.81151 | 10.43656 |
| 19.29249 | 9.115542 |
| 23.32074 | 10.83667 |
| 25.20461 | 18.51945 |
| 29.98355 | 21.30329 |
| 15.28997 | 9.891837 |

|          |          |
|----------|----------|
| 13.90977 | 8.940801 |
| 12.93365 | 8.092618 |
| 28.39911 | 20.51949 |
| 29.7479  | 17.37138 |
| 10.74617 | 5.225639 |
| 22.87542 | 12.01907 |
| 18.28576 | 8.756802 |
| 24.48138 | 12.35911 |
| 25.51013 | 13.33157 |
| 30.98703 | 16.80804 |
| 18.80106 | 9.484045 |
| 26.77935 | 14.12338 |
| 14.10712 | 7.112524 |
| 18.21073 | 9.697528 |
| 6.85E-10 | 3.05E-18 |
| 37.19798 | 21.02943 |
| 15.11944 | 7.41927  |
| 29.29061 | 14.85595 |
| 12.70877 | 5.632732 |
| 10.31869 | 4.229802 |
| 17.93355 | 8.72163  |
| 27.28081 | 15.54573 |
| 2.57E-12 | 1.02E-22 |
| 25.43245 | 14.39216 |
| 21.80732 | 12.08257 |
| 8.701843 | 4.08977  |
| 6.01E-09 | 4.90E-16 |
| 27.27808 | 14.89191 |
| 21.97555 | 11.42857 |
| 20.04252 | 11.1676  |
| 25.9841  | 13.44185 |
| 6.068639 | 3.032336 |
| 18.67077 | 9.822935 |

|            |            |
|------------|------------|
| 26.04115   | 13.34114   |
| 9.294552   | 4.14664    |
| 13.97056   | 6.570788   |
| 9.422897   | 4.510472   |
| 1.49E-10   | 1.39E-19   |
| 16.62009   | 7.80775    |
| 3.57E-12   | 8.49E-22   |
| 12.67616   | 5.988152   |
| 3.82E-09   | 1.59E-15   |
| 0.3234826  | 0.08242444 |
| 0.09414451 | 0.05926916 |
| 0          | 0          |
| 2.38E-06   | 1.80E-09   |
| 1.671551   | 0.7064919  |
| 0          | 0          |
| 0.03302563 | 0.02574767 |
| 0          | 0          |
| 0          | 0          |
| 0          | 0          |
| 0.03198871 | 0.02524989 |
| 2.49E-23   | 1.82E-44   |
| 0          | 0          |
| 0          | 0          |
| 0          | 0          |
| 0          | 0          |
| 0          | 0          |
| 0          | 0          |
| 0          | 0          |
| 9.31E-19   | 1.68E-31   |
| 0          | 0          |
| 0          | 0          |
| 0          | 0          |
| 1.40E-17   | 5.12E-33   |
| 1.45E-12   | 7.66E-24   |

|           |           |
|-----------|-----------|
| 7.64E-23  | 7.51E-43  |
| 3.62E-22  | 4.72E-44  |
| 0         | 0         |
| 0         | 0         |
| 0         | 0         |
| 0         | 0         |
| 0         | 0         |
| 2.84E-24  | 1.96E-43  |
| 1.81E-22  | 2.45E-42  |
| 0         | 0         |
| 4.52E-21  | 4.91E-41  |
| 3.05E-28  | 7.37E-55  |
| 8.17E-23  | 2.78E-45  |
| 0         | 0         |
| 6.08E-20  | 9.25E-36  |
| 0         | 0         |
| 0         | 0         |
| 1.04E-22  | 3.66E-40  |
| 0         | 0         |
| 0         | 0         |
| 1.18E-18  | 1.11E-33  |
| 0         | 0         |
| 3.69E-27  | 2.06E-51  |
| 1.74E-23  | 1.54E-43  |
| 0         | 0         |
| 0         | 0         |
| 1.401177  | 0.5199271 |
| 1.732075  | 1.044809  |
| 3.967733  | 1.747849  |
| 2.867684  | 1.583564  |
| 1.849557  | 1.059886  |
| 0.6569947 | 0.5240586 |
| 0.585431  | 0.4561291 |



|           |           |
|-----------|-----------|
| 1.354144  | 0.9387103 |
| 1.289213  | 0.9303446 |
| 1.144822  | 0.7649245 |
| 0.8919591 | 0.7040568 |
| 2.713478  | 1.743143  |
| 0.6825702 | 0.4613136 |
| 2.369022  | 1.51969   |
| 0.361505  | 0.2344259 |
| 1.318829  | 0.5784365 |
| 1.734427  | 0.9004769 |
| 3.61466   | 1.729368  |
| 0.9781265 | 0.642314  |
| 2.625842  | 1.139021  |
| 0.3894716 | 0.2843684 |
| 2.029283  | 1.246351  |
| 7.30E-17  | 4.86E-30  |
| 1.665869  | 1.036138  |
| 2.232482  | 1.01284   |
| 3.366862  | 1.123789  |
| 1.054906  | 0.6907011 |
| 0.2213048 | 0.1481528 |
| 0.9443633 | 0.5671095 |
| 1.966776  | 1.213197  |
| 7.69E-10  | 2.16E-17  |
| 1.260494  | 0.6798762 |
| 1.444259  | 0.9230138 |
| 0.4418632 | 0.2958908 |
| 5.56E-14  | 1.05E-27  |
| 1.348899  | 0.9363373 |
| 2.064056  | 1.146853  |
| 2.083083  | 0.6834073 |
| 1.910626  | 1.258249  |
| 0.6486334 | 0.4652396 |

|           |           |
|-----------|-----------|
| 1.983689  | 0.7702905 |
| 1.553759  | 0.9737753 |
| 0.4501817 | 0.3248926 |
| 1.869323  | 0.7114948 |
| 0.6992366 | 0.4803315 |
| 3.78E-17  | 2.27E-28  |
| 2.403243  | 1.075847  |
| 3.96E-15  | 8.93E-27  |
| 2.142337  | 0.5532153 |
| 1.17E-15  | 1.05E-27  |
| 2.406245  | 1.333801  |
| 4.88282   | 3.007688  |
| 6.144368  | 2.989927  |
| 1.805636  | 0.68503   |
| 6.83444   | 3.626287  |
| 2.968271  | 2.367672  |
| 2.040334  | 1.589989  |
| 0.4391703 | 0.3173029 |
| 0.6986326 | 0.5041853 |
| 0.6756692 | 0.4862293 |
| 2.686542  | 2.106647  |
| 0.9724051 | 0.5631246 |
| 3.98E-14  | 3.33E-24  |
| 3.37E-16  | 5.70E-29  |
| 3.72E-18  | 4.83E-32  |
| 4.77E-10  | 4.09E-17  |
| 4.28E-14  | 4.84E-27  |
| 8.69E-16  | 4.79E-31  |
| 1.12E-16  | 3.72E-30  |
| 4.58E-17  | 2.72E-31  |
| 4.00E-15  | 1.33E-26  |
| 9.39E-13  | 3.36E-24  |
| 1.69E-14  | 1.92E-27  |

|            |            |
|------------|------------|
| 1.19E-08   | 7.49E-13   |
| 9.25E-14   | 4.58E-27   |
| 9.72E-09   | 1.77E-16   |
| 1.61E-17   | 4.92E-32   |
| 1.455018   | 0.526602   |
| 0.2036059  | 0.1080929  |
| 2.63E-12   | 1.03E-20   |
| 1.55E-16   | 1.25E-30   |
| 1.38E-14   | 2.13E-27   |
| 1.76E-15   | 8.58E-30   |
| 1.11E-14   | 4.02E-28   |
| 2.12E-14   | 6.60E-25   |
| 1.45E-14   | 2.03E-26   |
| 3.67E-14   | 3.15E-27   |
| 0.4738073  | 0.3416664  |
| 0.08491427 | 0.05736764 |
| 3.08E-15   | 1.02E-27   |
| 7.20E-14   | 2.69E-26   |
| 0.5125251  | 0.3709769  |
| 1.71747    | 0.9491224  |
| 0.04273242 | 0.02930015 |
| 7.11E-17   | 9.73E-31   |
| 1.13372    | 0.7281303  |
| 2.52E-16   | 8.10E-31   |
| 1.51E-05   | 1.03E-05   |
| 1.17E-11   | 3.59E-18   |
| 1.62E-15   | 4.79E-26   |
| 1.663273   | 0.7785622  |
| 0.9641807  | 0.4948282  |
| 5.421754   | 2.649903   |
| 11.02096   | 5.832047   |
| 8.527116   | 4.432761   |
| 1.16746    | 0.7491101  |

|          |           |
|----------|-----------|
| 1.76579  | 1.171914  |
| 7.408129 | 5.016057  |
| 7.211764 | 4.889009  |
| 6.257456 | 4.167668  |
| 1.404799 | 0.9848209 |
| 5.761144 | 3.316722  |
| 1.671267 | 0.9309682 |
| 2.074762 | 0.9014509 |
| 3.09819  | 1.492413  |
| 2.230899 | 1.072947  |
| 4.122175 | 2.066488  |
| 1.899017 | 1.016325  |
| 3.845724 | 2.105606  |
| 2.463111 | 1.239636  |
| 2.97444  | 1.617463  |
| 2.863124 | 1.504748  |
| 0.514359 | 0.2495465 |
| 2.49997  | 1.242726  |
| 1.621688 | 0.7119464 |
| 2.70521  | 1.119958  |
| 3.098764 | 1.606563  |
| 1.855516 | 0.7774228 |
| 3.961669 | 2.185683  |
| 5.325841 | 3.032342  |
| 0.843943 | 0.5782434 |
| 6.960842 | 4.167233  |
| 4.96746  | 2.918971  |
| 3.110192 | 1.592043  |
| 1.043174 | 0.5773333 |
| 2.210337 | 1.15552   |
| 1.3707   | 0.7603033 |
| 3.444946 | 2.035243  |
| 1.460919 | 0.9729286 |













|             |             |
|-------------|-------------|
| 0.691058    | 0.156209    |
| 0           | 0           |
| 0           | 0           |
| 0           | 0           |
| 0.008307326 | 0.001998395 |
| 0           | 0           |
| 1.21E-27    | 9.32E-49    |
| 1.13E-05    | 1.40E-06    |
| 3.32E-23    | 2.16E-43    |
| 3.91E-19    | 2.04E-35    |
| 0           | 0           |
| 8.33E-21    | 1.81E-32    |
| 9.49E-16    | 2.13E-28    |
| 0           | 0           |
| 5.02E-23    | 9.35E-38    |
| 2.76E-17    | 4.13E-33    |
| 1.14E-06    | 2.23E-09    |
| 1.18E-17    | 6.32E-34    |
| 0           | 0           |
| 6.53E-18    | 1.70E-25    |
| 1.47E-18    | 1.33E-31    |
| 4.16E-17    | 4.18E-32    |
| 1.01E-16    | 3.33E-27    |
| 1.81E-16    | 1.40E-31    |
| 1.13E-17    | 1.63E-27    |
| 1.35E-06    | 8.68E-10    |
| 2.57E-18    | 3.41E-35    |
| 3.85E-21    | 4.86E-40    |
| 2.10E-25    | 1.14E-45    |
| 6.69E-05    | 4.57E-06    |
| 2.03E-15    | 1.29E-25    |
| 1.25E-17    | 1.96E-33    |
| 6.07E-19    | 2.58E-31    |

|             |             |
|-------------|-------------|
| 2.13E-17    | 2.93E-31    |
| 1.36E-18    | 1.90E-35    |
| 0.009579351 | 0.001283698 |
| 4.11E-16    | 1.29E-29    |
| 1.50E-14    | 9.29E-28    |
| 5.07E-19    | 9.32E-33    |
| 3.92E-18    | 3.97E-32    |
| 1.75E-18    | 5.04E-33    |
| 4.67E-26    | 9.85E-42    |
| 0           | 0           |
| 1.52E-19    | 5.58E-33    |
| 0           | 0           |
| 1.075181    | 0.001197652 |
| 30.18076    | 16.71474    |
| 21.65118    | 12.85841    |
| 36.03756    | 19.3326     |
| 10.598      | 5.435603    |
| 20.35354    | 10.74843    |
| 27.32371    | 21.30387    |
| 35.28668    | 27.28104    |
| 8.0347      | 5.784885    |
| 8.746447    | 6.067077    |
| 8.054512    | 5.516817    |
| 32.80699    | 25.74641    |
| 1.13E-14    | 3.00E-27    |
| 3.26E-11    | 1.37E-18    |
| 9.77E-15    | 5.04E-26    |
| 3.19E-15    | 5.79E-29    |
| 2.49E-13    | 1.40E-23    |
| 1.13E-13    | 2.99E-26    |
| 8.27E-15    | 3.23E-26    |
| 0.338444    | 0.2273744   |
| 4.10E-15    | 7.24E-29    |

|            |            |
|------------|------------|
| 1.55E-15   | 1.66E-29   |
| 1.11E-16   | 3.69E-29   |
| 2.66E-11   | 6.40E-19   |
| 1.35E-15   | 2.06E-29   |
| 3.42E-15   | 1.53E-27   |
| 1.34E-14   | 1.22E-24   |
| 1.17E-14   | 2.22E-28   |
| 3.06E-15   | 3.63E-28   |
| 2.37E-15   | 1.06E-28   |
| 2.49E-15   | 2.56E-28   |
| 1.52E-11   | 6.39E-19   |
| 1.94E-15   | 4.93E-29   |
| 1.32E-15   | 1.78E-29   |
| 1.20E-13   | 1.31E-22   |
| 3.23E-14   | 3.28E-26   |
| 1.79E-09   | 1.19E-17   |
| 4.17E-15   | 1.58E-28   |
| 1.68E-15   | 1.05E-28   |
| 5.54E-15   | 1.01E-28   |
| 1.51E-11   | 1.67E-19   |
| 2.13E-15   | 3.99E-28   |
| 1.07E-12   | 1.90E-21   |
| 1.78E-15   | 2.12E-29   |
| 4.07E-15   | 1.85E-28   |
| 1.04E-15   | 2.37E-29   |
| 0.04817373 | 0.03232619 |
| 2.38E-13   | 7.13E-23   |
| 6.35E-14   | 3.31E-24   |
| 2.69E-14   | 1.41E-27   |
| 4.62E-11   | 5.46E-18   |
| 3.186099   | 1.540759   |
| 3.34329    | 1.83841    |
| 1.03353    | 0.5010506  |

|            |            |
|------------|------------|
| 3.071066   | 1.519595   |
| 1.623223   | 0.7624236  |
| 3.003078   | 2.222989   |
| 2.266626   | 1.738749   |
| 1.436621   | 0.9362871  |
| 2.010351   | 1.395239   |
| 0.8539927  | 0.6075407  |
| 2.532856   | 1.981269   |
| 0.8474716  | 0.3264929  |
| 0.147673   | 0.075824   |
| 0.6288506  | 0.2379616  |
| 0.5150928  | 0.3534681  |
| 0.2465364  | 0.1568914  |
| 0.3992433  | 0.1541759  |
| 0.2815234  | 0.1897277  |
| 0.271781   | 0.1875705  |
| 0.2496655  | 0.1723702  |
| 0.5779899  | 0.2118696  |
| 0.07563627 | 0.05394786 |
| 1.40E-16   | 2.51E-31   |
| 0.4818954  | 0.3302936  |
| 0.2678238  | 0.187169   |
| 0.3124139  | 0.1142415  |
| 0.1731312  | 0.1183338  |
| 0.05623876 | 0.03833495 |
| 0.2280675  | 0.06453182 |
| 0.4540384  | 0.2185459  |
| 4.89E-16   | 9.64E-30   |
| 0.3261497  | 0.2254491  |
| 0.5294599  | 0.2528912  |
| 0.2523099  | 0.1040061  |
| 1.79E-06   | 3.45E-08   |
| 0.3997033  | 0.2766225  |

|            |            |
|------------|------------|
| 0.2138383  | 0.08828552 |
| 0.5717313  | 0.411967   |
| 0.4291894  | 0.1659008  |
| 0.1101396  | 0.07858884 |
| 0.1850465  | 0.1328683  |
| 0.1066693  | 0.07749489 |
| 0.1224038  | 0.05817576 |
| 0.1449708  | 0.09979799 |
| 0.09163243 | 0.05960033 |
| 1.34E-08   | 3.14E-13   |
| 0.07362589 | 0.04707796 |
| 0.119321   | 0.02913791 |
| 0.1753844  | 0.1190015  |
| 0.02219195 | 0.01764576 |
| 0.3130615  | 0.1308901  |
| 0.5339533  | 0.2867757  |
| 0.2459427  | 0.1374396  |
| 6.849665   | 3.599205   |
| 3.936597   | 2.12836    |
| 0.2550412  | 0.201849   |
| 0.3321434  | 0.2551047  |
| 6.840261   | 4.803956   |
| 6.547954   | 4.59441    |
| 6.637915   | 4.675038   |
| 0.2181625  | 0.171794   |
| 5.955989   | 4.039508   |
| 4.976842   | 3.080853   |
| 7.173643   | 4.475512   |
| 6.906089   | 4.217004   |
| 5.578146   | 3.352156   |
| 7.672379   | 4.84439    |
| 6.88E-13   | 2.39E-23   |
| 7.767016   | 4.871451   |

|            |            |
|------------|------------|
| 1.32E-13   | 1.39E-24   |
| 8.14E-15   | 4.78E-27   |
| 1.05E-13   | 6.59E-25   |
| 6.732224   | 4.232994   |
| 6.82241    | 4.201955   |
| 1.49E-14   | 7.06E-27   |
| 6.08E-14   | 2.24E-25   |
| 1.24E-13   | 3.34E-24   |
| 4.395931   | 2.775347   |
| 8.713248   | 5.375534   |
| 0.03917542 | 0.02134181 |
| 5.140258   | 3.251437   |
| 9.33E-15   | 2.14E-27   |
| 8.237133   | 5.128727   |
| 0.03484296 | 0.02291507 |
| 1.25E-13   | 1.63E-25   |
| 7.450648   | 4.840059   |
| 5.962069   | 3.783657   |
| 8.56174    | 5.626074   |
| 0.1331272  | 0.03349218 |
| 6.49643    | 3.947484   |
| 3.01E-14   | 6.75E-26   |
| 2.77E-14   | 1.46E-25   |
| 6.83688    | 4.401136   |
| 6.744623   | 4.107827   |
| 7.320832   | 4.273425   |
| 3.705654   | 2.136094   |
| 8.537891   | 5.075499   |
| 5.027198   | 2.993134   |
| 9.847574   | 5.988745   |
| 3.52E-13   | 1.55E-23   |
| 1.235115   | 0.7184949  |
| 0.7872366  | 0.4956089  |

|            |            |
|------------|------------|
| 1.032746   | 0.5788561  |
| 0.3422698  | 0.1977898  |
| 0.09876414 | 0.05741432 |
| 0.2951762  | 0.2354504  |
| 0.3295639  | 0.2569369  |
| 0.2273112  | 0.1642406  |
| 0.09757736 | 0.07041908 |
| 0.2323525  | 0.167207   |
| 0.1977747  | 0.156111   |
| 0.1243369  | 0.09174926 |
| 0          | 0          |
| 2.64E-27   | 3.46E-54   |
| 6.27E-25   | 5.57E-38   |
| 0          | 0          |
| 0          | 0          |
| 0          | 0          |
| 7.83E-24   | 2.94E-47   |
| 3.55E-21   | 8.83E-38   |
| 0          | 0          |
| 5.94E-20   | 2.52E-35   |
| 3.51E-22   | 2.02E-36   |
| 1.06E-18   | 1.52E-29   |
| 0          | 0          |
| 0          | 0          |
| 3.11E-22   | 6.34E-43   |
| 0          | 0          |
| 0          | 0          |
| 2.98E-14   | 2.48E-28   |
| 1.14E-29   | 3.32E-61   |
| 4.97E-19   | 3.85E-26   |
| 3.72E-08   | 2.60E-08   |
| 1.14E-20   | 3.93E-38   |
| 4.27E-21   | 2.85E-37   |



|            |            |
|------------|------------|
| 1.59E-23   | 2.07E-40   |
| 3.40E-51   | 2.74E-104  |
| 3.52E-20   | 2.11E-38   |
| 4.03E-23   | 1.04E-37   |
| 1.40E-43   | 6.44E-89   |
| 3.25E-37   | 1.76E-76   |
| 5.25E-47   | 1.37E-95   |
| 0          | 0          |
| 0          | 0          |
| 0          | 0          |
| 0          | 0          |
| 0          | 0          |
| 1.52E-12   | 5.20E-25   |
| 8.20E-24   | 4.87E-35   |
| 6.45E-20   | 8.35E-39   |
| 8.993329   | 4.72748    |
| 7.130019   | 3.881496   |
| 7.867748   | 3.881634   |
| 4.943122   | 2.402252   |
| 8.378265   | 4.348785   |
| 9.713163   | 7.375392   |
| 9.257265   | 6.93672    |
| 2.787677   | 1.997397   |
| 3.3375     | 2.325199   |
| 2.253008   | 1.529161   |
| 10.8016    | 8.20695    |
| 0.5905543  | 0.2121019  |
| 1.69E-09   | 1.01E-17   |
| 0.1071132  | 0.06591276 |
| 0.04932022 | 0.02252143 |
| 0.1542817  | 0.08661411 |
| 1.07E-08   | 3.19E-16   |
| 0.5552904  | 0.2313266  |

|            |            |
|------------|------------|
| 0.1022585  | 0.02034461 |
| 1.81E-10   | 1.66E-19   |
| 0.1653609  | 0.04937525 |
| 0.06573148 | 0.04022821 |
| 0.2176771  | 0.06932808 |
| 0.1073594  | 0.05878375 |
| 2.81E-09   | 3.06E-17   |
| 1.24E-10   | 3.44E-20   |
| 6.31E-09   | 1.84E-16   |
| 2.60E-12   | 2.65E-23   |
| 1.15E-09   | 3.92E-18   |
| 2.08E-12   | 2.05E-23   |
| 0.04780698 | 0.02196873 |
| 0.2952008  | 0.1028138  |
| 1.20E-10   | 5.98E-20   |
| 0.2888884  | 0.106012   |
| 0.5232891  | 0.213899   |
| 0.0429036  | 0.01962736 |
| 0.103175   | 0.06461893 |
| 0.140827   | 0.07051403 |
| 0.4601429  | 0.2412719  |
| 0.3102565  | 0.0960761  |
| 0.03766379 | 0.02399227 |
| 0.09627595 | 0.05613528 |
| 9.14E-13   | 2.99E-24   |
| 0.07821558 | 0.04924308 |
| 0.2380431  | 0.06611939 |
| 3.68E-12   | 5.55E-23   |
| 1.70E-12   | 9.25E-24   |
| 1.15E-09   | 7.13E-18   |
| 0.09928752 | 0.02188726 |
| 0.7481005  | 0.2506136  |
| 0          | 0          |







|          |          |
|----------|----------|
| 27.68174 | 16.1031  |
| 38.36585 | 24.15342 |
| 798.3912 | 20.77573 |
| 24.08864 | 13.92186 |
| 20.73745 | 12.05525 |
| 22.6368  | 18.05648 |
| 14.91014 | 11.62435 |
| 9.887364 | 7.143981 |
| 11.69283 | 8.438413 |
| 11.98611 | 8.625517 |
| 16.39936 | 12.94463 |
| 15.12175 | 11.28888 |
| 7.274361 | 4.935451 |
| 0        | 0        |
| 0        | 0        |
| 21.95681 | 13.46484 |
| 0        | 0        |
| 0        | 0        |
| 0        | 0        |
| 0        | 0        |
| 17.53419 | 11.94149 |
| 11.29158 | 7.967485 |
| 11.07578 | 7.2328   |
| 0        | 0        |
| 0        | 0        |
| 0        | 0        |
| 0        | 0        |
| 9.61158  | 6.676306 |
| 8.768442 | 6.101932 |
| 0        | 0        |
| 0        | 0        |
| 0        | 0        |
| 19.20835 | 10.91178 |

|            |            |
|------------|------------|
| 21.27386   | 8.802103   |
| 0          | 0          |
| 0          | 0          |
| 0          | 0          |
| 0          | 0          |
| 2.76E-22   | 9.26E-36   |
| 0          | 0          |
| 0          | 0          |
| 11.4287    | 7.078548   |
| 11.59059   | 8.36673    |
| 0          | 0          |
| 0          | 0          |
| 0.5588834  | 0.3750828  |
| 10.27386   | 6.812713   |
| 0          | 0          |
| 0          | 0          |
| 0          | 0          |
| 1.788112   | 1.040186   |
| 4.67085    | 2.940558   |
| 0.03273471 | 0.01840531 |
| 0.2494773  | 0.1441836  |
| 0.2431672  | 0.1413598  |
| 1.754557   | 1.399541   |
| 1.235919   | 0.9635557  |
| 0.04440506 | 0.03208428 |
| 0.05931307 | 0.04280473 |
| 0          | 0          |
| 1.144247   | 0.9031967  |
| 0          | 0          |
| 0          | 0          |
| 0          | 0          |
| 0.1034497  | 0.07110706 |
| 0.07084282 | 0.04853425 |

|            |            |
|------------|------------|
| 0          | 0          |
| 0          | 0          |
| 0.08949739 | 0.06322779 |
| 0          | 0          |
| 0.04851165 | 0.03544472 |
| 0.04972901 | 0.03546941 |
| 0          | 0          |
| 0.0489866  | 0.03362829 |
| 0          | 0          |
| 0.06604351 | 0.04305617 |
| 0.07066862 | 0.04830144 |
| 0          | 0          |
| 0.1176629  | 0.08188123 |
| 0          | 0          |
| 0.04548245 | 0.03368111 |
| 0          | 0          |
| 0          | 0          |
| 0          | 0          |
| 0.1328223  | 0.09280864 |
| 0          | 0          |
| 0          | 0          |
| 0          | 0          |
| 0          | 0          |
| 0.07023049 | 0.05037362 |
| 0          | 0          |
| 0          | 0          |
| 0          | 0          |
| 0          | 0          |
| 0          | 0          |
| 0          | 0          |
| 0          | 0          |
| 0.05930163 | 0.03945192 |
| 0          | 0          |
| 0.05277146 | 0.03581574 |



|            |            |
|------------|------------|
| 0          | 0          |
| 5.772974   | 3.358272   |
| 14.18997   | 8.93335    |
| 0.3132219  | 0.1761111  |
| 0.08823061 | 0.05099227 |
| 2.461899   | 1.43117    |
| 17.20211   | 13.72144   |
| 6.188707   | 4.824884   |
| 0.0490202  | 0.03541888 |
| 0.01640374 | 0.01183816 |
| 0.03261088 | 0.02346765 |
| 15.385     | 12.14396   |
| 0.06558493 | 0.04902298 |
| 4.65E-23   | 3.57E-45   |
| 0          | 0          |
| 0          | 0          |
| 1.82E-15   | 4.50E-30   |
| 4.99E-17   | 6.78E-31   |
| 0          | 0          |
| 6.43E-20   | 1.51E-35   |
| 8.17E-22   | 4.30E-42   |
| 9.46E-31   | 7.24E-63   |
| 1.18E-16   | 8.09E-30   |
| 1.07E-16   | 2.07E-32   |
| 8.84E-17   | 4.94E-32   |
| 1.72E-15   | 1.64E-29   |
| 4.88E-17   | 7.66E-29   |
| 0          | 0          |
| 0          | 0          |
| 0.2582177  | 0.1796929  |
| 1.30E-18   | 2.22E-32   |
| 8.31E-15   | 3.66E-28   |
| 5.22E-33   | 4.93E-66   |









|            |            |
|------------|------------|
| 0          | 0          |
| 0.759581   | 0.4992333  |
| 7.73E-13   | 8.09E-25   |
| 0.3307676  | 0.222902   |
| 1.02E-12   | 2.54E-24   |
| 0.2647849  | 0.1828107  |
| 1.91E-18   | 8.22E-36   |
| 1.014718   | 0.6540212  |
| 0.8134261  | 0.5627221  |
| 0.417219   | 0.2516303  |
| 0.3348823  | 0.2342214  |
| 0.3138117  | 0.2045426  |
| 1.71E-14   | 1.44E-28   |
| 2.126218   | 0.6227856  |
| 1.638971   | 1.014181   |
| 1.01E-10   | 3.43E-12   |
| 0          | 0          |
| 1.61E-14   | 1.74E-25   |
| 0.08546523 | 0.05968888 |
| 5.76E-15   | 2.70E-29   |
| 5.66E-11   | 4.67E-19   |
| 0.3599847  | 0.25045    |
| 2.17E-13   | 8.77E-23   |
| 1.49E-13   | 1.41E-26   |
| 0          | 0          |
| 4.62E-05   | 7.55E-07   |
| 0.5682599  | 0.2569161  |
| 1.138256   | 0.7383142  |
| 1.919358   | 0.7597713  |
| 1.143469   | 0.737225   |
| 0.3038398  | 0.2094138  |
| 1.48E-05   | 9.76E-06   |
| 1.167628   | 0.7718423  |

|             |            |
|-------------|------------|
| 3.21E-14    | 4.91E-23   |
| 1.104832    | 0.4450315  |
| 1.08E-15    | 2.89E-29   |
| 1.183628    | 0.3075042  |
| 0.3962841   | 0.2411181  |
| 7.735568    | 3.317826   |
| 9.378077    | 3.624736   |
| 24.24779    | 10.81926   |
| 0.4817944   | 0.3840019  |
| 1.785803    | 1.076946   |
| 3.479879    | 2.226754   |
| 4.565981    | 2.713037   |
| 1.782906    | 1.17532    |
| 0.355679    | 0.2407553  |
| 2.82E-06    | 8.51E-10   |
| 2.30E-07    | 1.82E-09   |
| 3.39E-06    | 8.22E-09   |
| 5.98E-06    | 1.59E-09   |
| 0.08103396  | 0.05551618 |
| 0           | 0          |
| 0           | 0          |
| 0.05015689  | 0.03543441 |
| 2.20E-06    | 1.62E-12   |
| 5.80E-05    | 3.79E-09   |
| 2.58E-14    | 4.29E-27   |
| 0.002427897 | 1.75E-06   |
| 2.82E-17    | 3.15E-29   |
| 4.73E-08    | 2.92E-09   |
| 2.31E-16    | 1.74E-31   |
| 4.57E-11    | 1.29E-16   |
| 1.15E-05    | 5.87E-11   |
| 8.08E-13    | 0          |
| 1.02E-18    | 6.04E-33   |

|              |             |
|--------------|-------------|
| 0.0453143    | 0.03091459  |
| 0.0002459841 | 2.58E-08    |
| 1.73E-14     | 2.01E-27    |
| 2.30E-06     | 3.29E-12    |
| 1.86E-09     | 8.16E-18    |
| 2.37E-15     | 2.14E-29    |
| 0.1004558    | 0.05384896  |
| 1.67E-12     | 2.75E-22    |
| 0.02322576   | 0.005723184 |
| 0.2358055    | 0.1691342   |
| 1.70E-06     | 5.57E-13    |
| 0            | 0           |
| 1.97E-14     | 1.47E-28    |
| 1.55E-10     | 3.44E-18    |
| 0.0001875776 | 0.000127754 |
| 1.66E-07     | 1.84E-14    |
| 8.38E-16     | 2.12E-25    |
| 1.14E-06     | 3.78E-12    |
| 0.0005894705 | 2.39E-07    |
| 0.03013231   | 0.02196412  |
| 45.32291     | 23.15813    |
| 45.90324     | 24.99188    |
| 69.47026     | 35.29096    |
| 48.87722     | 24.82915    |
| 39.14018     | 19.34993    |
| 44.55392     | 33.41726    |
| 47.51948     | 34.65901    |
| 49.04996     | 32.99404    |
| 52.28881     | 35.3858     |
| 46.98986     | 31.71381    |
| 53.37728     | 39.29238    |
| 31.35265     | 18.61904    |
| 4.80E-06     | 9.78E-11    |



|              |           |
|--------------|-----------|
| 2.20E-05     | 3.05E-10  |
| 0.0001100519 | 5.79E-09  |
| 28.07632     | 18.48661  |
| 26.70493     | 16.90196  |
| 29.93852     | 16.22216  |
| 5.83E-05     | 7.11E-10  |
| 23.29915     | 16.08601  |
| 2.76E-09     | 3.04E-18  |
| 1.91E-09     | 8.68E-19  |
| 26.12727     | 18.12511  |
| 3.46E-08     | 1.40E-15  |
| 0.0001355109 | 8.95E-09  |
| 24.08865     | 15.54863  |
| 0.0009040885 | 8.18E-07  |
| 1.03E-14     | 5.62E-27  |
| 4.74E-07     | 1.36E-13  |
| 25.2853      | 17.57219  |
| 1.28E-13     | 6.78E-27  |
| 9.87E-06     | 4.21E-11  |
| 0.001036675  | 2.71E-07  |
| 22.0197      | 15.48144  |
| 21.22795     | 14.79017  |
| 27.45308     | 18.90977  |
| 33.93286     | 18.9259   |
| 1.31E-05     | 2.22E-10  |
| 1.037813     | 0.4438687 |
| 26.68628     | 16.48535  |
| 29.29805     | 16.84602  |
| 27.83934     | 16.67333  |
| 27.80965     | 20.05165  |
| 24.73922     | 16.96271  |
| 36.685       | 20.39548  |
| 28.43612     | 18.13739  |

|            |             |
|------------|-------------|
| 25.37825   | 16.88329    |
| 30.55267   | 17.94632    |
| 0.7915384  | 0.1741021   |
| 7.89E-07   | 2.33E-13    |
| 0.06926006 | 0.03376322  |
| 0.1287414  | 0.06762409  |
| 0.09031577 | 0.04442394  |
| 0.03158392 | 0.0130136   |
| 0.118044   | 0.05977672  |
| 0.1363389  | 0.1057533   |
| 0.1098726  | 0.08024885  |
| 0.04320513 | 0.03090718  |
| 0.04124395 | 0.02812558  |
| 0.05455493 | 0.03604573  |
| 0.1281174  | 0.09902747  |
| 0.02748935 | 0.01098348  |
| 0.02806002 | 0.01385935  |
| 0.04094574 | 0.02105434  |
| 0.03016714 | 0.01519107  |
| 0.04810422 | 0.02195391  |
| 0.02015291 | 0.009501638 |
| 0.03000698 | 0.0176248   |
| 0.03778819 | 0.01519504  |
| 0.0361191  | 0.01765193  |
| 0.04701611 | 0.02270443  |
| 0.0272878  | 0.01470257  |
| 0.03899648 | 0.0158541   |
| 0.02737791 | 0.01576764  |
| 0.07339681 | 0.04096416  |
| 0.05244733 | 0.03116218  |
| 0.03269048 | 0.01849824  |
| 0.04242452 | 0.02113176  |
| 0.04361312 | 0.01774943  |

|            |             |
|------------|-------------|
| 0.03932221 | 0.01847564  |
| 0.01879532 | 0.01012761  |
| 0.01603358 | 0.009688071 |
| 0.05483366 | 0.03181425  |
| 0.03504636 | 0.01794765  |
| 0.03184601 | 0.0138164   |
| 0.03083549 | 0.01578956  |
| 0.04160677 | 0.02006062  |
| 0.02725672 | 0.0141803   |
| 0.04270249 | 0.02087762  |
| 0.03987476 | 0.02022901  |
| 0.0563897  | 0.02754347  |
| 0.01888115 | 0.007769712 |
| 0.04742861 | 0.02643939  |
| 0.02479848 | 0.01394796  |
| 0.06212014 | 0.03390144  |
| 0.03429451 | 0.01363355  |
| 0.02904022 | 0.01298205  |
| 0.03323228 | 0.0161788   |
| 0.02961282 | 0.0126596   |
| 0.02915586 | 0.01725009  |
| 0.2644223  | 0.149616    |
| 0.3900828  | 0.1942568   |
| 2.10374    | 0.8634551   |
| 4.351074   | 1.792337    |
| 4.439094   | 2.11068     |
| 0.09359774 | 0.07198814  |
| 0.05995078 | 0.04665805  |
| 0.7594378  | 0.5042795   |
| 0.7953924  | 0.5500293   |
| 1.018272   | 0.5437706   |
| 0.08967026 | 0.07029061  |
| 2.26E-06   | 1.82E-12    |

|            |           |
|------------|-----------|
| 2.66E-12   | 1.72E-23  |
| 4.04E-13   | 3.26E-24  |
| 1.37E-13   | 9.02E-27  |
| 8.82E-11   | 1.37E-20  |
| 1.10E-12   | 1.33E-23  |
| 7.46E-14   | 3.19E-26  |
| 2.31E-13   | 2.12E-25  |
| 1.31E-13   | 1.50E-25  |
| 9.39E-11   | 1.58E-20  |
| 0.04563135 | 0.0324856 |
| 4.98E-12   | 9.43E-22  |
| 4.65E-09   | 1.59E-17  |
| 5.45E-13   | 8.06E-25  |
| 2.86E-12   | 1.30E-23  |
| 2.66E-11   | 7.19E-22  |
| 1.60E-13   | 3.61E-25  |
| 5.99E-13   | 3.33E-25  |
| 1.38E-13   | 7.56E-26  |
| 1.70E-13   | 5.39E-26  |
| 5.64E-11   | 1.86E-20  |
| 2.23E-13   | 4.69E-24  |
| 6.10E-12   | 5.91E-23  |
| 4.30E-13   | 7.52E-24  |
| 2.72E-11   | 8.62E-21  |
| 6.97E-13   | 2.36E-23  |
| 5.85E-13   | 3.21E-25  |
| 2.58E-13   | 4.58E-26  |
| 1.06E-12   | 2.61E-24  |
| 3.24E-13   | 1.80E-25  |
| 1.93E-11   | 1.44E-21  |
| 4.58E-11   | 4.84E-21  |
| 1.28E-13   | 6.01E-24  |
| 2.32E-12   | 1.36E-22  |

|          |          |
|----------|----------|
| 9.06E-13 | 2.60E-24 |
| 2.32E-14 | 1.05E-24 |
| 9.89E-09 | 8.73E-17 |
| 1.93E-13 | 1.08E-24 |
| 1.78E-10 | 3.23E-19 |
| 7.231372 | 3.803299 |
| 10.34593 | 5.934351 |
| 14.34628 | 7.556329 |
| 42.4878  | 23.68045 |
| 15.04017 | 8.060049 |
| 7.657232 | 6.019819 |
| 7.687237 | 5.800643 |
| 42.06323 | 29.90578 |
| 43.17509 | 30.73926 |
| 37.37564 | 26.56648 |
| 8.347122 | 6.331308 |
| 3.456943 | 2.348523 |
| 2.535902 | 1.413451 |
| 3.051256 | 1.939428 |
| 1.999056 | 1.133922 |
| 3.532435 | 1.994968 |
| 3.508646 | 1.90294  |
| 2.238797 | 1.101399 |
| 3.224776 | 1.818729 |
| 2.339592 | 1.332425 |
| 2.132275 | 1.389266 |
| 2.409859 | 1.351179 |
| 2.056575 | 1.256791 |
| 1.821135 | 1.05175  |
| 2.192806 | 1.295351 |
| 4.320253 | 2.493655 |
| 4.87012  | 2.774003 |
| 3.820607 | 2.20484  |

|            |            |
|------------|------------|
| 3.263684   | 2.098685   |
| 2.1354     | 1.193908   |
| 1.580078   | 1.005591   |
| 2.589295   | 1.708902   |
| 1.777657   | 0.9602478  |
| 1.834877   | 1.14872    |
| 3.648835   | 2.391924   |
| 2.227191   | 1.319599   |
| 2.584452   | 1.568645   |
| 3.039619   | 1.773746   |
| 2.663158   | 1.710984   |
| 3.014609   | 1.969887   |
| 1.977818   | 1.332495   |
| 2.391853   | 1.51923    |
| 2.214234   | 1.406529   |
| 2.373572   | 1.409411   |
| 3.469404   | 1.94332    |
| 2.347327   | 1.418818   |
| 2.182503   | 1.189403   |
| 3.223726   | 1.868207   |
| 1.971071   | 1.191532   |
| 3.855637   | 2.221453   |
| 0.05871608 | 0.03415649 |
| 0.169854   | 0.1018899  |
| 0.5587382  | 0.3136099  |
| 7.881869   | 3.280223   |
| 2.267637   | 1.314031   |
| 0.413671   | 0.3293047  |
| 0.2342568  | 0.175183   |
| 4.2761     | 3.087568   |
| 3.755362   | 2.707958   |
| 5.493415   | 3.953205   |
| 0.2407932  | 0.1900671  |

|           |           |
|-----------|-----------|
| 1.049992  | 0.6044955 |
| 3.20E-14  | 1.74E-22  |
| 4.11E-13  | 3.03E-20  |
| 0.6588724 | 0.2978363 |
| 1.395187  | 0.5717397 |
| 0         | 0         |
| 1.733208  | 0.6670066 |
| 1.562652  | 0.5179814 |
| 3.872974  | 1.431462  |
| 0.5138151 | 0.3564842 |
| 0.5924101 | 0.4200064 |
| 0.7756904 | 0.5381216 |
| 0.6129982 | 0.416559  |
| 3.59E-16  | 7.76E-29  |
| 2.73E-15  | 1.26E-28  |
| 0.4222724 | 0.2828711 |
| 3.80E-17  | 5.01E-30  |
| 3.59E-12  | 4.17E-21  |
| 1.146748  | 0.5238522 |
| 4.83E-15  | 8.10E-27  |
| 4.05E-16  | 3.14E-31  |
| 5.64E-10  | 7.92E-19  |
| 0.3877382 | 0.2625459 |
| 0.5730302 | 0.4002793 |
| 0.8243623 | 0.5735289 |
| 1.302368  | 0.8767958 |
| 0.6020567 | 0.4061514 |
| 3.753643  | 1.338852  |
| 8.58E-16  | 4.55E-28  |
| 1.01E-13  | 1.86E-24  |
| 9.86E-16  | 5.62E-30  |
| 0.8326935 | 0.3127262 |
| 1.78E-15  | 4.57E-28  |

|           |           |
|-----------|-----------|
| 1.29482   | 0.8493207 |
| 3.56E-12  | 1.72E-18  |
| 0.8436385 | 0.5609727 |
| 5.72E-14  | 4.32E-27  |
| 4.44E-15  | 3.24E-20  |
| 1.52E-11  | 1.34E-16  |
| 1.585287  | 0.9045568 |
| 1.780925  | 1.074971  |
| 2.343634  | 1.180968  |
| 2.504721  | 1.346598  |
| 2.537368  | 1.399044  |
| 1.40607   | 1.096416  |
| 1.132242  | 0.8827265 |
| 1.200274  | 0.8672415 |
| 1.468079  | 1.059475  |
| 0.9019415 | 0.6490608 |
| 1.301899  | 1.027638  |
| 4.24E-10  | 2.52E-19  |
| 5.31E-12  | 4.68E-22  |
| 4.37E-14  | 5.14E-27  |
| 3.38E-15  | 4.24E-29  |
| 7.97E-14  | 1.18E-22  |
| 1.75E-14  | 3.85E-27  |
| 8.74E-16  | 6.21E-29  |
| 1.63E-13  | 8.31E-21  |
| 2.38E-17  | 3.44E-32  |
| 8.01E-14  | 4.17E-21  |
| 9.82E-15  | 5.89E-27  |
| 1.82E-16  | 2.65E-27  |
| 1.54E-15  | 1.19E-29  |
| 6.56E-13  | 9.98E-18  |
| 9.78E-15  | 2.93E-28  |
| 3.21E-13  | 5.05E-25  |



|           |           |
|-----------|-----------|
| 4.37E-16  | 2.55E-27  |
| 7.10E-16  | 7.70E-26  |
| 2.74E-15  | 9.42E-30  |
| 2.87E-17  | 1.01E-31  |
| 1.26E-15  | 7.65E-27  |
| 7.38E-17  | 7.30E-31  |
| 9.47E-17  | 6.10E-29  |
| 9.30E-15  | 2.68E-27  |
| 1.03E-15  | 1.57E-29  |
| 1.11E-21  | 3.07E-33  |
| 3.52E-16  | 4.03E-28  |
| 1.13E-14  | 7.67E-27  |
| 4.65E-14  | 2.63E-27  |
| 0         | 0         |
| 6.15E-16  | 5.46E-26  |
| 8.64E-16  | 1.78E-30  |
| 3.05E-10  | 8.01E-17  |
| 4.17E-16  | 2.71E-27  |
| 2.26E-14  | 8.14E-26  |
| 2.58E-16  | 1.52E-19  |
| 5.51E-15  | 1.05E-28  |
| 3.09E-15  | 6.98E-16  |
| 0.2252606 | 0.1791142 |
| 64.26824  | 33.82803  |
| 29.96677  | 16.06085  |
| 44.86408  | 22.31345  |
| 57.57289  | 28.83762  |
| 46.24242  | 23.60114  |
| 31.54161  | 23.21067  |
| 41.31142  | 29.91409  |
| 25.95341  | 17.0785   |
| 36.31243  | 24.35308  |
| 17.84348  | 11.53276  |

|              |           |
|--------------|-----------|
| 30.37138     | 22.16502  |
| 14.19159     | 7.211742  |
| 6.506615     | 2.761361  |
| 5.933457     | 2.736999  |
| 2.156567     | 0.5985229 |
| 7.026419     | 3.077684  |
| 8.262511     | 3.994444  |
| 8.076683     | 3.129874  |
| 14.66094     | 7.327782  |
| 4.001434     | 1.726211  |
| 2.280095     | 0.7687996 |
| 10.51823     | 5.322815  |
| 0.0005917213 | 2.13E-07  |
| 14.45449     | 6.58872   |
| 3.059153     | 1.309803  |
| 14.33465     | 5.802182  |
| 7.283885     | 2.487539  |
| 3.968333     | 1.406888  |
| 9.468807     | 4.583748  |
| 14.81224     | 7.097047  |
| 1.04E-10     | 5.27E-21  |
| 25.09106     | 13.89139  |
| 7.530743     | 2.994755  |
| 1.923584     | 0.6373807 |
| 1.33E-09     | 1.94E-18  |
| 8.265449     | 3.553647  |
| 5.436081     | 2.445519  |
| 4.491319     | 1.803333  |
| 4.127508     | 1.822673  |
| 4.328597     | 1.867767  |
| 2.973946     | 1.110173  |
| 18.06977     | 9.664253  |
| 1.664443     | 0.547737  |

|          |           |
|----------|-----------|
| 5.237451 | 1.482692  |
| 3.198706 | 1.177058  |
| 1.09E-09 | 2.11E-17  |
| 1.389997 | 0.5943224 |
| 4.49E-12 | 8.23E-23  |
| 3.582189 | 1.259499  |
| 5.80E-08 | 2.22E-15  |
| 386.7807 | 218.5729  |
| 429.2742 | 269.9179  |
| 548.147  | 307.2742  |
| 72.35408 | 37.09624  |
| 175.3301 | 101.9143  |
| 188.1834 | 150.086   |
| 168.2049 | 131.1371  |
| 46.82536 | 33.83302  |
| 48.75788 | 35.18731  |
| 49.43773 | 35.22814  |
| 195.29   | 152.696   |
| 45.77565 | 24.11185  |
| 4.30E-19 | 6.37E-34  |
| 2.07E-15 | 4.54E-25  |
| 2.14E-16 | 6.24E-33  |
| 1.23E-15 | 2.12E-30  |
| 3.84E-16 | 4.06E-30  |
| 1.48E-16 | 2.97E-31  |
| 8.62E-17 | 3.27E-25  |
| 5.38E-16 | 3.03E-31  |
| 8.07E-16 | 4.59E-27  |
| 2.91E-16 | 9.96E-32  |
| 1.65E-16 | 4.41E-32  |
| 2.32E-16 | 1.47E-29  |
| 3.17E-16 | 2.09E-31  |
| 1.04E-15 | 3.02E-31  |

|          |          |
|----------|----------|
| 1.52E-16 | 1.61E-30 |
| 55.29575 | 36.28422 |
| 53.68449 | 30.85349 |
| 1.63E-14 | 8.70E-22 |
| 4.39E-16 | 2.11E-31 |
| 1.42E-16 | 3.75E-32 |
| 1.52E-17 | 1.27E-32 |
| 1.99E-16 | 2.79E-31 |
| 1.16E-14 | 8.86E-30 |
| 3.66E-16 | 4.86E-31 |
| 4.44E-14 | 6.31E-22 |
| 56.70151 | 29.98285 |
| 7.259715 | 4.927932 |
| 6.76E-16 | 8.86E-30 |
| 1.94E-13 | 1.27E-26 |
| 28.75783 | 20.43903 |
| 60.8904  | 35.96329 |
| 2.38E-15 | 1.17E-30 |
| 8.16E-16 | 2.96E-26 |
| 80.04541 | 45.76144 |
| 7.04E-14 | 2.17E-26 |
| 7.45E-17 | 1.26E-31 |
| 5.46E-17 | 3.23E-31 |
| 6.78E-16 | 3.22E-31 |
| 21.03917 | 11.01274 |
| 23.21866 | 14.26777 |
| 34.86677 | 18.44366 |
| 45.65371 | 24.84472 |
| 39.47777 | 21.1055  |
| 13.76075 | 10.50233 |
| 16.30223 | 12.53228 |
| 39.73524 | 28.46954 |
| 41.48019 | 29.73621 |

|             |             |
|-------------|-------------|
| 40.58781    | 28.83256    |
| 15.77995    | 12.45489    |
| 35.7866     | 23.00602    |
| 3.47592     | 1.44017     |
| 5.57409     | 2.977696    |
| 3.137836    | 1.606103    |
| 1.925805    | 0.9656274   |
| 4.168555    | 2.502473    |
| 9.57E-12    | 3.70E-21    |
| 0.003386336 | 0.000183239 |
| 4.18E-11    | 3.59E-20    |
| 2.157138    | 0.7761451   |
| 1.921368    | 1.178728    |
| 1.506095    | 0.8591683   |
| 3.84E-12    | 2.13E-22    |
| 2.455135    | 1.26685     |
| 1.697392    | 0.9452635   |
| 3.241186    | 1.680153    |
| 19.47803    | 12.12262    |
| 24.39617    | 16.26025    |
| 2.07E-14    | 3.19E-26    |
| 1.55E-14    | 1.09E-26    |
| 2.443092    | 1.141637    |
| 1.60E-14    | 1.10E-26    |
| 2.65E-13    | 1.45E-24    |
| 7.99E-13    | 5.41E-24    |
| 3.404008    | 1.314083    |
| 3.560646    | 1.943638    |
| 30.887      | 19.91213    |
| 2.00016     | 0.5043437   |
| 4.388102    | 2.42748     |
| 5.444086    | 2.678339    |
| 28.10716    | 17.78528    |









|           |           |
|-----------|-----------|
| 0         | 0         |
| 0         | 0         |
| 0         | 0         |
| 0         | 0         |
| 0         | 0         |
| 0         | 0         |
| 0         | 0         |
| 0         | 0         |
| 0         | 0         |
| 0         | 0         |
| 3.25334   | 1.05528   |
| 2.016655  | 0.8437191 |
| 6.814081  | 3.40127   |
| 13.55749  | 6.466225  |
| 6.967084  | 2.973213  |
| 1.958073  | 0.8851771 |
| 1.437229  | 0.8771941 |
| 11.93713  | 7.159858  |
| 10.574    | 6.221138  |
| 8.217009  | 4.705614  |
| 1.198543  | 0.7466639 |
| 6.623982  | 3.454418  |
| 2.932495  | 0.9725692 |
| 0.3459974 | 0.2282641 |
| 1.090185  | 0.2066634 |
| 6.649818  | 2.134094  |
| 2.685764  | 0.8899448 |
| 1.39E-12  | 1.18E-26  |
| 0.5035725 | 0.3213885 |
| 3.734044  | 1.480257  |
| 0.3587563 | 0.2241877 |
| 6.56E-10  | 1.23E-19  |
| 6.40E-10  | 1.63E-18  |
| 1.31E-16  | 1.13E-32  |





|            |            |
|------------|------------|
| 0          | 0          |
| 0          | 0          |
| 0          | 0          |
| 0          | 0          |
| 0          | 0          |
| 0          | 0          |
| 0          | 0          |
| 0          | 0          |
| 0          | 0          |
| 0          | 0          |
| 0          | 0          |
| 0.0574894  | 0.03344291 |
| 0.2276234  | 0.1433015  |
| 0.05143338 | 0.02891875 |
| 0          | 0          |
| 0.3135374  | 0.182268   |
| 0.02205253 | 0.01759043 |
| 0.04469839 | 0.03484808 |
| 0          | 0          |
| 0          | 0          |
| 0          | 0          |
| 0.1165545  | 0.09200087 |
| 0.2803831  | 0.2095995  |
| 0          | 0          |
| 0          | 0          |
| 0          | 0          |
| 0.3211548  | 0.2200224  |
| 0          | 0          |
| 0.09148476 | 0.06165451 |
| 0.3624672  | 0.2560745  |
| 0          | 0          |
| 0.3102323  | 0.2266691  |
| 0          | 0          |
| 0.4462721  | 0.3095934  |

|           |           |
|-----------|-----------|
| 0         | 0         |
| 0.3252679 | 0.2274969 |
| 0         | 0         |
| 0         | 0         |
| 0.328158  | 0.227942  |
| 0.276141  | 0.1921657 |
| 0.3921986 | 0.2725639 |
| 0.3632324 | 0.2689844 |
| 0.378917  | 0.2714276 |
| 0.5138642 | 0.3588826 |
| 0         | 0         |
| 0.4227376 | 0.2953849 |
| 0.3017728 | 0.2099507 |
| 0.2404244 | 0.1669664 |
| 0.3382186 | 0.244374  |
| 0.6494722 | 0.4409894 |
| 0.3337219 | 0.2393658 |
| 0         | 0         |
| 0.4035713 | 0.2933113 |
| 0.3903311 | 0.2817627 |
| 0         | 0         |
| 0.4299084 | 0.2963219 |
| 0.5133902 | 0.344551  |
| 0.196044  | 0.1304233 |
| 0         | 0         |
| 0         | 0         |
| 0         | 0         |
| 10.15079  | 5.112963  |
| 23.909    | 13.71906  |
| 14.83396  | 7.142572  |
| 8.635136  | 3.924324  |
| 39.46507  | 21.43276  |
| 13.31647  | 10.46274  |

|            |            |
|------------|------------|
| 8.102953   | 6.145215   |
| 6.943392   | 5.01521    |
| 7.085996   | 4.917725   |
| 5.944291   | 4.097299   |
| 11.87395   | 8.747135   |
| 2.63807    | 1.000642   |
| 0.06298262 | 0.04273171 |
| 0.05897072 | 0.04022399 |
| 3.92E-16   | 6.41E-31   |
| 4.66E-10   | 1.01E-15   |
| 2.36E-14   | 4.85E-17   |
| 0.1339321  | 0.09026112 |
| 3.56E-15   | 6.73E-29   |
| 2.62E-14   | 4.28E-27   |
| 0.1129405  | 0.08251085 |
| 0.05441094 | 0.03880881 |
| 0.1633027  | 0.1132715  |
| 2.37E-10   | 1.61E-16   |
| 1.16E-07   | 8.11E-08   |
| 1.05E-14   | 4.48E-28   |
| 1.52E-11   | 1.37E-20   |
| 3.730868   | 1.838081   |
| 2.789262   | 1.130401   |
| 2.04E-10   | 1.41E-20   |
| 2.20E-13   | 2.69E-27   |
| 5.20E-10   | 4.76E-19   |
| 1.66E-15   | 1.36E-29   |
| 1.12E-10   | 3.72E-20   |
| 2.10E-11   | 3.18E-20   |
| 3.93E-13   | 1.85E-24   |
| 1.83E-09   | 6.41E-17   |
| 3.491868   | 1.367472   |
| 3.240619   | 1.112376   |

|             |             |
|-------------|-------------|
| 3.95E-07    | 1.06E-07    |
| 1.25E-12    | 1.46E-23    |
| 3.671956    | 1.725745    |
| 4.029626    | 1.596732    |
| 0.000175646 | 2.36E-07    |
| 0.07268063  | 0.0497102   |
| 4.126144    | 1.967055    |
| 0.1991505   | 0.1324899   |
| 0.2476294   | 0.05091638  |
| 1.62E-10    | 1.33E-20    |
| 0.008465517 | 9.52E-05    |
| 1.53E-17    | 2.38E-30    |
| 0.01588492  | 0.01000043  |
| 2.21E-19    | 3.51E-34    |
| 3.43E-17    | 2.22E-32    |
| 0.1437367   | 0.08345288  |
| 0.00508663  | 0.004057403 |
| 0.03083763  | 0.02404185  |
| 6.99E-24    | 1.07E-42    |
| 6.19E-24    | 1.05E-42    |
| 1.38E-21    | 2.38E-39    |
| 0.01527204  | 0.01203531  |
| 8.78E-16    | 6.62E-28    |
| 5.96E-13    | 4.74E-24    |
| 5.58E-17    | 3.60E-31    |
| 3.84E-14    | 1.73E-21    |
| 7.73E-09    | 1.47E-16    |
| 7.03E-17    | 6.80E-32    |
| 9.71E-13    | 2.16E-21    |
| 1.32E-16    | 7.11E-30    |
| 5.27E-12    | 7.21E-22    |
| 5.66E-17    | 1.60E-30    |
| 7.51E-15    | 2.60E-24    |

|            |            |
|------------|------------|
| 4.05E-14   | 3.13E-28   |
| 6.77E-15   | 7.53E-25   |
| 2.74E-13   | 1.69E-24   |
| 1.10E-12   | 4.12E-24   |
| 3.62E-21   | 1.80E-29   |
| 9.10E-16   | 2.41E-29   |
| 4.25E-17   | 2.43E-29   |
| 1.23E-16   | 1.84E-29   |
| 7.89E-13   | 4.89E-22   |
| 2.99E-13   | 2.43E-21   |
| 1.70E-13   | 2.04E-24   |
| 0.01648223 | 0.01158821 |
| 7.28E-13   | 6.36E-18   |
| 4.06E-10   | 4.27E-16   |
| 1.71E-16   | 4.21E-26   |
| 2.76E-12   | 1.04E-23   |
| 3.52E-12   | 1.81E-23   |
| 2.51E-14   | 3.17E-25   |
| 2.97E-13   | 5.88E-23   |
| 6.39E-16   | 1.88E-30   |
| 1.26E-18   | 3.26E-32   |
| 1.29E-13   | 1.27E-23   |
| 6.61E-13   | 3.66E-24   |
| 5.59E-10   | 1.30E-18   |
| 2.01E-15   | 2.40E-23   |
| 4.01E-11   | 7.36E-18   |
| 2.09E-11   | 6.01E-19   |
| 1.37E-09   | 5.11E-14   |
| 5.01E-20   | 3.41E-36   |
| 2.61E-18   | 7.36E-35   |
| 0          | 0          |
| 0          | 0          |
| 0          | 0          |



|          |          |
|----------|----------|
| 0        | 0        |
| 0        | 0        |
| 0        | 0        |
| 0        | 0        |
| 0        | 0        |
| 0        | 0        |
| 1.01E-15 | 5.25E-29 |
| 8.67E-16 | 1.32E-28 |
| 7.80E-16 | 3.32E-26 |
| 7.67E-16 | 4.10E-30 |
| 2.26E-16 | 1.43E-30 |
| 6.68E-15 | 1.39E-28 |
| 1.20E-15 | 5.99E-29 |
| 2.26E-16 | 4.49E-30 |
| 5.53E-16 | 1.24E-29 |
| 1.95E-16 | 7.11E-30 |
| 2.72E-16 | 5.02E-30 |
| 1.24E-15 | 3.48E-27 |
| 4.16E-16 | 2.42E-27 |
| 2.57E-16 | 1.79E-29 |
| 3.44E-15 | 7.42E-29 |
| 1.78E-15 | 9.96E-29 |
| 1.38E-15 | 6.73E-29 |
| 1.39E-15 | 7.05E-30 |
| 7.40E-16 | 1.26E-25 |
| 1.15E-16 | 5.87E-30 |
| 1.58E-16 | 6.64E-30 |
| 2.23E-16 | 1.98E-31 |
| 1.04E-15 | 2.17E-29 |
| 7.77E-16 | 4.67E-29 |
| 9.39E-17 | 3.71E-30 |
| 5.22E-16 | 1.51E-27 |
| 3.64E-16 | 1.57E-28 |

|            |             |
|------------|-------------|
| 4.87E-16   | 3.43E-27    |
| 1.92E-13   | 1.31E-24    |
| 3.48E-17   | 3.31E-30    |
| 9.98E-15   | 8.55E-29    |
| 3.38E-17   | 1.96E-30    |
| 4.70E-16   | 7.78E-30    |
| 1.66E-15   | 2.13E-29    |
| 1.35E-17   | 8.12E-30    |
| 6.45E-16   | 5.00E-30    |
| 5.67E-16   | 1.67E-25    |
| 6.87E-17   | 1.39E-26    |
| 2.32E-15   | 4.03E-29    |
| 6.258105   | 3.334673    |
| 7.806588   | 4.500638    |
| 9.012843   | 4.707738    |
| 4.466095   | 2.281621    |
| 4.637175   | 2.417117    |
| 9.25381    | 7.165649    |
| 8.341641   | 6.272295    |
| 4.971051   | 3.386162    |
| 4.826512   | 3.327964    |
| 5.255902   | 3.645921    |
| 9.640982   | 7.331252    |
| 1.31E-12   | 1.73E-23    |
| 0.1152357  | 0.07635004  |
| 0.1335467  | 0.05642038  |
| 0.02574274 | 0.01147947  |
| 0.04069644 | 0.02606929  |
| 1.40E-12   | 2.15E-23    |
| 2.42E-13   | 9.11E-25    |
| 0.07164209 | 0.04071208  |
| 1.07E-12   | 2.66E-23    |
| 0.01361037 | 0.009845113 |

|            |             |
|------------|-------------|
| 3.19E-14   | 1.47E-26    |
| 2.11E-13   | 1.10E-24    |
| 7.94E-11   | 6.13E-20    |
| 0.1573197  | 0.0756576   |
| 0.02722496 | 0.01126754  |
| 1.86E-10   | 6.77E-19    |
| 3.21E-11   | 2.21E-20    |
| 0.01664113 | 0.01145292  |
| 0.116408   | 0.06014174  |
| 0.05388138 | 0.01961442  |
| 0.01706685 | 0.009343815 |
| 7.82E-12   | 1.03E-21    |
| 0.01975775 | 0.01040815  |
| 1.20E-11   | 2.33E-21    |
| 0.03225572 | 0.01857387  |
| 0.03788026 | 0.0105454   |
| 1.77E-10   | 1.53E-18    |
| 0.01657208 | 0.01071839  |
| 6.95E-13   | 5.51E-24    |
| 6.16E-11   | 1.02E-19    |
| 6.77E-11   | 2.56E-19    |
| 0.0140468  | 0.01005741  |
| 0.0386613  | 0.02326285  |
| 8.04E-12   | 1.31E-21    |
| 0.1662488  | 0.1098617   |
| 0.03324973 | 0.02186851  |
| 0.01460031 | 0.009527942 |
| 0.01559392 | 0.01058262  |
| 0.04572204 | 0.03586681  |
| 2.148472   | 1.249576    |
| 1.381071   | 0.7197297   |
| 0.1294141  | 0.07275907  |
| 0.1409379  | 0.08145409  |

|             |            |
|-------------|------------|
| 2.148691    | 1.211947   |
| 0.7289024   | 0.4211757  |
| 1.255076    | 0.897481   |
| 0.1460524   | 0.1055281  |
| 0.2076184   | 0.1498329  |
| 0.1842413   | 0.1242489  |
| 0.6456899   | 0.4989061  |
| 0.07653948  | 0.05721684 |
| 0.03788483  | 0.0223733  |
| 0.0960444   | 0.06551199 |
| 0.1091654   | 0.06379731 |
| 0           | 0          |
| 0.06116346  | 0.01453603 |
| 0.1065449   | 0.07180406 |
| 0.0868222   | 0.06133782 |
| 2.75E-06    | 1.02E-07   |
| 0.00154024  | 5.32E-05   |
| 0.0294409   | 0.02099883 |
| 0.000210021 | 9.19E-08   |
| 0.2280614   | 0.0983596  |
| 0.09385894  | 0.06564625 |
| 0           | 0          |
| 0.080479    | 0.05429002 |
| 0           | 0          |
| 0.03304687  | 0.02299722 |
| 0.0297388   | 0.02066739 |
| 0.03024361  | 0.02090419 |
| 0.02929452  | 0.02098439 |
| 0.02793723  | 0.01951135 |
| 0.03346491  | 0.02127276 |
| 7.51E-05    | 7.87E-09   |
| 0.1520663   | 0.09790724 |
| 0           | 0          |

|            |            |
|------------|------------|
| 0.1004561  | 0.07258277 |
| 0.03212267 | 0.02181119 |
| 7.75E-10   | 5.55E-10   |
| 0.07125921 | 0.02587467 |
| 0.396181   | 0.09690318 |
| 0.05919852 | 0.04270719 |
| 0.2309539  | 0.04933931 |
| 7.59E-07   | 1.13E-10   |
| 4.36E-15   | 2.07E-29   |
| 1.60E-08   | 1.06E-08   |
| 2.11E-18   | 7.67E-35   |
| 8.70E-05   | 2.89E-08   |
| 1.53E-16   | 2.03E-32   |
| 7.540741   | 3.741724   |
| 13.12175   | 7.115788   |
| 16.30194   | 8.333837   |
| 9.31484    | 4.649065   |
| 7.431686   | 3.579471   |
| 7.11645    | 5.351154   |
| 6.437462   | 4.692461   |
| 11.51096   | 7.876588   |
| 11.65443   | 8.343512   |
| 9.499297   | 6.559475   |
| 6.641348   | 5.018328   |
| 1.609434   | 0.9285499  |
| 9.05E-15   | 8.82E-26   |
| 9.89E-15   | 2.82E-26   |
| 2.17E-10   | 4.15E-19   |
| 7.60E-12   | 2.06E-20   |
| 4.65E-13   | 1.15E-25   |
| 5.97E-14   | 1.74E-25   |
| 5.46E-14   | 4.30E-26   |
| 7.64E-14   | 2.87E-26   |

|           |           |
|-----------|-----------|
| 1.20E-13  | 8.41E-27  |
| 1.670594  | 1.080596  |
| 7.70E-15  | 8.59E-27  |
| 3.98E-12  | 2.70E-22  |
| 3.10E-12  | 3.54E-23  |
| 8.18E-10  | 2.18E-16  |
| 2.93E-14  | 1.66E-25  |
| 0.3812801 | 0.1028074 |
| 3.362202  | 1.455999  |
| 2.54E-13  | 1.02E-25  |
| 6.59E-15  | 5.17E-26  |
| 1.96E-11  | 2.60E-21  |
| 1.38E-09  | 8.88E-19  |
| 2.60E-13  | 6.52E-26  |
| 3.36E-12  | 1.08E-23  |
| 9.83E-15  | 1.09E-26  |
| 9.80E-13  | 7.39E-23  |
| 1.17E-09  | 6.03E-18  |
| 3.15E-11  | 6.69E-21  |
| 1.95E-10  | 6.75E-20  |
| 1.62E-10  | 4.33E-17  |
| 3.638271  | 1.827822  |
| 2.445618  | 0.9769389 |
| 1.21E-10  | 7.72E-18  |
| 1.66E-13  | 1.28E-25  |
| 4.99E-13  | 9.01E-25  |
| 1.90E-13  | 1.22E-24  |
| 5.36E-14  | 1.96E-25  |
| 6.53E-14  | 6.46E-26  |
| 2.12E-10  | 9.68E-20  |
| 0         | 0         |
| 75.13786  | 0.616841  |
| 0         | 0         |

|              |            |
|--------------|------------|
| 3.31E-20     | 3.47E-35   |
| 0            | 0          |
| 0.2716232    | 0.2166596  |
| 0.8459328    | 0.6595121  |
| 0            | 0          |
| 0            | 0          |
| 0            | 0          |
| 1.904694     | 1.290869   |
| 3753.37      | 2.279119   |
| 2.02E-15     | 1.89E-30   |
| 1.01E-14     | 3.55E-29   |
| 3.49E-08     | 9.51E-16   |
| 0.0001106737 | 3.38E-07   |
| 0.0002637977 | 5.31E-07   |
| 1.455781     | 0.07049645 |
| 8.09E-09     | 3.59E-11   |
| 19.58356     | 4.354689   |
| 5.37E-16     | 1.01E-29   |
| 31.47975     | 0.4624422  |
| 4.88E-15     | 7.82E-30   |
| 2.20E-09     | 4.35E-19   |
| 5.96E-10     | 1.16E-17   |
| 0.7158014    | 0.01931005 |
| 9.92E-15     | 5.67E-30   |
| 8.90E-16     | 2.99E-29   |
| 6.84E-09     | 1.90E-13   |
| 7.72E-16     | 3.77E-28   |
| 9.53E-08     | 5.90E-19   |
| 3.82E-16     | 8.76E-32   |
| 2.84E-16     | 3.09E-29   |
| 1.03E-13     | 2.21E-27   |
| 7.57E-14     | 1.29E-27   |
| 7.24E-14     | 5.93E-28   |

|              |           |
|--------------|-----------|
| 2.51E-15     | 4.11E-30  |
| 6.57E-16     | 9.11E-31  |
| 3.55E-15     | 3.40E-29  |
| 3.59E-14     | 1.73E-28  |
| 5.14E-11     | 1.42E-18  |
| 5.19E-12     | 5.76E-25  |
| 0.0008719618 | 1.23E-05  |
| 6.83E-08     | 6.20E-15  |
| 4.85E-15     | 5.35E-30  |
| 7.65E-16     | 2.02E-31  |
| 1.70E-12     | 5.19E-24  |
| 6.32E-14     | 6.86E-25  |
| 5.61E-16     | 8.16E-29  |
| 1.57E-14     | 4.03E-30  |
| 71.74071     | 26.53199  |
| 73.29789     | 25.3275   |
| 45.96333     | 17.5293   |
| 34.72773     | 8.225654  |
| 56.89384     | 17.84293  |
| 15.70178     | 7.173593  |
| 15.51026     | 11.52368  |
| 3.872573     | 2.767087  |
| 5.935644     | 3.579211  |
| 1.202104     | 0.8625939 |
| 17.94376     | 11.19157  |
| 7.902616     | 5.803283  |
| 11.70495     | 7.941041  |
| 9.281338     | 4.940589  |
| 10.9527      | 7.354308  |
| 3.339913     | 2.288158  |
| 7.603751     | 3.36055   |
| 2.01E-05     | 4.88E-12  |
| 6.293994     | 2.432188  |



|              |           |
|--------------|-----------|
| 2.50E-12     | 4.15E-25  |
| 0.0002602289 | 1.38E-09  |
| 4.59E-10     | 2.82E-21  |
| 4.661239     | 3.160686  |
| 3.129249     | 1.654117  |
| 8.77E-07     | 7.68E-15  |
| 0.005168491  | 5.86E-07  |
| 3.824111     | 2.340394  |
| 6.494056     | 2.783382  |
| 5.31006      | 3.680577  |
| 0.01575484   | 3.09E-06  |
| 10.69115     | 7.669662  |
| 3.60E-09     | 7.32E-18  |
| 9.319826     | 6.108128  |
| 1.46E-11     | 5.78E-24  |
| 0.01935532   | 7.30E-06  |
| 4.007255     | 2.322402  |
| 17.49103     | 2.749414  |
| 9.197773     | 6.481321  |
| 14.16709     | 2.542898  |
| 9.965622     | 3.885089  |
| 8.23E-13     | 7.23E-27  |
| 1.40E-07     | 1.75E-14  |
| 2.294486     | 1.64226   |
| 5.174988     | 2.786855  |
| 20.77707     | 5.859398  |
| 1.483261     | 0.8238182 |
| 7.41262      | 0.4103161 |
| 4.590165     | 2.450811  |
| 17.31357     | 6.01816   |
| 0.0008883648 | 7.01E-08  |
| 14.95113     | 8.449892  |
| 20.04618     | 6.766548  |

|          |          |
|----------|----------|
| 4.558881 | 2.28097  |
| 12.72459 | 7.343597 |
| 25.86062 | 8.487955 |
| 8.560978 | 6.775024 |
| 6.283828 | 4.899042 |
| 2.108976 | 1.523812 |
| 4.266244 | 3.078839 |
| 2.172976 | 1.560521 |
| 8.133452 | 5.706018 |
| 3.151156 | 2.352649 |
| 3.59E-15 | 1.88E-28 |
| 7.04E-15 | 5.27E-29 |
| 2.71E-16 | 2.92E-32 |
| 4.93E-15 | 6.19E-30 |
| 3.22E-15 | 2.71E-29 |
| 2.47E-15 | 2.49E-30 |
| 2.92E-14 | 4.39E-27 |
| 1.17E-16 | 6.93E-31 |
| 6.27E-18 | 5.51E-32 |
| 1.76E-14 | 6.77E-29 |
| 1.20E-14 | 6.63E-27 |
| 7.81E-15 | 4.24E-28 |
| 5.70E-15 | 3.13E-29 |
| 4.34E-14 | 5.36E-28 |
| 6.53E-15 | 1.12E-29 |
| 7.479869 | 4.804248 |
| 13.86583 | 9.013568 |
| 5.12E-14 | 1.31E-28 |
| 8.55E-14 | 7.81E-26 |
| 2.21E-15 | 3.89E-29 |
| 5.32E-16 | 9.02E-32 |
| 1.43E-15 | 4.60E-31 |
| 1.02E-14 | 1.31E-24 |

|           |           |
|-----------|-----------|
| 1.31E-14  | 2.93E-29  |
| 8.02E-16  | 3.50E-31  |
| 13.8992   | 5.928272  |
| 4.40E-14  | 1.82E-24  |
| 8.90E-15  | 2.11E-28  |
| 8.35E-15  | 8.26E-28  |
| 17.19367  | 6.814042  |
| 15.23513  | 6.102944  |
| 4.98E-15  | 0         |
| 2.61E-10  | 1.79E-18  |
| 16.47204  | 10.90799  |
| 7.48E-15  | 7.14E-30  |
| 1.40E-15  | 1.28E-30  |
| 7.51E-10  | 1.33E-17  |
| 7.60E-13  | 1.74E-23  |
| 19.55279  | 9.827272  |
| 24.42045  | 13.39921  |
| 22.42356  | 12.53261  |
| 21.75772  | 12.57289  |
| 23.20416  | 13.27286  |
| 3.53451   | 2.819339  |
| 3.521484  | 2.745444  |
| 4.810671  | 3.475885  |
| 5.950598  | 4.294395  |
| 2.716894  | 1.955148  |
| 5.016275  | 3.761023  |
| 4.674296  | 3.270285  |
| 3.270495  | 2.21893   |
| 0.3956469 | 0.2688071 |
| 4.292391  | 2.393309  |
| 3.959653  | 2.46961   |
| 0         | 0         |
| 0.4510819 | 0.3039985 |

|           |           |
|-----------|-----------|
| 1.921892  | 1.300091  |
| 5.209958  | 1.766182  |
| 2.337584  | 1.655845  |
| 1.59E-13  | 6.21E-25  |
| 5.06E-09  | 2.75E-18  |
| 5.770144  | 2.765168  |
| 9.781986  | 4.516417  |
| 0.8942193 | 0.5829741 |
| 1.07E-12  | 2.83E-24  |
| 2.57E-12  | 1.97E-23  |
| 0.4212437 | 0.2931422 |
| 1.14E-12  | 1.63E-25  |
| 10.15713  | 4.386054  |
| 8.431719  | 3.663943  |
| 6.776219  | 4.638938  |
| 0.8276883 | 0.5805462 |
| 2.54E-07  | 1.91E-15  |
| 7.414313  | 2.806245  |
| 4.781777  | 2.094017  |
| 5.995786  | 1.560667  |
| 1.82229   | 1.237329  |
| 4.631335  | 3.227268  |
| 0.5103292 | 0.3517618 |
| 0.5536002 | 0.4023507 |
| 5.693151  | 3.69538   |
| 2.18E-13  | 2.33E-25  |
| 4.45E-14  | 1.31E-23  |
| 5.780712  | 3.818906  |
| 2.252556  | 1.49857   |
| 1.91E-13  | 2.28E-24  |
| 5.876938  | 3.988651  |
| 1.26E-12  | 7.45E-25  |
| 0         | 0         |

|           |            |
|-----------|------------|
| 0         | 0          |
| 6.65E-21  | 6.20E-36   |
| 0         | 0          |
| 0.4381303 | 0.2546972  |
| 0         | 0          |
| 0         | 0          |
| 0         | 0          |
| 0         | 0          |
| 0         | 0          |
| 0         | 0          |
| 0.1113687 | 0.08325285 |
| 0         | 0          |
| 0.3308655 | 0.2049441  |
| 9.69E-17  | 2.29E-29   |
| 1.32E-11  | 1.31E-21   |
| 2.09E-15  | 8.13E-26   |
| 0.6759381 | 0.4493528  |
| 0.0801313 | 0.05661085 |
| 4.88E-09  | 3.37E-09   |
| 0.3618612 | 0.2512037  |
| 1.156055  | 0.1427627  |
| 0.2699434 | 0.1496561  |
| 1.140965  | 0.7832488  |
| 2.89E-21  | 1.37E-40   |
| 0.1358101 | 0.07719347 |
| 0.5796916 | 0.1160049  |
| 2.48E-10  | 2.01E-13   |
| 1.80E-16  | 4.45E-32   |
| 2.186746  | 0.6069503  |
| 0         | 0          |
| 0         | 0          |
| 0.5558474 | 0.3293505  |
| 0.860888  | 0.4363634  |

|            |            |
|------------|------------|
| 8.07E-10   | 5.64E-10   |
| 8.88E-12   | 1.20E-18   |
| 0.1833841  | 0.1272677  |
| 0          | 0          |
| 1.195702   | 0.8118773  |
| 3.79E-30   | 6.97E-61   |
| 0          | 0          |
| 0          | 0          |
| 0.08615637 | 0.061987   |
| 0.1069364  | 0.07318254 |
| 0.1004796  | 0.06706324 |
| 1.65E-28   | 1.86E-56   |
| 0.1102883  | 0.07337211 |
| 2.73E-16   | 2.24E-30   |
| 1.03E-25   | 7.95E-49   |
| 1.82E-20   | 1.60E-38   |
| 16.036     | 8.071169   |
| 25.72425   | 14.56789   |
| 12.58701   | 6.141084   |
| 17.27389   | 8.626166   |
| 10.12568   | 4.90841    |
| 4.297039   | 3.134744   |
| 7.036252   | 4.818599   |
| 8.720533   | 5.673359   |
| 7.634462   | 4.950614   |
| 10.05306   | 6.371423   |
| 4.39985    | 2.920582   |
| 2.573771   | 1.152835   |
| 0.606018   | 0.1888153  |
| 1.287477   | 0.5832386  |
| 1.799535   | 0.7154611  |
| 2.314172   | 0.8144325  |
| 1.365183   | 0.4293882  |

|           |           |
|-----------|-----------|
| 1.090873  | 0.402396  |
| 2.43E-08  | 8.03E-14  |
| 4.87E-13  | 2.42E-25  |
| 3.11E-08  | 4.79E-15  |
| 1.112936  | 0.4918734 |
| 1.587732  | 0.8198817 |
| 1.94E-13  | 5.44E-26  |
| 2.020633  | 0.7512666 |
| 7.14E-11  | 1.09E-20  |
| 0.6656054 | 0.4261252 |
| 9.01E-12  | 9.82E-23  |
| 2.02E-14  | 1.76E-28  |
| 1.16E-09  | 2.55E-17  |
| 0.7056847 | 0.3746933 |
| 1.13E-09  | 3.37E-18  |
| 2.050448  | 0.9141638 |
| 0.7969709 | 0.4386697 |
| 4.28E-10  | 2.60E-19  |
| 2.44E-11  | 6.43E-20  |
| 0.6557942 | 0.3256747 |
| 1.03E-12  | 3.56E-25  |
| 2.456464  | 1.041828  |
| 1.082209  | 0.5163745 |
| 1.62E-11  | 8.65E-22  |
| 1.728411  | 0.4792077 |
| 1.174718  | 0.4707385 |
| 1.22E-08  | 3.25E-16  |
| 1.494186  | 0.667372  |
| 1.262106  | 0.4597099 |
| 0.7144856 | 0.216382  |
| 1.00E-14  | 5.65E-27  |
| 0.9164472 | 0.298852  |
| 3.94E-16  | 8.03E-31  |

|          |          |
|----------|----------|
| 27.77054 | 14.04781 |
| 19.81028 | 10.29678 |
| 44.94524 | 22.88688 |
| 16.55421 | 7.692716 |
| 32.27593 | 16.12922 |
| 31.51056 | 23.64561 |
| 32.36582 | 23.81208 |
| 17.4831  | 11.45664 |
| 17.60968 | 11.67595 |
| 16.43357 | 10.86364 |
| 39.30241 | 29.26474 |
| 20.22515 | 11.46004 |
| 11.54274 | 5.784375 |
| 15.76584 | 8.587605 |
| 11.51408 | 5.471742 |
| 19.57256 | 11.05227 |
| 20.08086 | 10.92473 |
| 13.42266 | 7.059452 |
| 13.57928 | 7.394378 |
| 9.232549 | 4.827702 |
| 8.396013 | 4.601652 |
| 12.82358 | 7.619673 |
| 6.05E-08 | 9.37E-15 |
| 11.83932 | 6.310415 |
| 9.994436 | 5.207467 |
| 14.44248 | 7.269028 |
| 9.674673 | 4.411443 |
| 10.17269 | 5.113616 |
| 12.73527 | 7.370587 |
| 22.54744 | 12.90744 |
| 8.58E-11 | 2.32E-20 |
| 17.3788  | 10.10792 |
| 14.14204 | 8.054221 |



|           |           |
|-----------|-----------|
| 6.848841  | 3.340192  |
| 9.33E-11  | 3.10E-20  |
| 21.11889  | 11.72739  |
| 12.60105  | 6.850993  |
| 12.21381  | 6.776726  |
| 23.6289   | 12.99834  |
| 12.31824  | 6.185273  |
| 11.59035  | 6.547173  |
| 18.79107  | 10.52124  |
| 7.858597  | 3.712894  |
| 10.92364  | 4.949789  |
| 12.75282  | 6.793044  |
| 1.05E-10  | 4.37E-21  |
| 13.15462  | 6.61141   |
| 2.19E-11  | 3.16E-21  |
| 8.370761  | 4.049065  |
| 1.73E-08  | 1.12E-15  |
| 19.80566  | 9.842019  |
| 24.81297  | 13.67466  |
| 7.794856  | 3.609858  |
| 13.31897  | 6.343982  |
| 16.01291  | 7.634772  |
| 15.61229  | 11.51101  |
| 14.49449  | 10.43682  |
| 14.70983  | 9.766302  |
| 13.65218  | 8.959991  |
| 15.34555  | 10.16214  |
| 16.26402  | 11.82822  |
| 0.4140853 | 0.1999274 |
| 1.45E-09  | 2.60E-14  |
| 3.66E-10  | 2.10E-19  |
| 2.36E-11  | 4.41E-19  |
| 1.61E-09  | 4.52E-17  |

|           |           |
|-----------|-----------|
| 7.59E-08  | 1.57E-14  |
| 2.62E-08  | 3.44E-16  |
| 2.72E-09  | 5.58E-17  |
| 2.31E-09  | 2.01E-17  |
| 5.15E-10  | 1.42E-18  |
| 9.61E-10  | 5.67E-18  |
| 1.01E-11  | 1.12E-21  |
| 1.12E-11  | 7.75E-22  |
| 1.07E-13  | 4.43E-19  |
| 3.72E-09  | 3.14E-17  |
| 4.43E-12  | 7.57E-23  |
| 5.77E-10  | 1.81E-18  |
| 3.00E-10  | 6.78E-19  |
| 0.1761704 | 0.0847182 |
| 4.65E-13  | 4.25E-24  |
| 1.17E-09  | 1.82E-17  |
| 1.84E-10  | 6.73E-19  |
| 2.30E-10  | 4.31E-19  |
| 4.01E-12  | 6.83E-23  |
| 2.59E-09  | 3.66E-17  |
| 2.44E-09  | 2.65E-17  |
| 2.28E-09  | 5.73E-17  |
| 4.62E-12  | 1.49E-22  |
| 3.14E-09  | 1.25E-16  |
| 1.73E-10  | 1.67E-19  |
| 9.66E-12  | 1.26E-19  |
| 5.25E-10  | 2.06E-19  |
| 8.44E-09  | 2.73E-09  |
| 4.56E-12  | 2.96E-22  |
| 2.52E-10  | 1.97E-18  |
| 3.39E-08  | 2.07E-08  |
| 4.70E-10  | 9.67E-13  |
| 1.55E-13  | 1.77E-20  |

|              |             |
|--------------|-------------|
| 6.25E-11     | 1.18E-19    |
| 0.0003457964 | 0.000201151 |
| 0.003497744  | 0.0013112   |
| 0.0006497741 | 0.000364878 |
| 0.001442236  | 0.000528715 |
| 0.0004915105 | 0.000285092 |
| 9.61E-34     | 2.28E-64    |
| 8.96E-07     | 2.20E-08    |
| 6.82E-28     | 1.41E-41    |
| 0            | 0           |
| 0.0003076264 | 9.55E-05    |
| 0            | 0           |
| 0.086812     | 0.04310746  |
| 0.08121648   | 0.03659968  |
| 0.1109353    | 0.05281631  |
| 0.0379262    | 0.01607115  |
| 0.3912376    | 0.2197807   |
| 0.1038094    | 0.05023759  |
| 0.2002075    | 0.1020611   |
| 0.02295725   | 0.01055122  |
| 0.1045154    | 0.05039871  |
| 0.1057725    | 0.05227244  |
| 0.09044418   | 0.04205135  |
| 0.08774607   | 0.04185247  |
| 0.09124059   | 0.04269918  |
| 0.03908597   | 0.01472365  |
| 0.2248167    | 0.1154634   |
| 0.2679352    | 0.1501542   |
| 0.03954566   | 0.0168798   |
| 0.0538741    | 0.02408544  |
| 0.04701233   | 0.01903849  |
| 0.04888214   | 0.02125843  |
| 0.04911561   | 0.02344252  |

|            |            |
|------------|------------|
| 0.05156698 | 0.02422621 |
| 0.05584294 | 0.02313508 |
| 0.1023655  | 0.04543194 |
| 0.09045937 | 0.04243185 |
| 0.04343439 | 0.01566357 |
| 0.07632575 | 0.03360424 |
| 0.0748772  | 0.02576741 |
| 0.03775583 | 0.01369338 |
| 0.02586881 | 0.01098602 |
| 0.0336861  | 0.01266355 |
| 0.08756714 | 0.04288702 |
| 0.1263047  | 0.06088379 |
| 0.06171243 | 0.02540535 |
| 0.1121641  | 0.05190802 |
| 0.09510654 | 0.04288387 |
| 0.1112046  | 0.05331022 |
| 0.09013669 | 0.04242804 |
| 0.1398822  | 0.07544755 |
| 6.024166   | 3.504396   |
| 22.24461   | 14.00358   |
| 11.54222   | 6.489689   |
| 0.6323582  | 0.3654359  |
| 4.522091   | 2.628756   |
| 6.067059   | 4.839453   |
| 4.380098   | 3.414843   |
| 0.4577862  | 0.3307672  |
| 0.5933954  | 0.4282383  |
| 0.7369776  | 0.5303484  |
| 5.540932   | 4.373666   |
| 1.083474   | 0.8096872  |
| 0.4248314  | 0.2882334  |
| 3.518851   | 2.399816   |
| 2.127175   | 1.462095   |

|           |           |
|-----------|-----------|
| 3.078935  | 1.374034  |
| 6.29E-17  | 2.59E-33  |
| 4.241553  | 2.858519  |
| 0.584462  | 0.4053757 |
| 0.2063945 | 0.1424589 |
| 1.819222  | 1.329168  |
| 1.205785  | 0.8575648 |
| 2.524548  | 0.7817433 |
| 4.44174   | 2.947575  |
| 3.173158  | 2.219285  |
| 1.58013   | 1.030108  |
| 0.7570513 | 0.5168988 |
| 0.4879724 | 0.3389262 |
| 3.27335   | 2.277679  |
| 0.3351736 | 0.2329335 |
| 1.144476  | 0.8475136 |
| 1.849906  | 1.322901  |
| 1.21E-23  | 2.80E-42  |
| 1.08E-14  | 1.92E-26  |
| 4.08E-16  | 1.28E-31  |
| 0.1757151 | 0.1220252 |
| 0.202296  | 0.14046   |
| 2.09E-17  | 8.36E-32  |
| 5.125698  | 3.478951  |
| 2.285086  | 1.638932  |
| 1.725877  | 1.239219  |
| 0.7648076 | 0.5558529 |
| 2.199688  | 1.586987  |
| 1.73E-15  | 1.18E-27  |
| 1.463348  | 0.9893748 |
| 2.064204  | 1.385271  |
| 2.97178   | 1.976888  |
| 1.838263  | 1.253078  |



|           |           |
|-----------|-----------|
| 0         | 0         |
| 0         | 0         |
| 4.67E-19  | 6.23E-36  |
| 1.03E-18  | 1.65E-31  |
| 1.96E-17  | 2.02E-37  |
| 4.79E-32  | 1.98E-64  |
| 0         | 0         |
| 0         | 0         |
| 0         | 0         |
| 0         | 0         |
| 0         | 0         |
| 0         | 0         |
| 2.47E-19  | 9.55E-42  |
| 0         | 0         |
| 0         | 0         |
| 2.36E-19  | 1.29E-29  |
| 0         | 0         |
| 6.18E-28  | 9.90E-42  |
| 0         | 0         |
| 30.32207  | 16.54739  |
| 51.16537  | 30.13129  |
| 63.02945  | 33.85597  |
| 4.411694  | 2.133305  |
| 16.45644  | 8.778278  |
| 10.44387  | 7.758238  |
| 23.12929  | 17.24475  |
| 1.827953  | 1.315051  |
| 2.569655  | 1.646923  |
| 1.685342  | 1.188105  |
| 18.42816  | 13.70855  |
| 1.875269  | 0.5943752 |
| 0.4334782 | 0.2925697 |
| 0.1094479 | 0.0732107 |

|             |             |
|-------------|-------------|
| 5.28E-15    | 4.92E-28    |
| 1.178349    | 0.6654842   |
| 0.1432546   | 0.09886125  |
| 0.2422935   | 0.1214566   |
| 5.28E-05    | 8.80E-10    |
| 0.229286    | 0.1576941   |
| 1.488295    | 0.7919609   |
| 2.540887    | 1.091601    |
| 1.228576    | 0.4276896   |
| 9.66E-11    | 1.03E-18    |
| 0.001294245 | 1.08E-06    |
| 1.46E-11    | 4.64E-19    |
| 4.58E-15    | 6.98E-29    |
| 1.981849    | 0.4095121   |
| 0.03122258  | 0.000783839 |
| 0.05216785  | 0.03482645  |
| 9.02E-11    | 1.31E-18    |
| 0.06863918  | 0.03590727  |
| 0.3592888   | 0.1309271   |
| 3.09E-15    | 2.81E-27    |
| 4.17E-13    | 3.89E-25    |
| 0.8416164   | 0.2770066   |
| 0.3225589   | 0.1677119   |
| 0.3582772   | 0.1785868   |
| 1.484758    | 0.5079117   |
| 1.976389    | 0.9454063   |
| 1.55908     | 0.3860175   |
| 0.499064    | 0.07953507  |
| 0.287168    | 0.1058166   |
| 4.44E-14    | 5.28E-24    |
| 0.3887085   | 0.1508374   |
| 5.10E-12    | 1.20E-22    |
| 7.76E-15    | 3.39E-28    |





|            |             |
|------------|-------------|
| 7.43E-20   | 1.23E-20    |
| 2.54E-25   | 5.32E-50    |
| 0          | 0           |
| 0          | 0           |
| 0          | 0           |
| 1.70E-27   | 3.44E-56    |
| 4.11E-23   | 1.29E-45    |
| 0          | 0           |
| 4.06E-20   | 9.52E-40    |
| 0          | 0           |
| 0          | 0           |
| 0          | 0           |
| 3.45E-30   | 1.18E-61    |
| 0          | 0           |
| 4.96E-05   | 8.21E-07    |
| 0          | 0           |
| 0          | 0           |
| 1.96E-16   | 7.03E-32    |
| 0          | 0           |
| 2.36E-20   | 3.66E-38    |
| 0.02224464 | 0.01294022  |
| 0.05971181 | 0.0375908   |
| 1.47E-19   | 1.19E-34    |
| 0          | 0           |
| 1.25E-11   | 1.25E-15    |
| 0.03022559 | 0.02410975  |
| 0.01015246 | 0.007915132 |
| 0          | 0           |
| 0          | 0           |
| 0          | 0           |
| 0          | 0           |
| 0.8838816  | 0.2204898   |
| 0.03117362 | 0.02115043  |

|              |            |
|--------------|------------|
| 1.28E-24     | 2.21E-46   |
| 3.80E-12     | 3.72E-23   |
| 0.0389912    | 0.02647261 |
| 0            | 0          |
| 3.72E-23     | 1.55E-44   |
| 9.44E-22     | 2.27E-25   |
| 0.03258127   | 0.02249451 |
| 0            | 0          |
| 8.20E-28     | 7.19E-57   |
| 0            | 0          |
| 9.12E-26     | 1.06E-48   |
| 0            | 0          |
| 0            | 0          |
| 0            | 0          |
| 3.54E-07     | 4.00E-08   |
| 0            | 0          |
| 0.1494518    | 0.1038636  |
| 9.50E-29     | 1.21E-57   |
| 1.49E-21     | 1.46E-41   |
| 0.0007495903 | 2.10E-05   |
| 0.02971799   | 0.02089391 |
| 1.39E-23     | 4.21E-39   |
| 1.45E-14     | 3.04E-26   |
| 4.18E-20     | 2.58E-34   |
| 0            | 0          |
| 9.03E-29     | 3.37E-54   |
| 0            | 0          |
| 0            | 0          |
| 1.06E-29     | 6.68E-61   |
| 0            | 0          |
| 3.58E-19     | 3.62E-34   |
| 0.04550266   | 0.02157229 |
| 0            | 0          |

|            |             |
|------------|-------------|
| 3.84E-29   | 7.90E-60    |
| 6.78E-29   | 2.86E-55    |
| 2.81E-20   | 1.20E-28    |
| 6.24E-23   | 1.30E-39    |
| 16.58934   | 8.940462    |
| 43.0231    | 25.6461     |
| 32.78124   | 17.47394    |
| 7.939705   | 4.141606    |
| 23.7455    | 12.67891    |
| 16.86131   | 13.03383    |
| 16.47745   | 12.56747    |
| 10.10264   | 7.246543    |
| 11.40491   | 8.00698     |
| 11.43342   | 8.134939    |
| 20.40959   | 15.60887    |
| 12.21564   | 7.9568      |
| 8.36E-12   | 8.19E-22    |
| 3.07E-06   | 2.31E-11    |
| 0.7017808  | 0.1789419   |
| 15.12765   | 9.271674    |
| 16.59045   | 9.997635    |
| 24.04702   | 14.45433    |
| 1.05E-09   | 7.42E-10    |
| 15.68585   | 9.825517    |
| 4.71E-13   | 2.51E-24    |
| 3.57E-14   | 7.87E-27    |
| 18.58214   | 11.33931    |
| 0.04867507 | 0.006874251 |
| 0.03204345 | 0.004449701 |
| 14.52705   | 8.438293    |
| 4.99E-13   | 6.30E-25    |
| 4.36E-10   | 5.70E-20    |
| 3.92E-12   | 4.65E-23    |





|            |            |
|------------|------------|
| 0          | 0          |
| 0          | 0          |
| 0          | 0          |
| 0          | 0          |
| 0          | 0          |
| 5.219475   | 2.722985   |
| 5.95336    | 3.19216    |
| 2.51085    | 1.124289   |
| 3.561129   | 1.92724    |
| 8.438082   | 4.452366   |
| 4.451753   | 3.336726   |
| 5.524604   | 4.013677   |
| 4.097071   | 2.739038   |
| 4.332547   | 2.898997   |
| 3.078332   | 2.071412   |
| 4.476861   | 3.503198   |
| 0.4203231  | 0.2582442  |
| 0.3598401  | 0.227889   |
| 1.105593   | 0.4182219  |
| 0.6067761  | 0.4132011  |
| 1.19891    | 0.555058   |
| 1.055322   | 0.5885842  |
| 0.6293072  | 0.2928192  |
| 0.4065507  | 0.267073   |
| 0.6492923  | 0.2340962  |
| 0.4324869  | 0.2389532  |
| 0.4364493  | 0.3063143  |
| 0.1076784  | 0.06764327 |
| 0.6733309  | 0.2523903  |
| 0.3930688  | 0.2606973  |
| 0.4469021  | 0.2850429  |
| 0.3953138  | 0.2644425  |
| 0.08794489 | 0.06084863 |

|            |           |
|------------|-----------|
| 0.08390931 | 0.0540114 |
| 0.732808   | 0.4665803 |
| 0.4229989  | 0.2850793 |
| 0.9168641  | 0.2948885 |
| 0.9090468  | 0.4868393 |
| 0.2940292  | 0.2022659 |
| 0.9315249  | 0.5716185 |
| 0.3243383  | 0.201866  |
| 0.6297688  | 0.2133985 |
| 0.2090229  | 0.1379745 |
| 0.7553543  | 0.341583  |
| 0.5215305  | 0.3436159 |
| 0.2636037  | 0.1689856 |
| 0.9277594  | 0.526739  |
| 0.2747355  | 0.1951015 |
| 0.3113082  | 0.193166  |
| 0.4120583  | 0.2758656 |
| 0.334829   | 0.2109572 |
| 1.312718   | 0.7413677 |
| 0.7341504  | 0.4926313 |
| 0.5988702  | 0.3323507 |
| 0.5280233  | 0.357883  |



Supplementary Table 4: Gene expression values for 3 genes present in Tapidor and predicted to be absent in Darmor using RNA-Seq data from Darmor, 1

| Gene            | Library                  | Unique Counts | FPKM | FPKM Confidence Low |
|-----------------|--------------------------|---------------|------|---------------------|
| BnaA05g23840.1T | Darmor_AUP_AOSW_2_D09BTA | 0             | 0    | 0                   |
|                 | Darmor_AUP_BOSW_3_D09BTA | 0             | 0    | 0                   |
|                 | Darmor_AUP_DOSW_2_D09BTA | 0             | 0    | 0                   |
|                 | Darmor_AUP_FOSW_4_D09BTA | 0             | 0    | 0                   |
|                 | Darmor_AUP_HOSW_5_D09BTA | 0             | 0    | 0                   |
|                 | Darmor_AUP_IAOSW_1_1_COU | 0             | 0    | 0                   |
|                 | Darmor_AUP_KAOSW_2_1_COU | 0             | 0    | 0                   |
|                 | Darmor_AUP_LAOSW_3_1_COU | 0             | 0    | 0                   |
|                 | Darmor_AUP_MAOSW_4_1_CO  | 0             | 0    | 0                   |
|                 | Darmor_AUP_NAOSW_5_1_COU | 0             | 0    | 0                   |
|                 | Darmor_AUP_PAOSW_6_1_COU | 0             | 0    | 0                   |
|                 | Ningyou_ERR037335        | 0             | 0    | 0                   |
|                 | TN04_ERR037297           | 0             | 0    | 0                   |
|                 | TN05_ERR037298           | 0             | 0    | 0                   |
|                 | TN08_ERR037301           | 0             | 0    | 0                   |
|                 | TN103_ERR037317          | 0             | 0    | 0                   |
|                 | TN108_ERR037318          | 0             | 0    | 0                   |
|                 | TN109_ERR037319          | 0             | 0    | 0                   |
|                 | TN10_ERR037294           | 0             | 0    | 0                   |
|                 | TN121_ERR037320          | 0             | 0    | 0                   |
|                 | TN124_ERR037321          | 0             | 0    | 0                   |
|                 | TN126_ERR037322          | 0             | 0    | 0                   |
|                 | TN128_ERR037323          | 0             | 0    | 0                   |
|                 | TN129_ERR037324          | 0             | 0    | 0                   |
|                 | TN12_ERR037302           | 0             | 0    | 0                   |
|                 | TN138_ERR037325          | 0             | 0    | 0                   |
|                 | TN149_ERR037326          | 0             | 0    | 0                   |
|                 | TN161_ERR037327          | 0             | 0    | 0                   |
|                 | TN163_ERR037328          | 0             | 0    | 0                   |
|                 | TN170_ERR037329          | 0             | 0    | 0                   |
|                 | TN171_ERR037332          | 0             | 0    | 0                   |

|                 |                          |   |   |   |
|-----------------|--------------------------|---|---|---|
|                 | TN172_ERR037333          | 0 | 0 | 0 |
|                 | TN176_ERR037330          | 0 | 0 | 0 |
|                 | TN177_ERR037331          | 0 | 0 | 0 |
|                 | TN24_ERR037299           | 0 | 0 | 0 |
|                 | TN28_ERR037295           | 0 | 0 | 0 |
|                 | TN30_ERR037305           | 0 | 0 | 0 |
|                 | TN31_ERR037303           | 0 | 0 | 0 |
|                 | TN38_ERR037304           | 0 | 0 | 0 |
|                 | TN44_ERR037306           | 0 | 0 | 0 |
|                 | TN48_ERR037307           | 0 | 0 | 0 |
|                 | TN51_ERR037308           | 0 | 0 | 0 |
|                 | TN57_ERR037309           | 0 | 0 | 0 |
|                 | TN72_ERR037312           | 0 | 0 | 0 |
|                 | TN76_ERR037311           | 0 | 0 | 0 |
|                 | TN77_ERR037310           | 0 | 0 | 0 |
|                 | TN85_ERR037315           | 0 | 0 | 0 |
|                 | TN88_ERR037313           | 0 | 0 | 0 |
|                 | TN90_ERR037316           | 0 | 0 | 0 |
|                 | Tapidor_ERR037334        | 0 | 0 | 0 |
| BnaC02g32930.1T | Darmor_AUP_AOSW_2_D09BTA | 0 | 0 | 0 |
|                 | Darmor_AUP_BOSW_3_D09BTA | 0 | 0 | 0 |
|                 | Darmor_AUP_DOSW_2_D09BTA | 0 | 0 | 0 |
|                 | Darmor_AUP_FOSW_4_D09BTA | 0 | 0 | 0 |
|                 | Darmor_AUP_HOSW_5_D09BTA | 0 | 0 | 0 |
|                 | Darmor_AUP_IAOSW_1_1_COU | 0 | 0 | 0 |
|                 | Darmor_AUP_KAOSW_2_1_COU | 0 | 0 | 0 |
|                 | Darmor_AUP_LAOSW_3_1_COU | 0 | 0 | 0 |
|                 | Darmor_AUP_MAOSW_4_1_COU | 0 | 0 | 0 |
|                 | Darmor_AUP_NAOSW_5_1_COU | 0 | 0 | 0 |
|                 | Darmor_AUP_PAOSW_6_1_COU | 0 | 0 | 0 |
|                 | Ningyou_ERR037335        | 0 | 0 | 0 |
|                 | TN04_ERR037297           | 0 | 0 | 0 |
|                 | TN05_ERR037298           | 0 | 0 | 0 |

|  |                 |   |   |   |
|--|-----------------|---|---|---|
|  | TN08_ERR037301  | 0 | 0 | 0 |
|  | TN103_ERR037317 | 0 | 0 | 0 |
|  | TN108_ERR037318 | 0 | 0 | 0 |
|  | TN109_ERR037319 | 0 | 0 | 0 |
|  | TN10_ERR037294  | 0 | 0 | 0 |
|  | TN121_ERR037320 | 0 | 0 | 0 |
|  | TN124_ERR037321 | 0 | 0 | 0 |
|  | TN126_ERR037322 | 0 | 0 | 0 |
|  | TN128_ERR037323 | 0 | 0 | 0 |
|  | TN129_ERR037324 | 0 | 0 | 0 |
|  | TN12_ERR037302  | 0 | 0 | 0 |
|  | TN138_ERR037325 | 0 | 0 | 0 |
|  | TN149_ERR037326 | 0 | 0 | 0 |
|  | TN161_ERR037327 | 0 | 0 | 0 |
|  | TN163_ERR037328 | 0 | 0 | 0 |
|  | TN170_ERR037329 | 0 | 0 | 0 |
|  | TN171_ERR037332 | 0 | 0 | 0 |
|  | TN172_ERR037333 | 0 | 0 | 0 |
|  | TN176_ERR037330 | 0 | 0 | 0 |
|  | TN177_ERR037331 | 0 | 0 | 0 |
|  | TN24_ERR037299  | 0 | 0 | 0 |
|  | TN28_ERR037295  | 0 | 0 | 0 |
|  | TN30_ERR037305  | 0 | 0 | 0 |
|  | TN31_ERR037303  | 0 | 0 | 0 |
|  | TN38_ERR037304  | 0 | 0 | 0 |
|  | TN44_ERR037306  | 0 | 0 | 0 |
|  | TN48_ERR037307  | 0 | 0 | 0 |
|  | TN51_ERR037308  | 0 | 0 | 0 |
|  | TN57_ERR037309  | 0 | 0 | 0 |
|  | TN72_ERR037312  | 0 | 0 | 0 |
|  | TN76_ERR037311  | 0 | 0 | 0 |
|  | TN77_ERR037310  | 0 | 0 | 0 |
|  | TN85_ERR037315  | 0 | 0 | 0 |

|                 |                          |   |           |           |
|-----------------|--------------------------|---|-----------|-----------|
|                 | TN88_ERR037313           | 0 | 0         | 0         |
|                 | TN90_ERR037316           | 0 | 0         | 0         |
|                 | Tapidor_ERR037334        | 0 | 0         | 0         |
| BnaA02g09400.1T | Darmor_AUP_AOSW_2_D09BTA | 0 | 0         | 0         |
|                 | Darmor_AUP_BOSW_3_D09BTA | 0 | 0         | 0         |
|                 | Darmor_AUP_DOSW_2_D09BTA | 0 | 7.33E-29  | 0         |
|                 | Darmor_AUP_FOSW_4_D09BTA | 0 | 0         | 0         |
|                 | Darmor_AUP_HOSW_5_D09BTA | 0 | 0         | 0         |
|                 | Darmor_AUP_IAOSW_1_1_COU | 0 | 0         | 0         |
|                 | Darmor_AUP_KAOSW_2_1_COU | 0 | 0         | 0         |
|                 | Darmor_AUP_LAOSW_3_1_COU | 0 | 0         | 0         |
|                 | Darmor_AUP_MAOSW_4_1_COU | 0 | 0         | 0         |
|                 | Darmor_AUP_NAOSW_5_1_COU | 0 | 0         | 0         |
|                 | Darmor_AUP_PAOSW_6_1_COU | 0 | 0         | 0         |
|                 | Ningyou_ERR037335        | 0 | 2.45E-44  | 0         |
|                 | TN04_ERR037297           | 0 | 0         | 0         |
|                 | TN05_ERR037298           | 0 | 0         | 0         |
|                 | TN08_ERR037301           | 0 | 0         | 0         |
|                 | TN103_ERR037317          | 0 | 0         | 0         |
|                 | TN108_ERR037318          | 0 | 0         | 0         |
|                 | TN109_ERR037319          | 0 | 0         | 0         |
|                 | TN10_ERR037294           | 0 | 1.44E-47  | 0         |
|                 | TN121_ERR037320          | 0 | 0         | 0         |
|                 | TN124_ERR037321          | 0 | 0.2951459 | 0.2951459 |
|                 | TN126_ERR037322          | 0 | 4.52E-31  | 0         |
|                 | TN128_ERR037323          | 3 | 0.8904273 | 0.8904273 |
|                 | TN129_ERR037324          | 0 | 0         | 0         |
|                 | TN12_ERR037302           | 0 | 0         | 0         |
|                 | TN138_ERR037325          | 0 | 0         | 0         |
|                 | TN149_ERR037326          | 0 | 0         | 0         |
|                 | TN161_ERR037327          | 0 | 0         | 0         |
|                 | TN163_ERR037328          | 0 | 0         | 0         |
|                 | TN170_ERR037329          | 0 | 1.97E-49  | 0         |

|  |                   |   |          |   |
|--|-------------------|---|----------|---|
|  | TN171_ERR037332   | 0 | 0        | 0 |
|  | TN172_ERR037333   | 0 | 3.24E-48 | 0 |
|  | TN176_ERR037330   | 0 | 0        | 0 |
|  | TN177_ERR037331   | 0 | 2.40E-38 | 0 |
|  | TN24_ERR037299    | 0 | 0        | 0 |
|  | TN28_ERR037295    | 0 | 5.56E-40 | 0 |
|  | TN30_ERR037305    | 0 | 0        | 0 |
|  | TN31_ERR037303    | 0 | 8.09E-37 | 0 |
|  | TN38_ERR037304    | 0 | 0        | 0 |
|  | TN44_ERR037306    | 0 | 0        | 0 |
|  | TN48_ERR037307    | 0 | 0        | 0 |
|  | TN51_ERR037308    | 0 | 0        | 0 |
|  | TN57_ERR037309    | 0 | 0        | 0 |
|  | TN72_ERR037312    | 0 | 0        | 0 |
|  | TN76_ERR037311    | 0 | 0        | 0 |
|  | TN77_ERR037310    | 0 | 0        | 0 |
|  | TN85_ERR037315    | 0 | 0        | 0 |
|  | TN88_ERR037313    | 0 | 0        | 0 |
|  | TN90_ERR037316    | 0 | 1.14E-49 | 0 |
|  | Tapidor_ERR037334 | 0 | 1.90E-19 | 0 |











|          |          |
|----------|----------|
| 0        | 0        |
| 1.17E-24 | 2.02E-48 |
| 0        | 0        |
| 4.78E-20 | 1.48E-38 |
| 0        | 0        |
| 4.50E-20 | 3.43E-40 |
| 0        | 0        |
| 1.17E-18 | 5.08E-37 |
| 0        | 0        |
| 0        | 0        |
| 0        | 0        |
| 0        | 0        |
| 0        | 0        |
| 0        | 0        |
| 0        | 0        |
| 0        | 0        |
| 0        | 0        |
| 0        | 0        |
| 0        | 0        |
| 9.32E-28 | 6.88E-50 |
| 2.22E-12 | 1.31E-19 |

Supplementary Table 5: TopGO enriched terms for genes absent in Tapidor but present in Darmor

| GO ID      | Term                                        | Annotated | Significant | Expected | p-value  |
|------------|---------------------------------------------|-----------|-------------|----------|----------|
| GO:0000375 | RNA splicing, via transesterification re... | 401       | 4           | 0.25     | 5.50E-05 |
| GO:0045694 | regulation of embryo sac egg cell           | 11        | 1           | 0.01     | 0.0068   |
| GO:0010451 | floral meristem growth                      | 14        | 1           | 0.01     | 0.0086   |
| GO:0010501 | RNA secondary structure unwinding           | 229       | 2           | 0.14     | 0.0088   |
| GO:0010450 | inflorescence meristem growth               | 15        | 1           | 0.01     | 0.0092   |
| GO:0000023 | maltose metabolic process                   | 17        | 1           | 0.01     | 0.0104   |
| GO:0010165 | response to X-ray                           | 20        | 1           | 0.01     | 0.0122   |
| GO:0033388 | putrescine biosynthetic process from arg... | 21        | 1           | 0.01     | 0.0128   |
| GO:0050982 | detection of mechanical stimulus            | 28        | 1           | 0.02     | 0.0171   |
| GO:0042732 | D-xylose metabolic process                  | 30        | 1           | 0.02     | 0.0183   |
| GO:0080148 | negative regulation of response to water... | 32        | 1           | 0.02     | 0.0195   |
| GO:0006821 | chloride transport                          | 40        | 1           | 0.02     | 0.0243   |
| GO:0009969 | xyloglucan biosynthetic process             | 42        | 1           | 0.03     | 0.0255   |
| GO:0036065 | fucosylation                                | 46        | 1           | 0.03     | 0.0279   |
| GO:0007062 | sister chromatid cohesion                   | 55        | 1           | 0.03     | 0.0333   |
| GO:0015693 | magnesium ion transport                     | 55        | 1           | 0.03     | 0.0333   |
| GO:0010082 | regulation of root meristem growth          | 57        | 1           | 0.04     | 0.0345   |
| GO:0000387 | spliceosomal snRNP assembly                 | 59        | 1           | 0.04     | 0.0357   |
| GO:1903830 | magnesium ion transmembrane transport       | 61        | 1           | 0.04     | 0.0369   |
| GO:0006108 | malate metabolic process                    | 66        | 1           | 0.04     | 0.0398   |
| GO:0000122 | negative regulation of transcription fro... | 68        | 1           | 0.04     | 0.041    |
| GO:0009311 | oligosaccharide metabolic process           | 294       | 2           | 0.18     | 0.0411   |
| GO:0009098 | leucine biosynthetic process                | 74        | 1           | 0.05     | 0.0446   |
| GO:0006825 | copper ion transport                        | 74        | 1           | 0.05     | 0.0446   |
| GO:0015766 | disaccharide transport                      | 75        | 1           | 0.05     | 0.0452   |
| GO:0006098 | pentose-phosphate shunt                     | 77        | 1           | 0.05     | 0.0463   |
| GO:0005983 | starch catabolic process                    | 78        | 1           | 0.05     | 0.0469   |
| GO:0016575 | histone deacetylation                       | 91        | 1           | 0.06     | 0.0545   |
| GO:0006397 | mRNA processing                             | 1010      | 4           | 0.62     | 0.0554   |
| GO:0051260 | protein homooligomerization                 | 97        | 1           | 0.06     | 0.058    |

Supplementary Table 6: Number and total sizes of collapsed regions in Darmor and Tapidor

| Name     | Collapsed Darmor total size | Collapsed Tapidor total size | Collapsed Darmor regions | Collapsed Tapidor regions | Size per region in Darmor | Size per region in Tapidor |
|----------|-----------------------------|------------------------------|--------------------------|---------------------------|---------------------------|----------------------------|
| chrA01   | 987                         | 1,471                        | 351,921                  | 697,674                   | 357                       | 474                        |
| chrA02   | 1,257                       | 2,387                        | 564,209                  | 1,394,761                 | 449                       | 584                        |
| chrA03   | 1,122                       | 1,907                        | 609,608                  | 1,221,015                 | 543                       | 640                        |
| chrA04   | 770                         | 701                          | 348,334                  | 261,085                   | 452                       | 372                        |
| chrA05   | 725                         | 739                          | 275,928                  | 309,924                   | 381                       | 419                        |
| chrA06   | 1,426                       | 964                          | 586,903                  | 313,083                   | 412                       | 325                        |
| chrA07   | 776                         | 726                          | 304,470                  | 245,872                   | 392                       | 339                        |
| chrA08   | 506                         | 448                          | 195,086                  | 167,022                   | 386                       | 373                        |
| chrA09   | 2,033                       | 1,293                        | 824,647                  | 447,826                   | 406                       | 346                        |
| chrA10   | 475                         | 584                          | 183,768                  | 170,122                   | 387                       | 291                        |
| Total A  | 10,077                      | 11,220                       | 4,244,874                | 5,228,384                 |                           |                            |
| chrC01   | 1,630                       | 1,233                        | 634,857                  | 404,581                   | 389                       | 328                        |
| chrC02   | 2,159                       | 2,160                        | 801,588                  | 933,152                   | 371                       | 432                        |
| chrC03   | 2,023                       | 1,765                        | 808,234                  | 496,421                   | 400                       | 281                        |
| chrC04   | 1,951                       | 1,669                        | 744,602                  | 509,246                   | 382                       | 305                        |
| chrC05   | 1,339                       | 1,478                        | 502,906                  | 410,433                   | 376                       | 278                        |
| chrC06   | 1,201                       | 1,111                        | 453,884                  | 350,364                   | 378                       | 315                        |
| chrC07   | 1,281                       | 1,286                        | 478,504                  | 388,908                   | 374                       | 302                        |
| chrC08   | 1,240                       | 1,461                        | 451,909                  | 509,657                   | 364                       | 349                        |
| chrC09   | 1,874                       | 1,767                        | 731,949                  | 499,296                   | 391                       | 283                        |
| Total C  | 14,698                      | 13,930                       | 5,608,433                | 4,502,058                 |                           |                            |
| Unplaced | 5,425                       | 1,662                        | 2,642,537                | 791,647                   | 487                       | 476                        |
| Total    | 30,200                      | 26,812                       | 12,495,844               | 10,522,089                |                           |                            |

Supplementary Table 7: Number and total sizes of repetitive regions in Darmor and Tapidor

| Chromosome     | Repetitive Darmor regions | Repetitive Tapidor regions | Repetitive Darmor total size | Repetitive Tapidor total size | Size per region in Darmor | Size per region in Tapidor |
|----------------|---------------------------|----------------------------|------------------------------|-------------------------------|---------------------------|----------------------------|
| chrA01         | 1,725                     | 165                        | 1,322,478                    | 87,648                        | 767                       | 531                        |
| chrA02         | 1,751                     | 95                         | 1,147,730                    | 37,037                        | 655                       | 390                        |
| chrA03         | 1,936                     | 111                        | 1,382,485                    | 41,601                        | 714                       | 375                        |
| chrA04         | 1,318                     | 94                         | 946,791                      | 48,599                        | 718                       | 517                        |
| chrA05         | 1,463                     | 69                         | 944,426                      | 36,826                        | 646                       | 534                        |
| chrA06         | 1,523                     | 83                         | 1,069,690                    | 29,361                        | 702                       | 354                        |
| chrA07         | 1,542                     | 98                         | 1,121,157                    | 33,009                        | 727                       | 337                        |
| chrA08         | 1,189                     | 70                         | 867,241                      | 38,164                        | 729                       | 545                        |
| chrA09         | 2,533                     | 113                        | 1,697,547                    | 40,655                        | 670                       | 360                        |
| chrA10         | 1,014                     | 58                         | 631,537                      | 40,074                        | 623                       | 691                        |
| Total A genome | 15,994                    | 956                        | 11,131,082                   | 432,974                       |                           |                            |
| chrC01         | 2,622                     | 196                        | 1,825,264                    | 99,575                        | 696                       | 508                        |
| chrC02         | 3,026                     | 85                         | 2,208,383                    | 27,450                        | 730                       | 323                        |
| chrC03         | 3,482                     | 147                        | 2,632,999                    | 52,180                        | 756                       | 355                        |
| chrC04         | 3,073                     | 115                        | 2,406,990                    | 42,593                        | 783                       | 370                        |
| chrC05         | 2,541                     | 109                        | 1,870,850                    | 32,351                        | 736                       | 297                        |
| chrC06         | 2,255                     | 89                         | 1,632,474                    | 34,029                        | 724                       | 382                        |
| chrC07         | 2,410                     | 89                         | 1,931,818                    | 36,562                        | 802                       | 411                        |
| chrC08         | 2,121                     | 98                         | 1,658,128                    | 34,555                        | 782                       | 353                        |
| chrC09         | 3,006                     | 120                        | 2,520,506                    | 52,615                        | 838                       | 438                        |
| Total C genome | 24,536                    | 1,048                      | 18,687,412                   | 411,910                       |                           |                            |
| Unplaced       | 3,245                     | 187                        | 1,989,049                    | 127,721                       | 613                       | 683                        |
| Total          | 43,775                    | 2,191                      | 31,807,543                   | 972,605                       |                           |                            |

Supplementary Table 8: Number of genes in predicted repetitive and collapsed regions in Darmor and Tapidor

| Name           | Darmor genes in repetitive regions | Tapidor genes in repetitive regions | Darmor genes in collapsed regions | Tapidor genes in collapsed regions |
|----------------|------------------------------------|-------------------------------------|-----------------------------------|------------------------------------|
| chrA01         | 380                                | 26                                  | 114                               | 163                                |
| chrA02         | 312                                | 11                                  | 154                               | 410                                |
| chrA03         | 470                                | 17                                  | 212                               | 363                                |
| chrA04         | 164                                | 8                                   | 60                                | 49                                 |
| chrA05         | 257                                | 9                                   | 75                                | 59                                 |
| chrA06         | 285                                | 13                                  | 181                               | 119                                |
| chrA07         | 164                                | 9                                   | 45                                | 51                                 |
| chrA08         | 123                                | 11                                  | 45                                | 33                                 |
| chrA09         | 377                                | 11                                  | 189                               | 140                                |
| chrA10         | 104                                | 9                                   | 41                                | 61                                 |
| Total A genome | 2636                               | 124                                 | 1116                              | 1448                               |
| chrC01         | 362                                | 28                                  | 136                               | 107                                |
| chrC02         | 381                                | 6                                   | 177                               | 245                                |
| chrC03         | 588                                | 18                                  | 222                               | 165                                |
| chrC04         | 291                                | 13                                  | 111                               | 105                                |
| chrC05         | 382                                | 8                                   | 117                               | 133                                |
| chrC06         | 152                                | 7                                   | 65                                | 73                                 |
| chrC07         | 154                                | 7                                   | 49                                | 71                                 |
| chrC08         | 132                                | 8                                   | 46                                | 70                                 |
| chrC09         | 393                                | 8                                   | 141                               | 128                                |
| Total C genome | 2835                               | 103                                 | 1064                              | 1097                               |
| Unplaced       | 232                                | 19                                  | 275                               | 106                                |
| Total          | 5703                               | 246                                 | 2455                              | 2651                               |

Supplementary Table 9: Shared domains between Darmor genes located in repetitive regions and Tapidor genes located in collapsed regions (only ten r

| Darmor                                                  |                   | Tapidor                                                 |                   |
|---------------------------------------------------------|-------------------|---------------------------------------------------------|-------------------|
| Repetitive domains                                      | Number of domains | Collapsed domains                                       | Number of domains |
| WD domain, G-beta repeat                                | 182               | WD domain, G-beta repeat                                | 59                |
| Protein kinase domain                                   | 168               | Protein kinase domain                                   | 57                |
| PPR repeat                                              | 136               | PPR repeat                                              | 55                |
| PPR repeat family                                       | 110               | RNA recognition motif. (a.k.a. RRM, RBD, or RNP domain) | 44                |
| RNA recognition motif. (a.k.a. RRM, RBD, or RNP domain) | 109               | Protein tyrosine kinase                                 | 38                |
| Protein tyrosine kinase                                 | 96                | PPR repeat family                                       | 35                |
| ABC transporter                                         | 61                | Myb-like DNA-binding domain                             | 32                |
| Myb-like DNA-binding domain                             | 55                | ABC transporter                                         | 32                |
| Mitochondrial carrier protein                           | 49                | Mitochondrial carrier protein                           | 24                |
| Leucine rich repeat                                     | 47                | Helicase conserved C-terminal domain                    | 23                |

most common domains)



Supplementary Table 10: Ten most common Swiss-Prot hits for repetitive genes in Darmor and collapsed genes in Tapidor with an e-value cutoff of 1

| Darmor repetitive genes | Full name                                                   | Hit count | Tapidor collapsed genes | Full name                                             | Hit count |
|-------------------------|-------------------------------------------------------------|-----------|-------------------------|-------------------------------------------------------|-----------|
| sp Q9LKB9 MYO6_ARATH    | Myosin-6                                                    | 12        | sp Q9FZ87 GH317_ARATH   | Indole-3-acetic acid-amido synthetase GH3.17          | 7         |
| sp Q9LXT9 CAL3_ARATH    | Callose synthase 3 (EC 2.4.1.34) (1,3-beta-glucan synthase) | 12        | sp P0DKG4 MCC07_ARATH   | MATH domain and coiled-coil domain-containing protein | 7         |
| sp O22558 STY8_ARATH    | Callose synthase 3 (EC 2.4.1.34) (1,3-beta-glucan synthase) | 12        | sp Q9LYU4 GH312_ARATH   | 4-substituted benzoates-glutamate ligase              | 7         |
| sp F4I460 MYO8_ARATH    | Myosin-8                                                    | 11        | sp P0C0M3 GH311_ORYSJ   | Probable indole-3-acetic acid-amido synthetase        | 7         |
| sp P46573 APK1B_ARATH   | Protein kinase APK1B, chloroplastic                         | 11        | sp Q9LV48 PERK1_ARATH   | Proline-rich receptor-like protein kinase             | 6         |
| sp Q3B724 CAL5_ARATH    | Callose synthase 5                                          | 11        | sp O22190 GH33_ARATH    | Indole-3-acetic acid-amido synthetase GH3.3           | 6         |
| sp Q8RWL6 STY17_ARATH   | Serine/threonine-protein kinase STY17                       | 11        | sp P0DKG5 MCC08_ARATH   | MATH domain and coiled-coil domain-containing protein | 6         |
| sp Q9AUE0 CAL1_ARATH    | Callose synthase 1                                          | 11        | sp F4I460 MYO8_ARATH    | Myosin-8                                              | 5         |
| sp F4JTP5 STY46_ARATH   | Serine/threonine-protein kinase STY46                       | 10        | sp Q9LKB9 MYO6_ARATH    | Myosin-6                                              | 5         |
| sp Q9S9V9 FBL23_ARATH   | Putative F-box/LRR-repeat protein                           | 10        | sp Q9M9M4 CSLD3_ARATH   | Cellulose synthase-like protein D3                    | 5         |
